# Supplementary material for: Molecular sexing of chick embryos by LAMP and RPA assays: a step toward in ovo egg sexing
Source: Research Square preprint supplement (doi:10.21203/rs.3.rs-5772672/v1), 2025-01-13
Supplement: Supplementary file 1 [file 4d9df0b39dd8bf38aa672af7.docx]

# Supplementary data

# Molecular sexing of chick embryos by LAMP and RPA assays: a step toward *in ovo* egg sexing

Marc Van Der Hofstadt1, Nicolas l’Helgoualch1, Juliette Houot-Cernettig1, Thérèse Galindo1, Taciana Manso1, Priscila Martins1, Joris Huguenin1, Julien Espeut1, Thi Nhu Ngoc Van1,2*, Franck Molina1.

1Sys2Diag UMR9005 CNRS/ALCEN, Cap Gamma, Parc Euromédecine, 1682 rue de la Valsière, 34184, Montpellier, CEDEX 4, France.

2SkillCell/ALCEN, Cap Gamma, Parc Euromédecine, 1682 rue de la Valsière, 34184, Montpellier, CEDEX 4, France

*Corresponding Author:

Thi Nhu Ngoc Van: [thi-nhu-ngoc.van@sys2diag.cnrs.fr](mailto:thi-nhu-ngoc.van@sys2diag.cnrs.fr) /ORCID ID: 0000-0002-5820-1150.

Author emails:

Marc Van Der Hofstadt: [marcvdhs@gmail.com](mailto:marcvdhs@gmail.com) /ORCID ID: 0000-0001-5987-7657

Nicolas l’Helgoualch: [nicolas.lheloualch@gmail.com](mailto:nicolas.lheloualch@gmail.com)

Juliette Houot-Cernettig: [juliette.houot@sys2diag.cnrs.fr](mailto:juliette.houot@sys2diag.cnrs.fr)

Thérèse Galindo: [therese.galindo@sys2diag.cnrs.fr](mailto:therese.galindo@sys2diag.cnrs.fr)

Priscila Martins: [pri.gmartins@gmail.com](mailto:pri.gmartins@gmail.com)

Joris Huguenin: [Joris.huguenin@tuta.io](mailto:Joris.huguenin@tuta.io)

Taciana Manso: [taciana.manso@gmail.com](mailto:taciana.manso@gmail.com)

Julien Espeut: [julien.espeut@gmail.com](mailto:julien.espeut@gmail.com) / ORCID ID: 0000-0002-0182-033X

Franck Molina: [franck.molina@sys2diag.cnrs.fr](mailto:franck.molina@sys2diag.cnrs.fr) /ORCID ID: 0000-0003-4181-0854


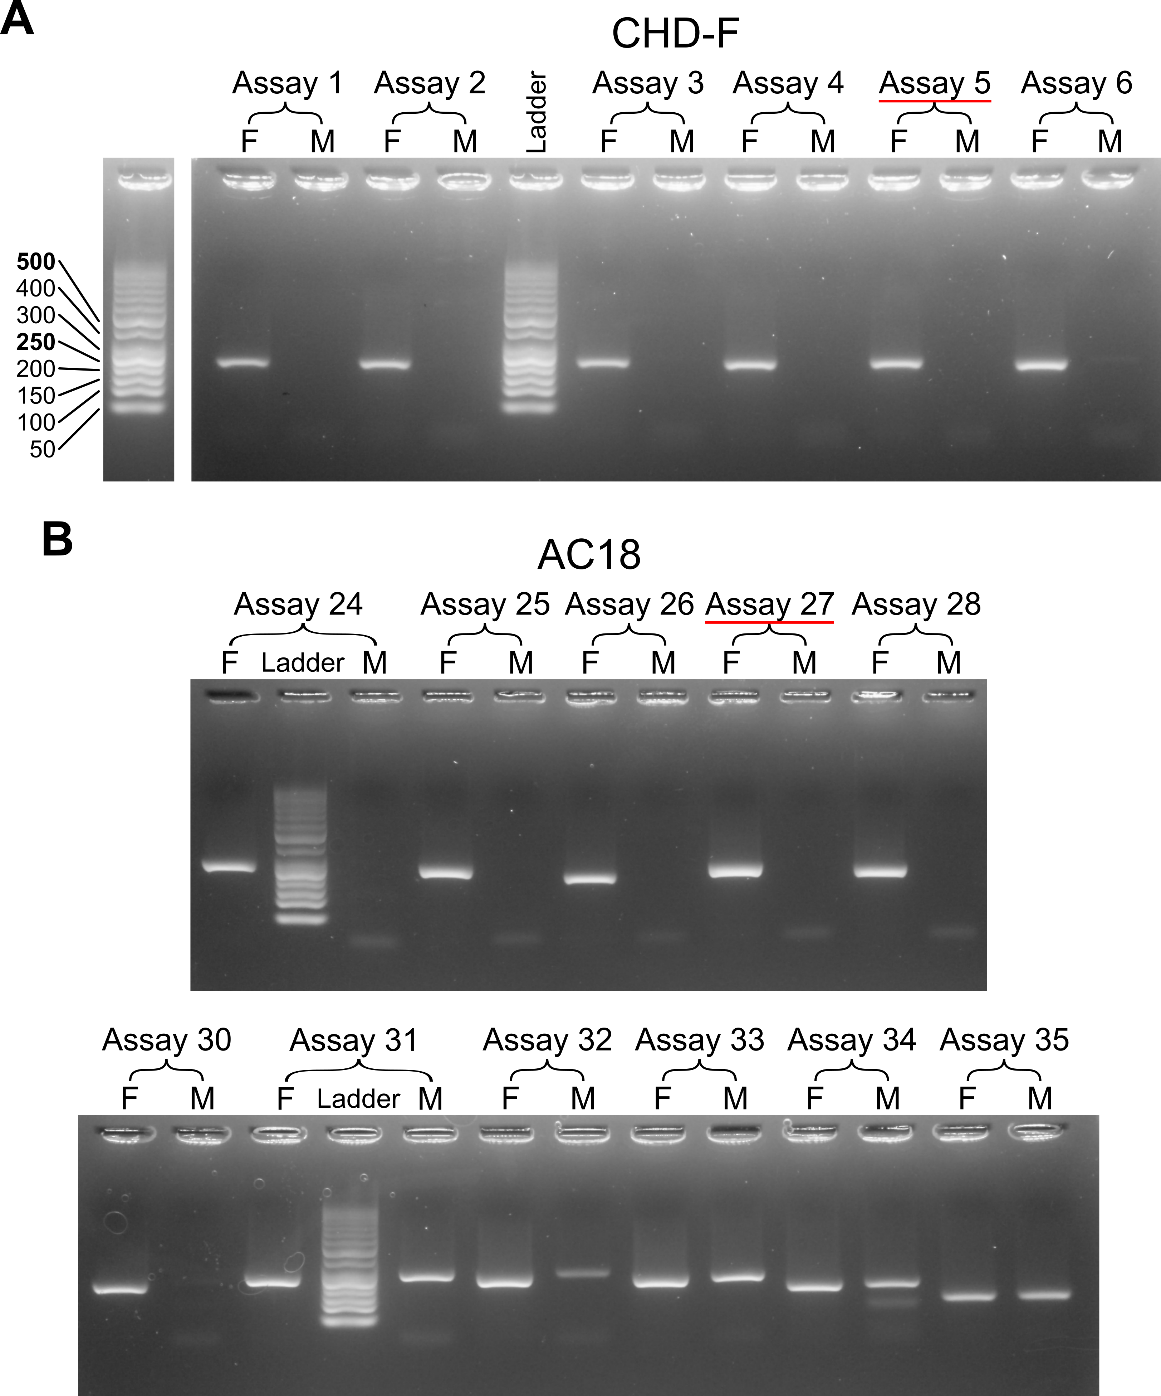


**Figure S1. Primer pair screening for amplification of female specific fragment.** PCR products amplified by different primer combinations for CHD-F **(A)** and AC18 **(B)** assay are visualized on 1.5% agarose gel electrophoresis. Female specific amplification are shown in assays 1-6 for CDH-F and assay 24-30 for AC18. Primer pairs for assay 5 and 27 (underlined in red) were selected for the subsequent experiments. Thermo Scientific GeneRuler 50 bp DNA Ladder was used. Sex determination of the used male and samples are performed by SWIM/12 assay as describled in our previous work [9].

##
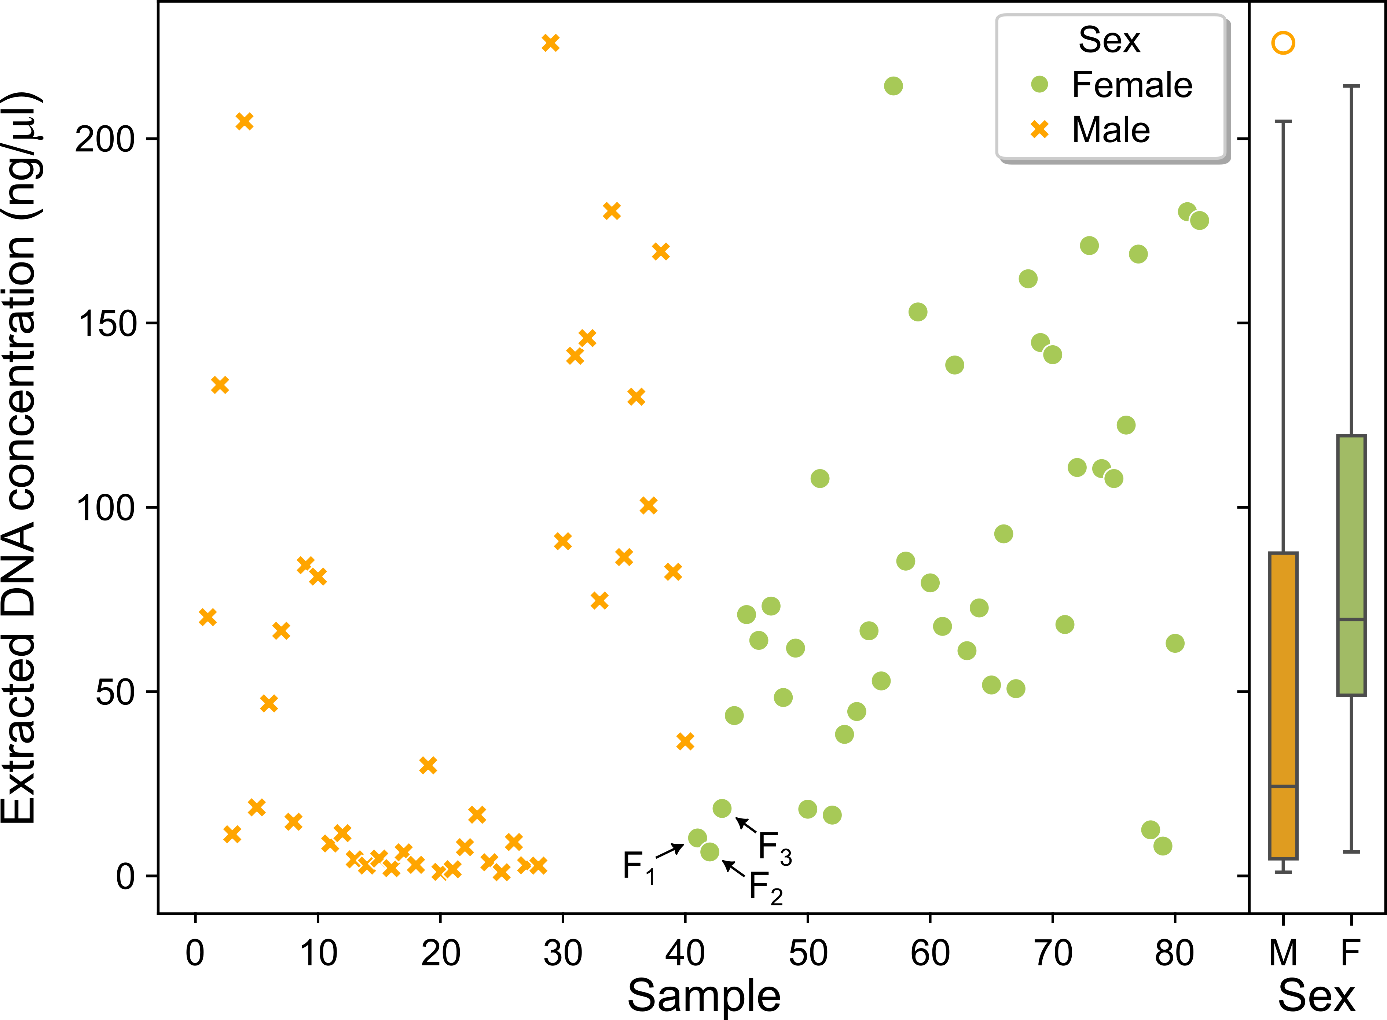


**Figure S2. DNA extracted from day 9 post-hatching embryos ranged from 1 ng/µL up to 214 ng/µL.** The samples are position in the x-axis relative to their reference (Table S2).


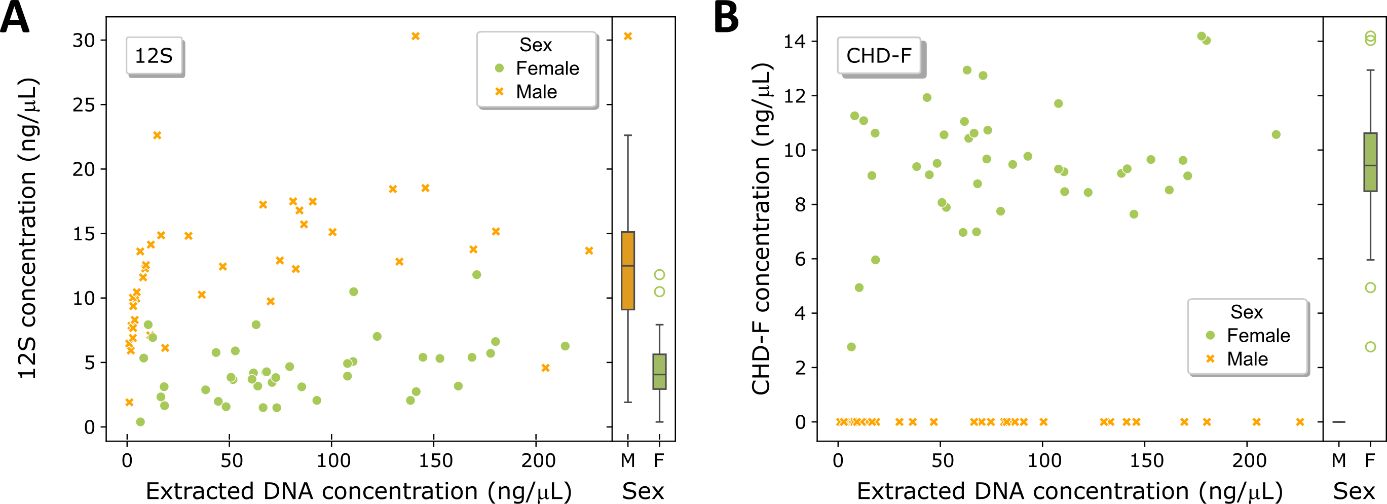


**Figure S3. The concentration of the extracted DNA does not affect amplification of neither 12S nor CHD-F amplicons of the 12S/CHD-F PCR assay.** Concentration of PCR products calculated by Labchip software for the **(A)** 12S and the **(B)** CHD-F locus are not dependent on the concentration of the input DNA.


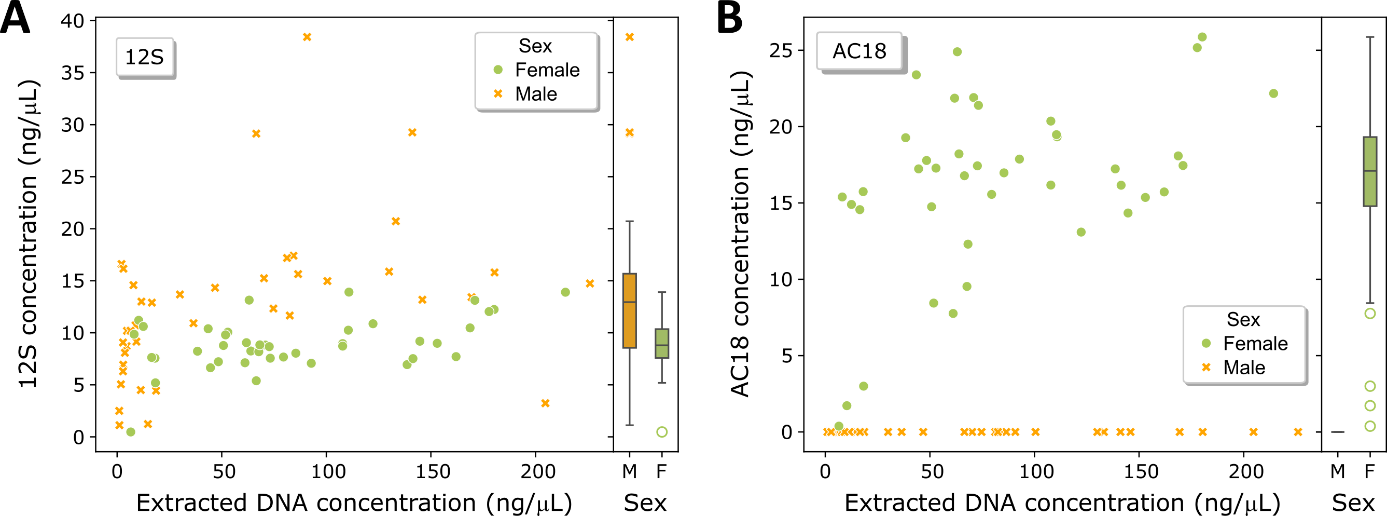


**Figure S4. The concentration of the extracted DNA does not affect amplification of neither 12S nor AC128 amplicons of the 12S/AC18 PCR assay.** Concentration of PCR products calculated by Labchip software for the **(A)** 12S and the **(B)** AC18 locus are not dependent on the concentration of the input DNA.


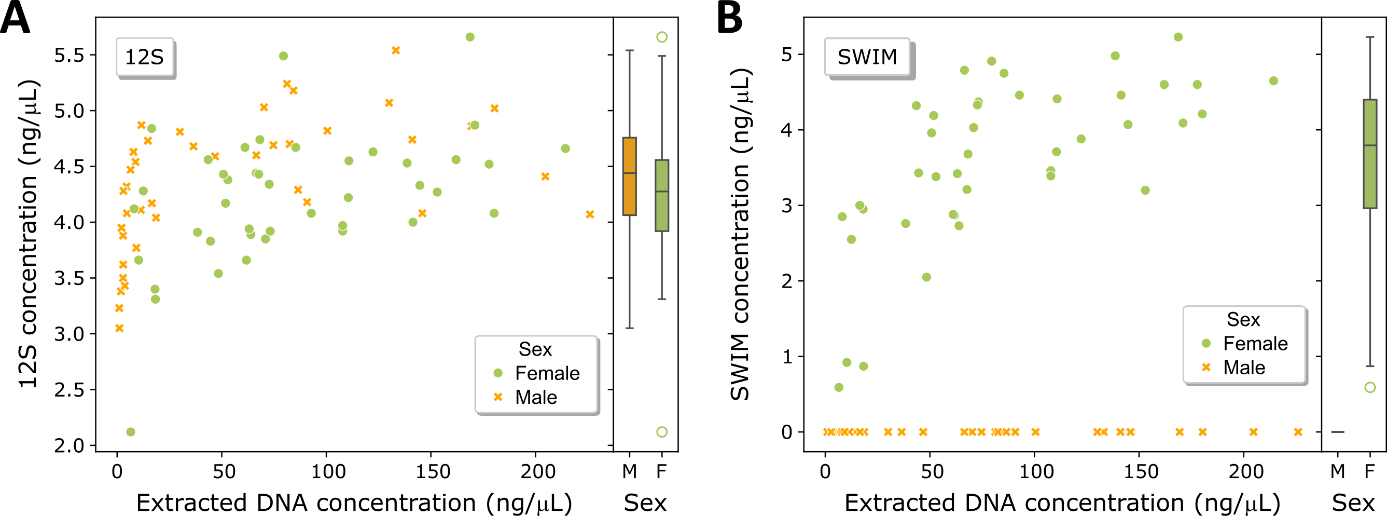


**Figure S5. The concentration of the extracted DNA does not affect amplification of neither of 12S nor SWIM amplicons of the SWIM/12S PCR assay.** Concentration of PCR products calculated by Labchip software for the **(A)** 12S and the **(B)** SWIM locus are not dependent on the concentration of the input DNA.


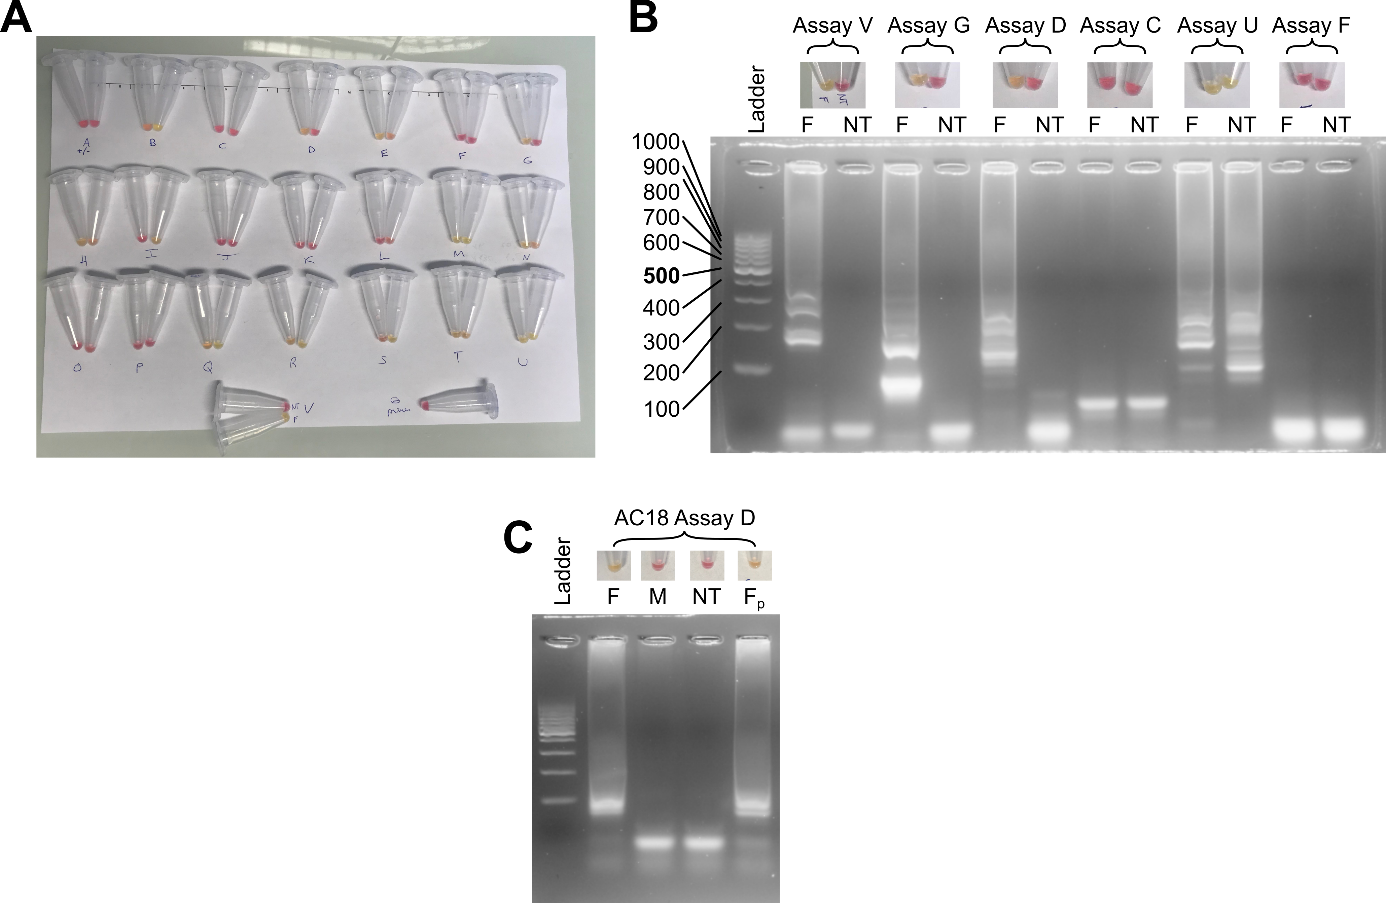


**Figure S6. Screening for female specific primer combination of the LAMP assays. (A)** Endpoint colorimetric product of LAMP assay using different prime combinations, where yellow represents high DNA amplification and pink represent no DNA amplification. **(B)** Agarose gel electrophoresis of some of the LAMP assays tested in panel A. F: Female, NT: Non-Template. **(C)** Repetition of AC18 assay D (chosen for the subsequent experiments in the main manuscript) on a female (F) and a male (M) sample with a positive (plasmid containing AC18 fragment) and a negative control. In panel B and C Thermo Scientific GeneRuler 100 bp DNA Ladder was used. Assays U and V are for CHD-F, while the rest of the assay are for AC18.


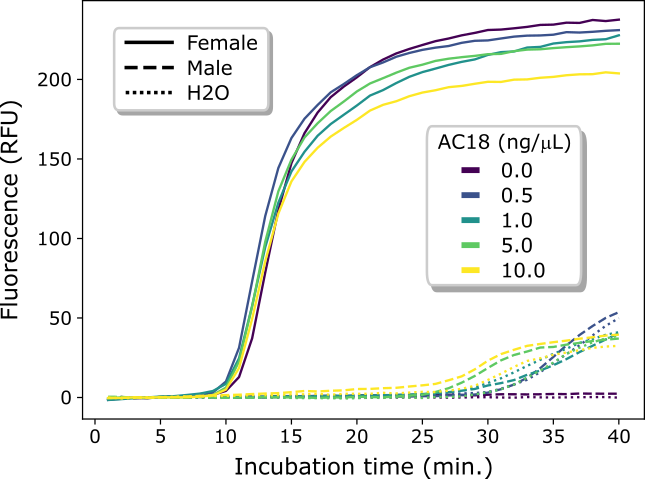


**Figure S7. The addition of AC18 plasmid at different concentration does not perturb the detection of female samples (F37) by LAMP and simultaneously introduces an internal control for male samples (M1).**


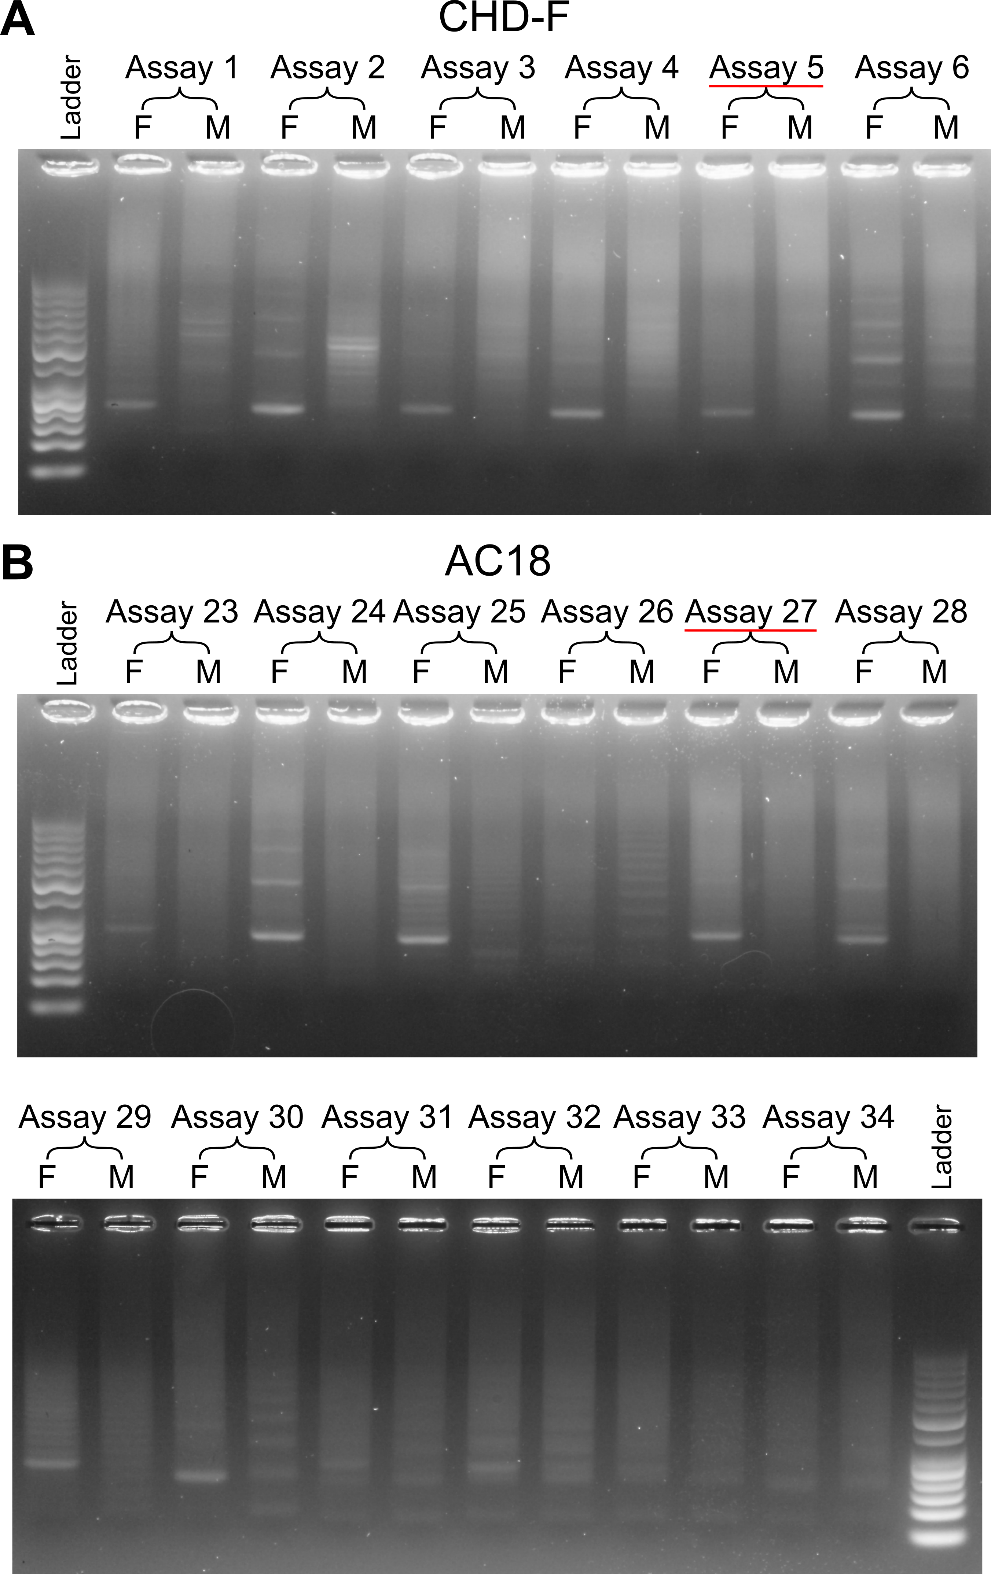


**Figure S8.** **Verification of the new RPA assays**. Examples of the RPA assays to detect **(A)** CHD-F and **(B)** AC18 locus analysed on agarose gel electrophoresis. Assay underlined in red is the ones used for the subsequent experiments (results) in the main text. Thermo Scientific GeneRuler 50 bp DNA Ladder.


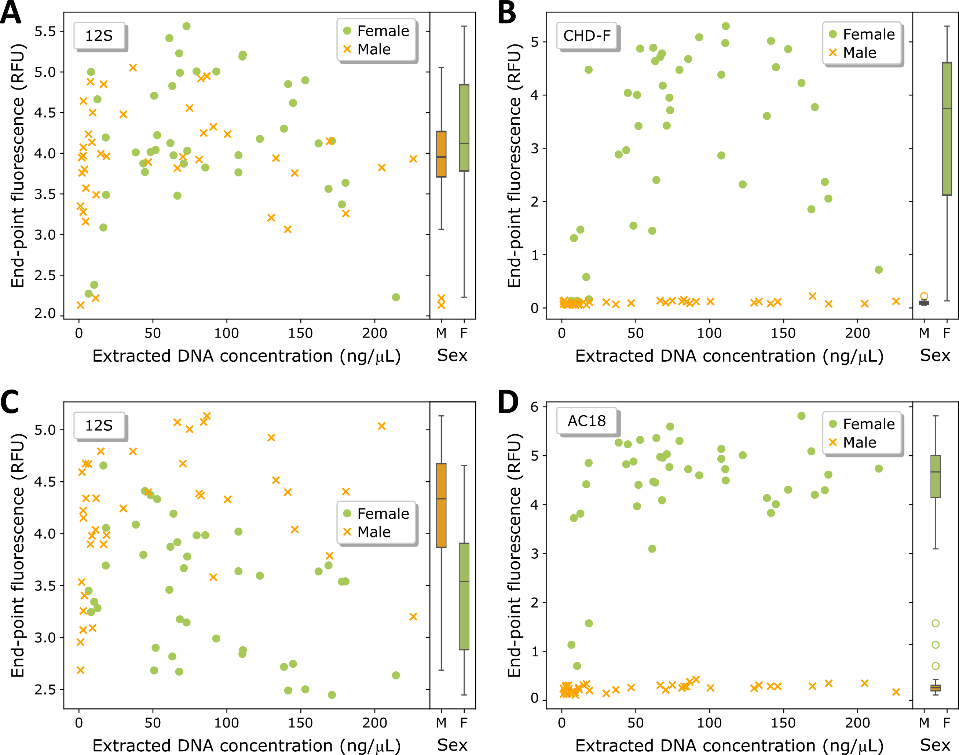


**Figure S9. The concentration of the extracted DNA does not affect RPA amplification any analysed targets.** RPA assay CHD-F with end-point fluorescent values for **(A)** 12S locus and **(B)** CHD-F locus. RPA assay AC18 with end-point fluorescent values for **(C)** 12S locus and **(D)** AC18 locus.


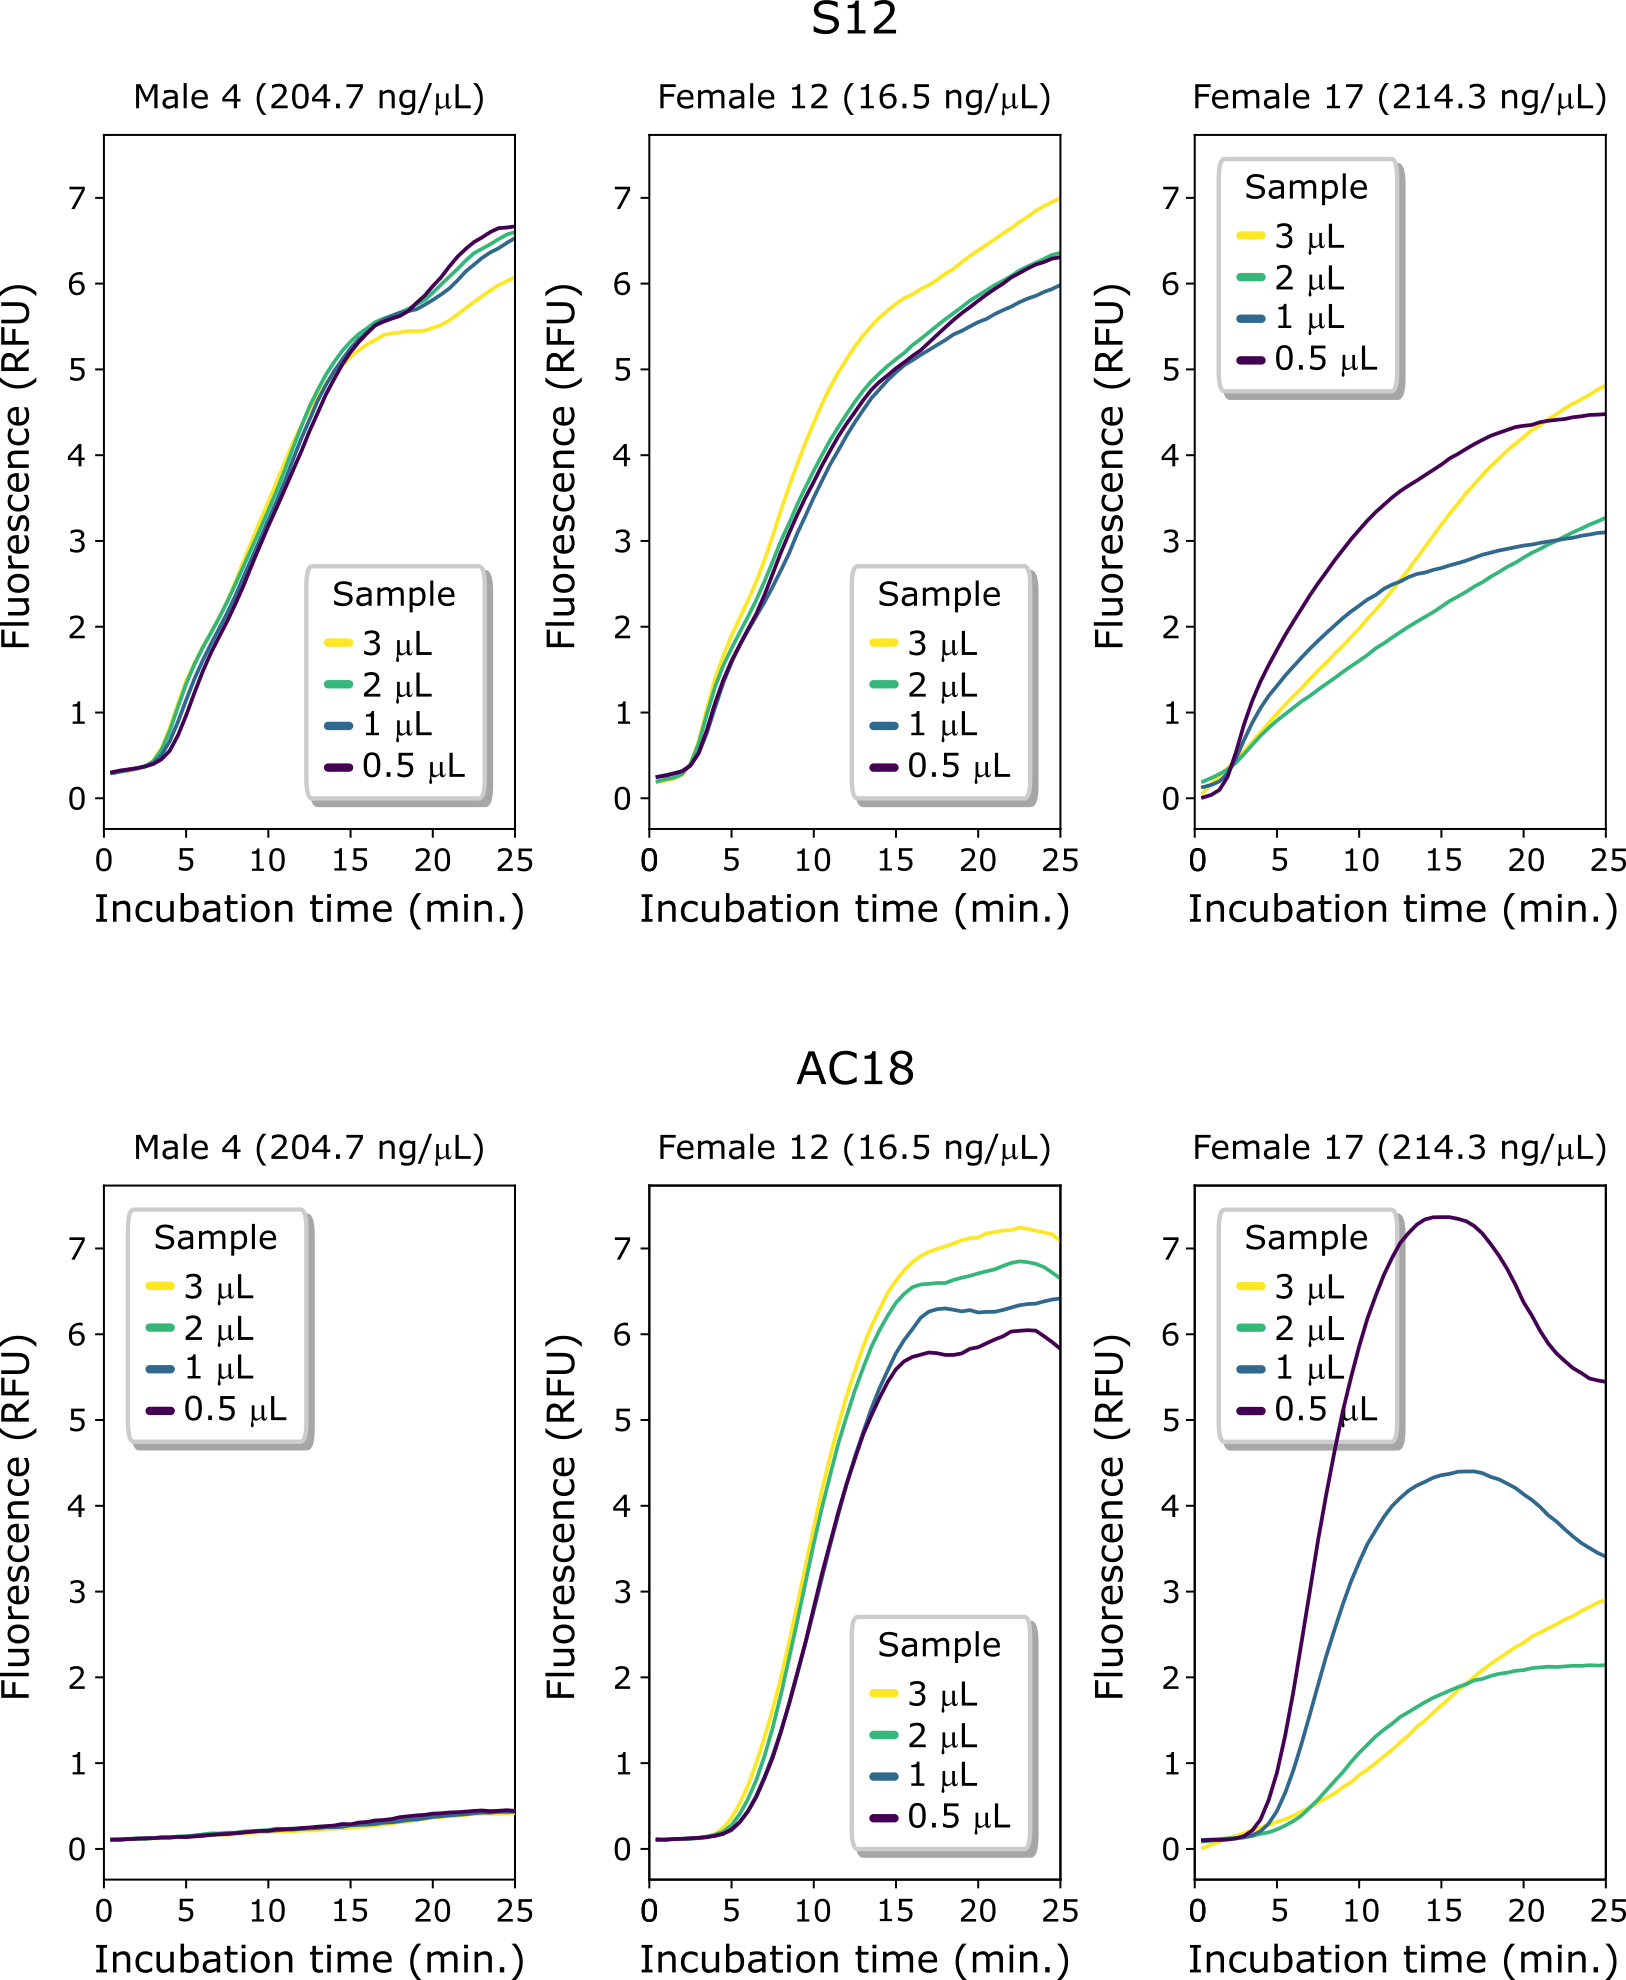


**Figure S10. High DNA input concentrations partially impair AC18 and 12S amplification of RPA assay.** DNA inputs higher than 107.2 ng impair the exponential amplification, however, the AC18 assay is still capable of correctly discern chick sex.


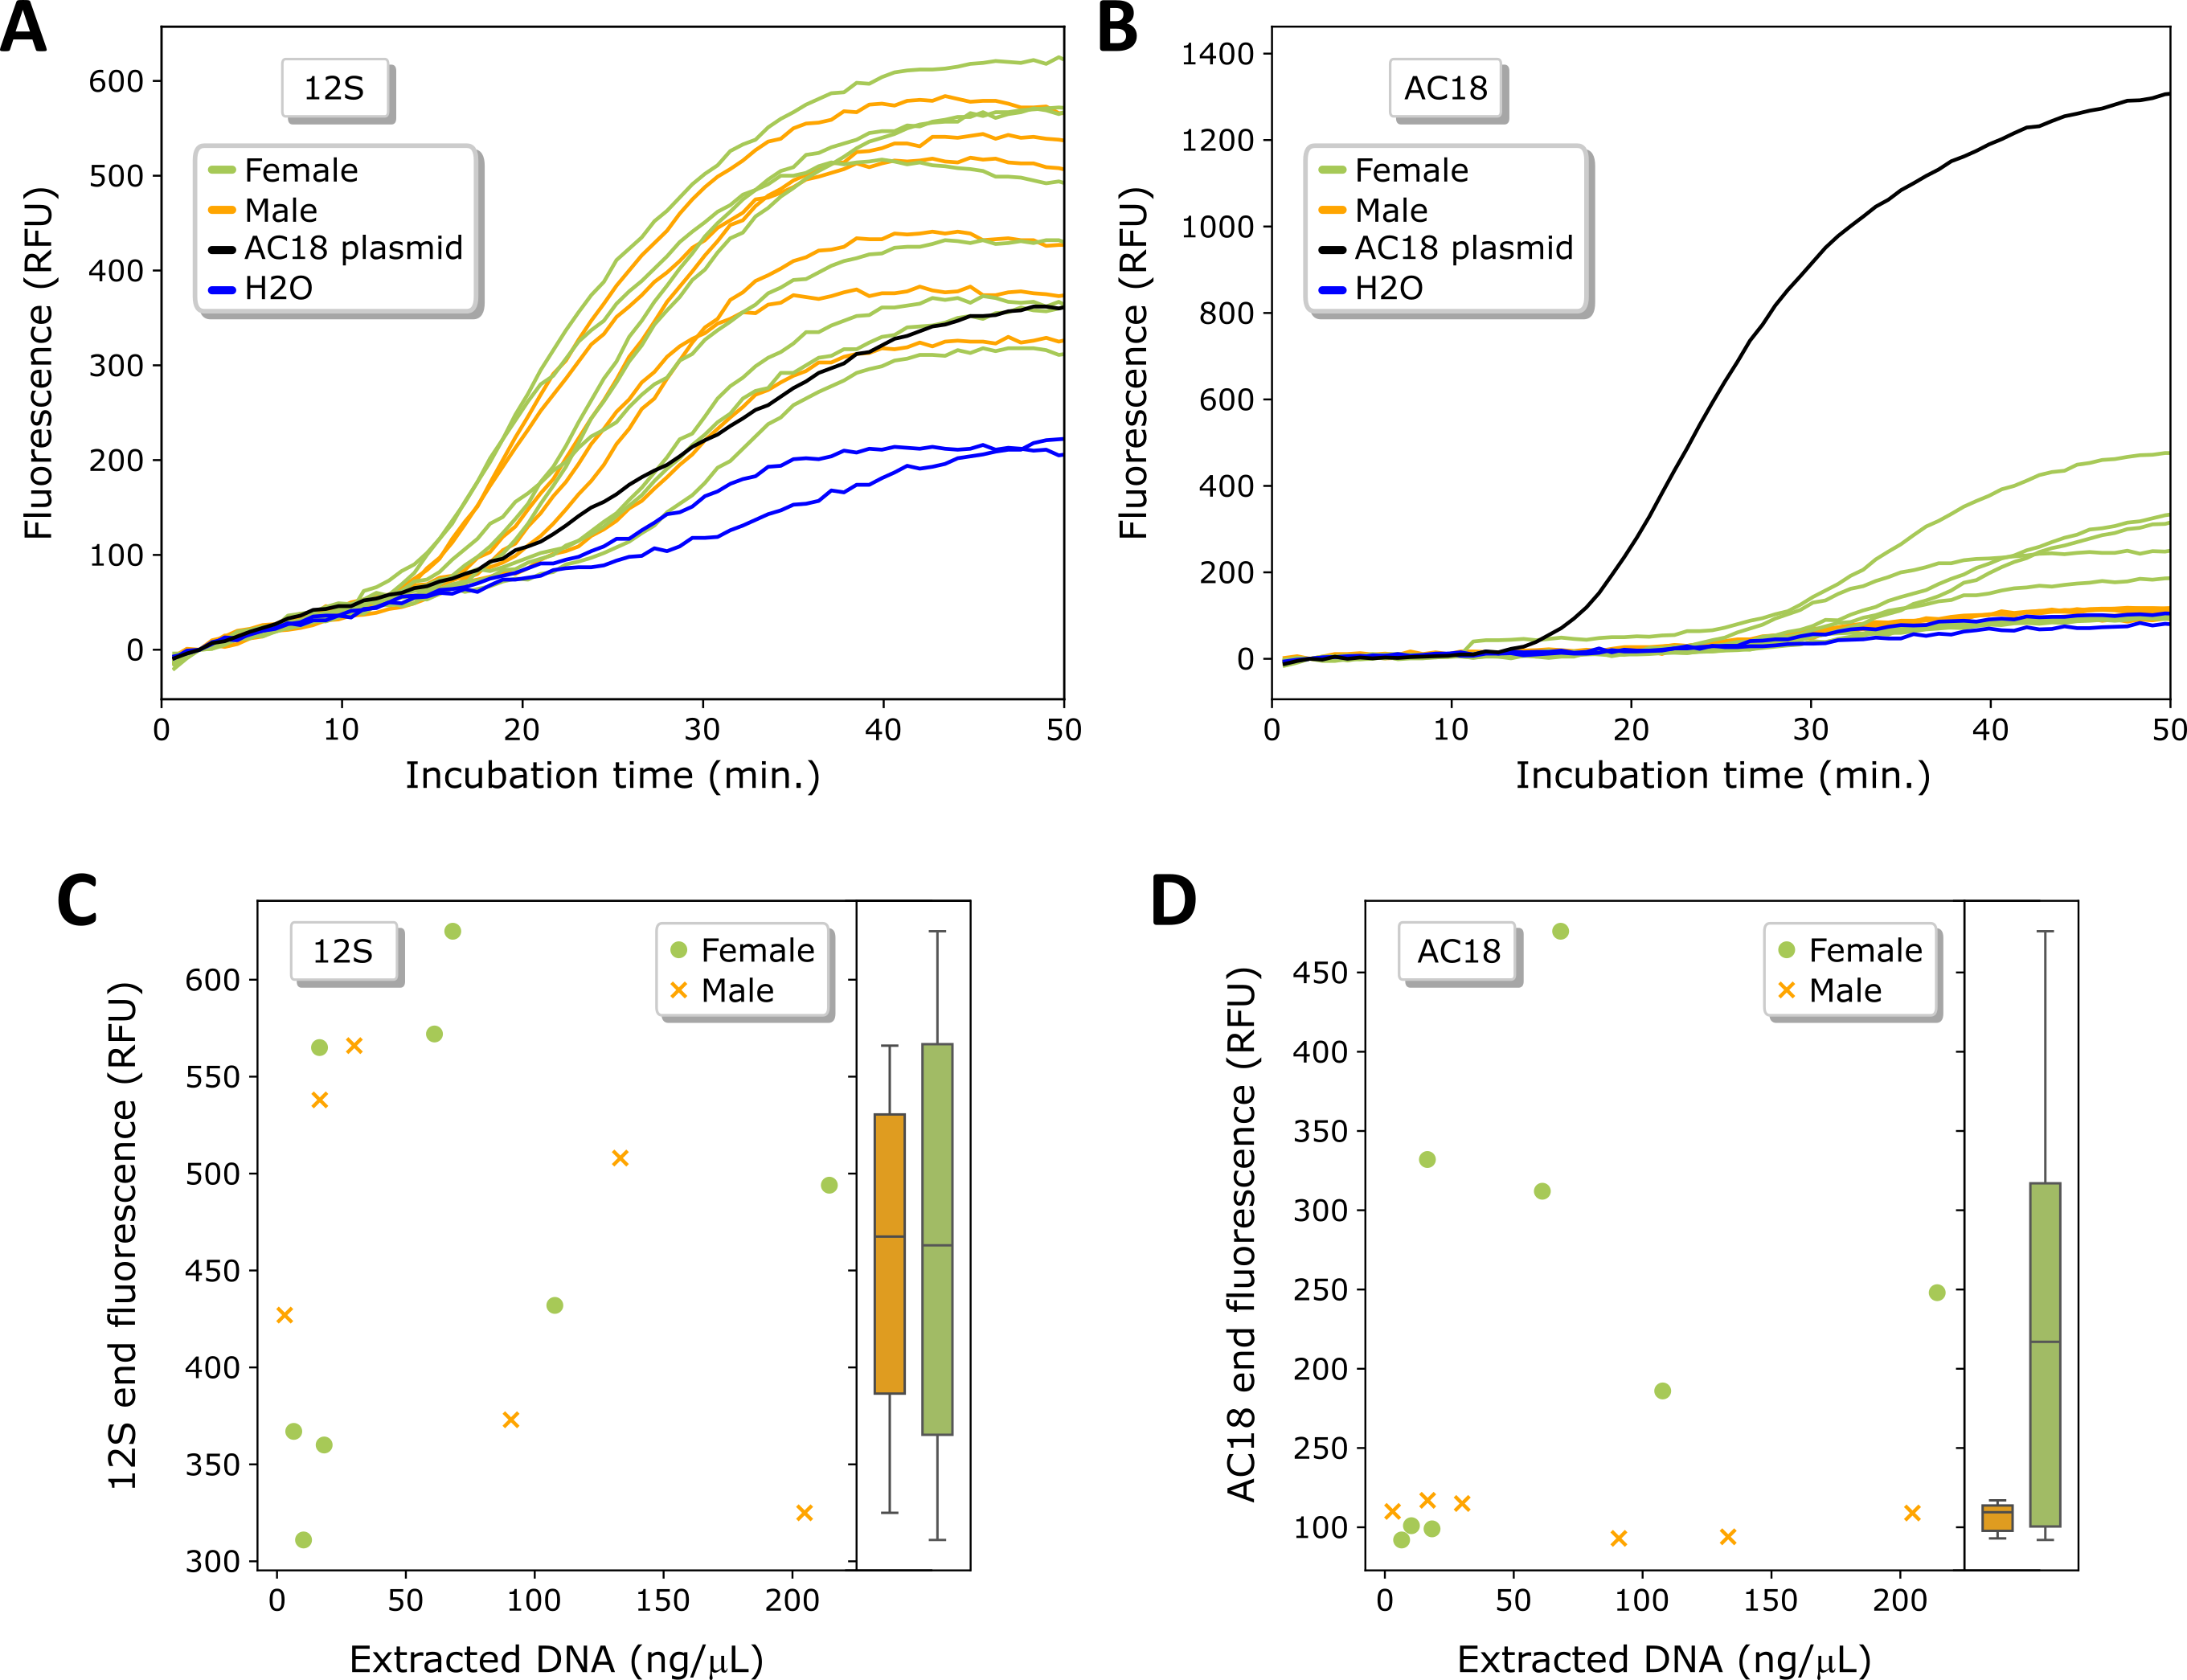


**Figure S11. The RPA assay is capable of discriminating sex chicks at 25°C except for the three samples F1, F2 and F3.** Real-time fluorescence tracking the amplification of the **(A)** 12S locus and the **(B)** AC18 locus of 11 randomly chosen chick samples. End-point fluorescent values of the RPA amplification at 25ºC after 50 minutes for the **(C)** 12S locus and **(D)** AC18 locus.

## Table S1. Sequences of amplicons and primers used in this study. “*” indicate the chosen primers to perform data in the main manuscript.

| **12S fragment (Locus MF041985.1)** | | | |
| --- | --- | --- | --- |
| **Sequence** | CCCACCTAGAGGAGCCTGTTCTATAATCGATAATCCACGATTCACCCAACCACCCCTTGCCAGCACAGCCTACATACCGCCGTCGCCAGCCCACCTCTAATGAAAGAACAACAGTGAGC  TCAATAGCCCCTCGCTAATAAGACAGGTCAAGGTATAGCCTATGGGGTGGGAGAAATGGG | | |
| **Primer ID** | **Sequence (5'->3')** | **Specificity** | **Reaction** |
| F1 | CCCACCTAGAGGAGCCTGTTCTATAATCGATAATC | Male  Female | RPA |
| F2* | CCTGTTCTATAATCGATAATCCACGATTCACCCAAC | Male  Female | RPA |
| R1* | CCCACCCCATAGGCTATACCTTGACCTGTCTTATT | Male  Female | RPA |
| R2 | CCCATTTCTCCCACCCCATAGGCTATACCTTGAC | Male  Female | RPA |
| 12S probe* | AGCCTACATACCGCCGTCGCCAGCCCACC[dTTAMRA]CT[THF]A[BHQ1]  GAAAGAACAACAGTGa[C3-spacer] | Male  Female | RPA |
| **CHD-F fragment (Locus GU132944.1, from 151-326)** | | | |
| **Sequence** | TTGCCACTTTATCTTAAGTAAAAGTGTCCTTTCTGTAGAAAAGACTTCTAAAAGTTTAATTTTATGTATAGAAAAAGACTGGCAATTACTATGGTGTGAGGTGTTGCATTATTCTCCTCCTCCTCCTTCCCCCCCATTCCTCCCCTTGCCCTCAGTTGTTTTGGCAATTGAGTA | | |
| **Primer ID** | **Sequence (5'->3')** | **Specificity** | **Reaction** |
| F1 | TTGCCACTTTATCTTAAGTAAAAGTGTCCTTTCTG | Female | PCR  RPA |
| F2 | TGCCACTTTATCTTAAGTAAAAGTGTCCTTTCTGT | Female | PCR  RPA |
| F3* | CCACTTTATCTTAAGTAAAAGTGTCCTTTCTGTAG | Female | PCR  RPA |
| R1* | TACTCAATTGCCAAAACAACTGAGGGC | Female | PCR  RPA |
| R2 | CAATTGCCAAAACAACTGAGGGCAAGG | Female | PCR  RPA |
| CHD-F Probe* | AAGACTGGCAATTACTATGGTGTGAGGTGT[dT-FAM]G[THF]A[dT-BHQ1]TATTCTCCTCCTCCTC[C3-spacer] | Female | RPA |
| **AC18 fragment (Locus AC182258.2, from 6942-7267)** | | | |
| **Sequence** | CAGGGGCAACAGTCATCCCACAACTAATTGGCAAATGGCTCTCAGAAATTATAGTGCAAACTCCAGTTTTTGTAGCTAAGGGGACATTAATCATATCATTATGGCAAACTGGACCCCCCCCTTTGGTACCTGATATAGTAATGCAACCATCAACATCAGGCCAAAGGGTATGGTATAAGAGACCTGGCATGCTGCTGTGCAAGCAGAAATATTAACG | | |
| **Primer ID** | **Sequence (5'->3')** | **Specificity** | **Reaction** |
| F1 | CAGGGGCAACAGTCATCCCACAACTAATTGGCAAA | Female | PCR  RPA |
| F2* | CAACAGTCATCCCACAACTAATTGGCAAATGGCTC | Female | PCR  RPA |
| F3 | CCCACAACTAATTGGCAAATGGCTCTCAGAAATTA | Female | PCR  RPA |
| F4 | CCCCCTTTGGTACCTGATATAGTAATGCAACCATC | Female | PCR  RPA |
| F5 | CTCTTAGAAACAGGGGCAACAGTCATCCCACAACT | Female | PCR  RPA |
| R1* | CGTTAATATTTCTGCTTGCACAGCAGCATGCCAGG | Female | PCR  RPA |
| R2 | CTGCTTGCACAGCAGCATGCCAGGTCTCTTATACC | Female | PCR  RPA |
| R3 | CACAGCAGCATGCCAGGTCTCTTATACCATACCCT | Female | PCR  RPA |
| R4 | CCCTTTGGCCTGATGTTGATGGTTGCATTAC | Female | PCR  RPA |
| R5 | CCATAGATCTCACGAGGAGTAGAATAAGTGTTTAG | Female | PCR  RPA |
| R6 | AGTAGAATAAGTGTTTAGTTGGTACCAGTATGGGC | Female | PCR  RPA |
| AC18 Probe* | CATTATGGCAAACTGGACCCCCCCCTTTGG[dT-FAM]A[THF]C[BHQ-1]  GATATAGTAATGCAACC[C3-spacer] | Female | RPA |
| L_AC18_I_F* | GTTTTTGTAGCTAAGGGGAC | Female | LAMP |
| L_AC18_III_B* | CCATAGATCTCACGAGGAGTAG | Female | LAMP |
| L_AC18_I_FIP* | GGCCTGATGTTGATGGTTGCATTTTCATTATGGCAAACTGGACC | Female | LAMP |
| L_AC18_III_BIP* | AACGCAAGATAGAAATACCATGTGCTTTTAGTGTTTAGTTGGTACCAGTAT | Female | LAMP |

## Table S2. Summary table of results for the 82 analysed samples with different assays and their extracted DNA concentration

| Internal ID | Reference | Extracted DNA (ng/µL) | PCR | | | LAMP | RPA | |
| --- | --- | --- | --- | --- | --- | --- | --- | --- |
| SWIM | CHD | AC18 | AC18 | CHD | AC18 |
| 523 B7 | M1 | 70.2 | M | M | M | M | M | M |
| 841 A4 | M2 | 133.2 | M | M | M | M | M | M |
| 523 B6 | M3 | 11.3 | M | M | M | M | M | M |
| 523 D6 | M4 | 204.7 | M | M | M | M | M | M |
| 523 A7 | M5 | 18.6 | M | M | M | M | M | M |
| 841 A6 | M6 | 46.8 | M | M | M | M | M | M |
| 841 B1 | M7 | 66.5 | M | M | M | M | M | M |
| 841 C1 | M8 | 14.7 | M | M | M | M | M | M |
| 841 B3 | M9 | 84.3 | M | M | M | M | M | M |
| 841 B7 | M10 | 81.2 | M | M | M | M | M | M |
| 38.2 1 | M11 | 8.8 | M | M | M | M | M | M |
| 38.2 3 | M12 | 11.6 | M | M | M | M | M | M |
| 38.2 6 | M13 | 4.5 | M | M | M | M | M | M |
| 38.2 8 | M14 | 2.8 | M | M | M | M | M | M |
| 38.2 10 | M15 | 4.7 | M | M | M | M | M | M |
| 38.2 11 | M16 | 2.1 | M | M | M | M | M | M |
| 38.2 13 | M17 | 6.4 | M | M | M | M | M | M |
| 38.2 14 | M18 | 3 | M | M | M | M | M | M |
| 38.2 15 | M19 | 30 | M | M | M | M | M | M |
| 38.2 16 | F38 | 12.5 | F | F | F | F | F | F |
| 38.2 17 | M20 | 1.1 | M | M | M | M | M | M |
| 38.2 19 | F39 | 8.1 | F | F | F | F | F | F |
| 38.2 20 | M21 | 1.8 | M | M | M | M | M | M |
| 38.2 25 | M22 | 7.8 | M | M | M | M | M | M |
| 38.2 26 | M23 | 16.6 | M | M | M | M | M | M |
| 38.2 27 | M24 | 3.7 | M | M | M | M | M | M |
| 38.2 30 | M25 | 1 | M | M | M | M | M | M |
| 38.2 32 | M26 | 9.2 | M | M | M | M | M | M |
| 38.2 35 | M27 | 2.9 | M | M | M | M | M | M |
| 38.2 36 | M28 | 2.8 | M | M | M | M | M | M |
| 38.2 37 | M29 | 226 | M | M | M | M | M | M |
| 38.2 41 | F40 | 63.1 | F | F | F | F | F | F |
| 38.2 42 | M30 | 90.8 | M | M | M | M | M | M |
| 38.2 44 | F41 | 180.2 | F | F | F | F | F | F |
| 38.2 46 | M31 | 141.1 | M | M | M | M | M | M |
| 38.2 47 | M32 | 145.9 | M | M | M | M | M | M |
| 38.2 48 | M33 | 74.7 | M | M | M | M | M | M |
| 38.2 49 | F42 | 177.8 | F | F | F | F | F | F |
| 38.2 50 | M34 | 180.4 | M | M | M | M | M | M |
| 38.2 51 | M35 | 86.5 | M | M | M | M | M | M |
| 38.2 54 | M36 | 130 | M | M | M | M | M | M |
| 38.2 56 | M37 | 100.5 | M | M | M | M | M | M |
| 38.2 57 | M38 | 169.4 | M | M | M | M | M | M |
| 38.2 58 | M39 | 82.5 | M | M | M | M | M | M |
| 841 C3 | M40 | 36.5 | M | M | M | M | M | M |
| 523 C6 | F1 | 10.3 | F | F | F | **M** | **M** | F |
| 523 A6 | F2 | 6.5 | F | F | F | F | **M** | F |
| 523 C7 | F3 | 18.3 | F | F | F | F | **M** | F |
| 841 A1 | F4 | 43.5 | F | F | F | F | F | F |
| 841 A2 | F5 | 70.9 | F | F | F | F | F | F |
| 841 A3 | F6 | 63.9 | F | F | F | F | F | F |
| 841 A5 | F7 | 73.2 | F | F | F | F | F | F |
| 841 A7 | F8 | 48.4 | F | F | F | F | F | F |
| 841 B2 | F9 | 61.8 | F | F | F | F | F | F |
| 841 B4 | F10 | 18.1 | F | F | F | F | F | F |
| 841 C6 | F11 | 107.8 | F | F | F | F | F | F |
| 841 B5 | F12 | 16.5 | F | F | F | F | F | F |
| 841 B6 | F13 | 38.4 | F | F | F | F | F | F |
| 841 C2 | F14 | 44.6 | F | F | F | F | F | F |
| 841 C4 | F15 | 66.5 | F | F | F | F | F | F |
| 841 C5 | F16 | 52.9 | F | F | F | F | F | F |
| 38.2 2 | F17 | 214.3 | F | F | F | F | F | F |
| 38.2 5 | F18 | 85.4 | F | F | F | F | F | F |
| 38.2 7 | F19 | 153 | F | F | F | F | F | F |
| 38.2 9 | F20 | 79.5 | F | F | F | F | F | F |
| 38.2 18 | F21 | 67.7 | F | F | F | F | F | F |
| 38.2 21 | F22 | 138.6 | F | F | F | F | F | F |
| 38.2 22 | F23 | 61.1 | F | F | F | F | F | F |
| 38.2 23 | F24 | 72.7 | F | F | F | F | F | F |
| 38.2 24 | F25 | 51.8 | F | F | F | F | F | F |
| 38.2 29 | F26 | 92.8 | F | F | F | F | F | F |
| 38.2 31 | F27 | 50.8 | F | F | F | F | F | F |
| 38.2 33 | F28 | 162 | F | F | F | F | F | F |
| 38.2 34 | F29 | 144.7 | F | F | F | F | F | F |
| 38.2 38 | F30 | 141.4 | F | F | F | F | F | F |
| 38.2 39 | F31 | 68.2 | F | F | F | F | F | F |
| 38.2 40 | F32 | 110.8 | F | F | F | F | F | F |
| 38.2 43 | F33 | 171 | F | F | F | F | F | F |
| 38.2 45 | F34 | 110.5 | F | F | F | F | F | F |
| 38.2 53 | F35 | 107.8 | F | F | F | F | F | F |
| 38.2 55 | F36 | 122.3 | F | F | F | F | F | F |
| 38.2 59 | F37 | 168.7 | F | F | F | F | F | F |
