# Supplementary material for: Molecular sexing of chick embryos by LAMP and RPA assays: a step toward in ovo egg sexing
Source: Research Square preprint supplement (doi:10.21203/rs.3.rs-5772672/v1), 2025-01-13
Supplement: Supplementary file 2 [file 5803cd82f7e8a461e674adb4.xlsx]

## Sheet: Figure 1 (CHD-F)
ID	Identifier	Band 1 (bp)	[Band 1] (ng/µL)	Band 2 (bp)	[Band 2] (ng/µL)
523 B7	M1	139	9.74
841 A4	M2	142	12.82
523 B6	M3	145	7.11
523 D6	M4	151	4.58
523 A7	M5	157	6.13
841 A6	M6	163	12.44
841 B1	M7	140	17.24
841 C1	M8	137	22.62
841 B3	M9	136	16.79
841 B7	M10	135	17.49
38.2 1	M11	134	12.29
38.2 3	M12	134	14.14
38.2 6	M13	139	9.96
38.2 8	M14	139	10.02
38.2 10	M15	139	10.45
38.2 11	M16	138	7.85
38.2 13	M17	138	13.61
38.2 14	M18	137	9.37
38.2 15	M19	140	14.82
38.2 16	F38	141	6.93	179	11.08
38.2 17	M20	139	1.91
38.2 19	F39	141	5.34	179	11.26
38.2 20	M21	138	5.93
38.2 25	M22	136	11.6
38.2 26	M23	138	14.86
38.2 27	M24	137	8.3
38.2 30	M25	137	6.47
38.2 32	M26	138	12.55
38.2 35	M27	138	7.67
38.2 36	M28	137	6.9
38.2 37	M29	139	13.67
38.2 41	F40	142	7.93	178	12.94
38.2 42	M30	139	17.48
38.2 44	F41	142	6.62	179	14.03
38.2 46	M31	139	30.31
38.2 47	M32	139	18.53
38.2 48	M33	140	12.91
38.2 49	F42	142	5.71	179	14.19
38.2 50	M34	140	15.16
38.2 51	M35	139	15.71
38.2 54	M36	139	18.45
38.2 56	M37	139	15.11
38.2 57	M38	140	13.77
38.2 58	M39	141	12.25
841 C3	M40	139	10.26
523 C6	F1	140	7.93	178	4.94
523 A6	F2	140	0.39	178	2.76
523 C7	F3	141	1.65	179	5.96
841 A1	F4	142	5.77	179	11.93
841 A2	F5	143	3.45	179	12.74
841 A3	F6	143	3.17	180	10.43
841 A5	F7	143	1.49	179	10.73
841 A7	F8	142	1.57	179	9.51
841 B2	F9	141	4.19	178	11.05
841 B4	F10	140	3.12	177	10.62
841 C6	F11	140	3.94	177	11.71
841 B5	F12	140	2.33	177	9.06
841 B6	F13	140	2.88	177	9.39
841 C2	F14	143	1.98	179	9.09
841 C4	F15	143	1.5	179	10.62
841 C5	F16	143	5.9	179	7.89
38.2 2	F17	143	6.27	179	10.57
38.2 5	F18	143	3.11	179	9.47
38.2 7	F19	143	5.31	180	9.65
38.2 9	F20	143	4.68	180	7.75
38.2 18	F21	143	4.25	180	6.99
38.2 21	F22	143	2.06	180	9.14
38.2 22	F23	143	3.7	180	6.97
38.2 23	F24	143	3.83	180	9.67
38.2 24	F25	143	3.67	179	10.56
38.2 29	F26	143	2.06	180	9.77
38.2 31	F27	144	3.85	180	8.07
38.2 33	F28	144	3.17	181	8.53
38.2 34	F29	144	5.4	181	7.64
38.2 38	F30	145	2.74	180	9.31
38.2 39	F31	145	4.28	181	8.76
38.2 40	F32	140	10.49	179	8.47
38.2 43	F33	141	11.81	180	9.05
38.2 45	F34	142	5.07	179	9.2
38.2 53	F35	143	4.92	180	9.3
38.2 55	F36	142	7.02	180	8.44
38.2 59	F37	142	5.4	179	9.62
	H2O
	H2O

## Sheet: Figure 1 (AC18)
ID	Identifier	Band 1 (bp)	[Band 1] (ng/µL)	Band 2 (bp)	[Band 2] (ng/µL)
523 B7	M1	139	15.24
841 A4	M2	143	20.72
523 B6	M3	148	4.5
523 D6	M4	154	3.23
523 A7	M5	160	4.44
841 A6	M6	163	14.33
841 B1	M7	138	29.14
841 C1	M8	136	1.23
841 B3	M9	135	17.41
841 B7	M10	134	17.19
38.2 1	M11	134	10.72
38.2 3	M12	134	13
38.2 6	M13	139	8.71
38.2 8	M14	139	9.07
38.2 10	M15	139	10.19
38.2 11	M16	137	16.61
38.2 13	M17	137	10.2
38.2 14	M18	137	16.16
38.2 15	M19	140	13.68
38.2 16	F38	141	10.61	229	14.9
38.2 17	M20	139	1.12
38.2 19	F39	141	9.86	229	15.39
38.2 20	M21	137	5.05
38.2 25	M22	135	14.58
38.2 26	M23	137	12.9
38.2 27	M24	137	8.08
38.2 30	M25	138	2.5
38.2 32	M26	138	9.15
38.2 35	M27	138	6.93
38.2 36	M28	136	6.3
38.2 37	M29	139	14.74
38.2 41	F40	141	13.14	228	24.9
38.2 42	M30	138	38.43
38.2 44	F41	143	12.24	229	25.87
38.2 46	M31	138	29.26
38.2 47	M32	139	13.18
38.2 48	M33	140	12.33
38.2 49	F42	143	12.04	230	25.17
38.2 50	M34	140	15.8
38.2 51	M35	139	15.64
38.2 54	M36	140	15.88
38.2 56	M37	139	14.97
38.2 57	M38	141	13.42
38.2 58	M39	140	11.66
841 C3	M40	139	10.92
523 C6	F1	139	11.2	228	1.72
523 A6	F2	139	0.47	227	0.38
523 C7	F3	140	5.19	228	3
841 A1	F4	142	10.39	229	23.39
841 A2	F5	143	8.82	230	21.9
841 A3	F6	143	8.25	230	18.21
841 A5	F7	143	7.56	230	21.39
841 A7	F8	141	7.22	228	17.78
841 B2	F9	141	9.05	228	21.86
841 B4	F10	139	7.56	227	15.74
841 C6	F11	140	8.96	228	20.36
841 B5	F12	139	7.63	227	14.56
841 B6	F13	139	8.23	227	19.27
841 C2	F14	143	6.64	230	17.23
841 C4	F15	143	5.39	230	16.78
841 C5	F16	143	10.06	230	17.28
38.2 2	F17	143	13.9	229	22.17
38.2 5	F18	143	8.04	229	16.97
38.2 7	F19	143	8.99	229	15.36
38.2 9	F20	143	7.67	231	15.56
38.2 18	F21	142	8.18	231	9.53
38.2 21	F22	143	6.94	231	17.23
38.2 22	F23	142	7.12	230	7.76
38.2 23	F24	143	8.67	231	17.43
38.2 24	F25	140	9.8	228	8.44
38.2 29	F26	143	7.07	230	17.87
38.2 31	F27	144	8.78	230	14.75
38.2 33	F28	144	7.71	231	15.72
38.2 34	F29	144	9.19	231	14.34
38.2 38	F30	145	7.52	230	16.16
38.2 39	F31	144	8.84	230	12.3
38.2 40	F32	142	13.91	229	19.33
38.2 43	F33	143	13.12	230	17.45
38.2 45	F34	142	10.25	229	19.47
38.2 53	F35	143	8.72	230	16.17
38.2 55	F36	142	10.87	230	13.09
38.2 59	F37	142	10.47	229	18.08
	H2O
	H2O

## Sheet: Figure 2 (SWIM)
ID	Identifier	Band 1 (bp)	[Band 1] (ng/µL)	Band 2 (bp)	[Band 2] (ng/µL)
523 B7	M1	144	5.03
841 A4	M2	145	5.54
523 B6	M3	145	4.11
523 D6	M4	146	4.41
523 A7	M5	146	4.04
841 A6	M6	146	4.59
841 B1	M7	146	4.6
841 C1	M8	147	4.73
841 B3	M9	147	5.18
841 B7	M10	148	5.24
38.2 1	M11	148	4.54
38.2 3	M12	149	4.87
38.2 6	M13	145	4.32
38.2 8	M14	145	3.88
38.2 10	M15	145	4.08
38.2 11	M16	146	3.95
38.2 13	M17	147	4.47
38.2 14	M18	147	4.28
38.2 15	M19	147	4.81
38.2 16	F38	147	4.28	229	2.55
38.2 17	M20	147	3.05
38.2 19	F39	149	4.12	230	2.85
38.2 20	M21	148	3.38
38.2 25	M22	149	4.63
38.2 26	M23	145	4.17
38.2 27	M24	145	3.43
38.2 30	M25	145	3.23
38.2 32	M26	146	3.77
38.2 35	M27	147	3.62
38.2 36	M28	147	3.5
38.2 37	M29	148	4.07
38.2 41	F40	148	3.94	230	3.42
38.2 42	M30	148	4.18
38.2 44	F41	149	4.08	230	4.21
38.2 46	M31	149	4.74
38.2 47	M32	149	4.08
38.2 48	M33	145	4.69
38.2 49	F42	146	4.52	227	4.6
38.2 50	M34	146	5.02
38.2 51	M35	146	4.29
38.2 54	M36	147	5.07
38.2 56	M37	148	4.82
38.2 57	M38	148	4.86
38.2 58	M39	148	4.7
841 C3	M40	149	4.68
523 C6	F1	149	3.66	232	0.92
523 A6	F2	151	2.12	232	0.59
523 C7	F3	151	3.31	233	0.87
841 A1	F4	146	4.56	229	4.32
841 A2	F5	146	3.85	228	4.03
841 A3	F6	147	3.89	229	2.73
841 A5	F7	147	3.92	230	4.37
841 A7	F8	147	3.54	230	2.05
841 B2	F9	148	3.66	230	2.87
841 B4	F10	149	3.4	232	2.95
841 C6	F11	149	3.92	232	3.46
841 B5	F12	149	4.84	232	3
841 B6	F13	150	3.91	232	2.76
841 C2	F14	150	3.83	233	3.43
841 C4	F15	152	4.44	234	4.79
841 C5	F16	146	4.38	228	3.38
38.2 2	F17	146	4.66	229	4.65
38.2 5	F18	147	4.67	229	4.75
38.2 7	F19	147	4.27	230	3.2
38.2 9	F20	148	5.49	230	4.91
38.2 18	F21	149	4.43	231	3.21
38.2 21	F22	149	4.53	231	4.98
38.2 22	F23	150	4.67	233	2.88
38.2 23	F24	150	4.34	232	4.33
38.2 24	F25	152	4.17	233	4.19
38.2 29	F26	152	4.08	234	4.46
38.2 31	F27	152	4.43	234	3.96
38.2 33	F28	147	4.56	230	4.6
38.2 34	F29	148	4.33	230	4.07
38.2 38	F30	149	4	231	4.46
38.2 39	F31	149	4.74	232	3.68
38.2 40	F32	150	4.55	232	4.41
38.2 43	F33	149	4.87	233	4.09
38.2 45	F34	151	4.22	233	3.71
38.2 53	F35	151	3.97	233	3.39
38.2 55	F36	151	4.63	234	3.88
38.2 59	F37	152	5.66	235	5.23
	H2O	152	0.08
	H2O

## Sheet: Figure 3
ID	Identifier	1st exp. (Ct)	2n exp. (Ct)	3rd exp. (Ct)	4th exp. (Ct)	5th exp. (Ct)
523 B7	M1	0	0	0
841 A4	M2	0	0	0
523 B6	M3	0	0	0
523 D6	M4	0	0	0
523 A7	M5	0	0	0
841 A6	M6	0	0	0
841 B1	M7	0	0	0
841 C1	M8	0	0	0
841 B3	M9	0	0	0
841 B7	M10	0	0	0
38.2 1	M11	0	0	0
38.2 3	M12	0	0	0
38.2 6	M13	0	0	0
38.2 8	M14	0	0	0
38.2 10	M15	0	0	0
38.2 11	M16	0	0	0
38.2 13	M17	0	0	0
38.2 14	M18	0	0	0
38.2 15	M19	0	0	0
38.2 16	F38	15.05	14.49	15.83
38.2 17	M20	0	0	0
38.2 19	F39	14.72	13.74	15.34
38.2 20	M21	0	0	0
38.2 25	M22	0	0	0
38.2 26	M23	0	0	0
38.2 27	M24	0	0	0
38.2 30	M25	0	0	0
38.2 32	M26	0	0	0
38.2 35	M27	0	0	0
38.2 36	M28	0	0	0
38.2 37	M29	0	0	0
38.2 41	F40	12.94	11.54	13.84
38.2 42	M30	0		0
38.2 44	F41	11.86	14.25	10.48
38.2 46	M31	0	0	0
38.2 47	M32	0	0	0
38.2 48	M33	0	0	0
38.2 49	F42	11.97	14.58	10.64
38.2 50	M34	0	0	0
38.2 51	M35	0	0	0
38.2 54	M36	0	0	0
38.2 56	M37	0	0	0
38.2 57	M38	0	0	0
38.2 58	M39	0	0	0
841 C3	M40	0	0	0
523 C6	F1	0	0	0
523 A6	F2		16.79	25.71	17.47	19.13
523 C7	F3		17.81	21.48	17.44	16.34
841 A1	F4		12.24	15.1	10.66
841 A2	F5		11.7	14.1	9.87
841 A3	F6		13.06	15.54	10.86
841 A5	F7		11.95	14.69	10.19
841 A7	F8		14.05	16.52	11.87
841 B2	F9		12.66	15	10.75
841 B4	F10		13.22	15.52	10.98
841 C6	F11		11.84	14.21	10.08
841 B5	F12	13.21	13.52	15.48
841 B6	F13	13.62	13.25	15.55
841 C2	F14	13.07	12.94	15.14
841 C4	F15	12.72	12.6	14.57
841 C5	F16	13.68	13.2	15.82
38.2 2	F17	13.5	12.24	15.43
38.2 5	F18	13.06	12.49	14.98
38.2 7	F19	14.45	13.05	16.15
38.2 9	F20	13.97	13.1	16.04
38.2 18	F21	15.82	14.66	18.1
38.2 21	F22	13.15	12.5	15.01
38.2 22	F23	15.1	14.6	16.95
38.2 23	F24	13.49	12.74	15.7
38.2 24	F25	13.21	12.73	15.66
38.2 29	F26	13.01	12.35	15.35
38.2 31	F27	13.88	12.79	16.28
38.2 33	F28	13.44	12.51	15.52
38.2 34	F29	14.03	12.61	16.28
38.2 38	F30	13.7	12.55	16.44
38.2 39	F31	15.12	13.97		11.45
38.2 40	F32	14.04	13.1		10.63
38.2 43	F33	14.54	13.72		10.79
38.2 45	F34	13.99	12.84		10.68
38.2 53	F35	13.71	12.5		10.28
38.2 55	F36	14.44			11
38.2 59	F37	13.74			10.43
	H2O	0	0	0	0	0
	AC18	26.96		30.86	27.87

## Sheet: Figure 4 (CHD-F)
S12 Gene
	H2O control				Males																																									Female
Time (min)	1	2	3		1	2	3	4	5	6	7	8	9	10	11	12	13	14	15	16	17	18	19	20	21	22	23	24	25	26	27	28	29	30	31	32	33	34	35	36	37	38	39	40		1	2	3	4
0.5	-0.0608307	-0.0692419	-0.0408416		-0.0634648	-0.299616	-0.0525537	-0.0806841	-0.062783	-0.090454	-0.123205	-0.0659763	-0.170153	-0.104779	-0.05631	-0.0729571	-0.0450638	-0.0478063	-0.0628973	-0.0611419	-0.0612521	-0.0611421	-0.123973	-0.0481502	-0.0684576	-0.0662542	-0.0753173	-0.0479397	-0.0572249	-0.0474048	-0.057782	-0.0726081	-0.174041	-0.15712	-0.228586	-0.2756	-0.0984387	-0.306394	-0.190094	-0.244547	-0.25668	-0.295719	-0.109718	-0.0852025		-0.0534757	-0.0594504	-0.0623753	-0.160572
1	-0.03512	-0.0457401	-0.0386606		-0.0404326	-0.272516	-0.0295559	0.0161211	-0.0441246	-0.0743614	-0.108573	-0.0431561	-0.151634	-0.0872347	-0.0338921	-0.0533988	-0.0286899	-0.0313519	-0.0444441	-0.0425265	-0.0359468	-0.0332007	-0.0963558	-0.015639	-0.0408661	-0.0340945	-0.0384042	-0.0158506	-0.0254508	-0.0331817	-0.0305966	-0.0367518	-0.159687	-0.142686	-0.191907	-0.239077	-0.0620112	-0.287048	-0.153248	-0.224973	-0.219461	-0.223998	-0.090263	-0.0657643		-0.0332063	-0.038575	-0.0392224	-0.143092
1.5	-0.015835	-0.0132731	-0.0193466		-0.0155462	-0.231379	-0.0110764	-0.0779352	-0.021115	-0.0520164	-0.0870091	-0.0249164	-0.125427	-0.0697808	-0.022331	-0.0376846	-0.0142737	-0.016862	-0.0191429	-0.0170137	-0.0235522	-0.0184785	-0.0686068	-0.0139148	-0.0174931	-0.0281405	-0.0366108	-0.0190747	-0.0198185	-0.0188594	-0.0292412	-0.00506717	-0.132206	-0.123735	-0.155508	-0.185564	-0.0775535	-0.23358	-0.099382	-0.188215	-0.164841	-0.222382	-0.0365441	-0.0294829		-0.0148976	-0.015296	-0.0149105	-0.114616
2	0.00230059	-0.00683313	0.0174171		0.000399863	-0.131027	0.00241526	0.0192591	-0.00432733	-0.0314516	-0.0519393	-0.00462712	-0.0821834	-0.0425854	-0.00305242	-0.0174573	0.0027523	-0.00101495	-0.00632592	-0.0034424	-0.00270032	0.00110414	-0.0360162	-0.012402	-0.00237659	0.000239313	-0.000185881	0.00463401	-0.000681877	-0.00850809	0.0028072	0.00109186	-0.0781899	-0.0689958	-0.0842556	-0.0801517	0.0101111	-0.0765584	-0.0803454	-0.0812854	-0.0925523	-0.115972	-0.000227923	0.00669597		0.00163037	0.00250383	0.000251501	-0.0749007
2.5	0.0195465	0.0344415	0.00190312		0.0154255	0.124731	0.0124943	-0.0115322	0.0192087	0.017501	0.0270278	0.0147614	0.0454123	0.0190889	0.0179016	0.0145657	0.0139144	0.0120961	0.0125667	0.0162476	0.0127633	0.015753	0.022597	0.0201243	0.0296731	0.0148861	0.0193613	0.0146211	0.0136382	0.0188061	0.0257447	0.0110655	0.0623985	0.0518096	0.0750172	0.11267	-0.00511858	0.150507	0.0262408	0.131901	0.0867333	0.113746	0.0540077	0.00886909		0.0147839	0.0206764	0.0157838	0.0405419
3	0.0291078	0.0314048	0.038687		0.0401535	0.510191	0.0257228	0.0540872	0.0503582	0.140328	0.220494	0.0579381	0.313833	0.180512	0.041374	0.093975	0.026297	0.0371329	0.0573461	0.0467349	0.0494359	0.034822	0.178382	0.0218315	0.0310627	0.0471096	0.0558395	0.0156702	0.0323129	0.0417432	0.0312858	0.0296616	0.307684	0.283607	0.356654	0.392123	0.134572	0.446679	0.306735	0.362573	0.390121	0.448606	0.0730273	0.0796822		0.0316897	0.0306907	0.0380976	0.292067
3.5	0.0474632	0.0590515	0.0401665		0.0764783	0.829863	0.0350111	0.0549536	0.114542	0.372823	0.682838	0.149375	0.674453	0.504305	0.0793949	0.261295	0.0549613	0.0753188	0.15711	0.101996	0.116964	0.0759646	0.426863	0.0540879	0.0496258	0.0834492	0.179602	0.0387049	0.055138	0.077518	0.058259	0.0523181	0.63576	0.599714	0.638736	0.672008	0.360903	0.639346	0.605106	0.664076	0.729526	0.784003	0.144189	0.219805		0.0465979	0.0499531	0.07272	0.608816
4	0.0573213	0.0733375	0.0591202		0.159487	1.0569	0.0498733	0.08804	0.215565	0.668536	0.990065	0.338092	0.986372	0.891443	0.172064	0.516608	0.0998737	0.166967	0.347338	0.210701	0.266273	0.112613	0.72864	0.023767	0.0725094	0.128578	0.355809	0.075061	0.0471185	0.152561	0.0721494	0.0662343	0.903119	0.853994	0.833391	0.934733	0.673953	0.832075	0.921199	0.860013	1.0337	1.01433	0.30235	0.463953		0.0613276	0.0615084	0.148786	0.871287
4.5	0.0725381	0.0793031	0.0603401		0.324337	1.22414	0.0611188	0.0891552	0.357202	0.916558	1.20589	0.64425	1.22089	1.19834	0.349326	0.758678	0.184822	0.332212	0.609745	0.368988	0.511635	0.216965	0.960839	0.0877222	0.135454	0.218526	0.602145	0.120808	0.0879672	0.333097	0.134404	0.111111	1.11502	1.04725	1.01067	1.05852	0.952739	0.9729	1.18524	0.950205	1.21365	1.19213	0.425798	0.760409		0.0838859	0.089598	0.272464	1.05776
5	0.0809144	0.0803842	0.0967382		0.592497	1.35972	0.079021	0.154222	0.521463	1.09521	1.34814	0.992137	1.39472	1.41513	0.604164	0.93518	0.318082	0.552134	0.857319	0.553782	0.813567	0.365865	1.10862	0.0885855	0.206822	0.352361	0.866079	0.179654	0.0976622	0.557232	0.209426	0.168709	1.27848	1.20013	1.17035	1.25181	1.23164	1.04414	1.36191	1.12854	1.41133	1.33468	0.653827	1.05701		0.122532	0.118508	0.454883	1.19782
5.5	0.0904191	0.112324	0.0977966		0.913515	1.48219	0.100648	0.187068	0.692063	1.24438	1.4819	1.28774	1.53571	1.57308	0.880104	1.07104	0.505008	0.780286	1.05542	0.734075	1.09293	0.555007	1.28274	0.152203	0.295557	0.570113	1.09533	0.291897	0.155667	0.838227	0.323502	0.230475	1.41544	1.3216	1.18966	1.39309	1.40684	1.20236	1.53882	1.18338	1.52018	1.44221	0.882155	1.28453		0.173749	0.169853	0.67026	1.3247
6	0.105769	0.117141	0.116269		1.20233	1.5901	0.140315	0.3812	0.864845	1.3721	1.5877	1.50749	1.65936	1.71648	1.1315	1.18622	0.704202	0.983468	1.19925	0.89738	1.30027	0.748241	1.40303	0.184839	0.397028	0.765311	1.28933	0.377034	0.18686	1.06194	0.415407	0.335403	1.55164	1.43349	1.36674	1.48169	1.54703	1.34285	1.66285	1.29082	1.61078	1.58454	1.12776	1.42491		0.252993	0.231363	0.888432	1.43137
6.5	0.117852	0.127153	0.15247		1.42532	1.69275	0.201111	0.478387	1.01273	1.47548	1.69151	1.67358	1.77443	1.83012	1.30885	1.28297	0.871855	1.13422	1.32339	1.03193	1.47272	0.942619	1.53361	0.18543	0.51706	0.988319	1.46599	0.516556	0.240791	1.24752	0.534363	0.428131	1.66317	1.5557	1.42087	1.6227	1.72207	1.37911	1.82202	1.38068	1.75497	1.69177	1.40855	1.58281		0.353799	0.308528	1.07989	1.53178
7	0.126663	0.13643	0.153368		1.59478	1.78174	0.28626	0.607639	1.14845	1.58134	1.77469	1.82022	1.87828	1.93656	1.46382	1.36569	1.01739	1.26597	1.42589	1.15429	1.59856	1.09574	1.64964	0.185852	0.631876	1.16166	1.59039	0.624168	0.307364	1.3883	0.656949	0.563737	1.78206	1.6143	1.47522	1.69424	1.84537	1.4678	1.94652	1.45311	1.81028	1.76405	1.61988	1.74106		0.476813	0.397587	1.24645	1.61099
7.5	0.143804	0.150449	0.154266		1.73235	1.87272	0.405487	0.737421	1.27979	1.66296	1.85472	1.93977	1.96977	2.03403	1.59011	1.45037	1.13075	1.37061	1.5183	1.25433	1.71737	1.24938	1.73965	0.281176	0.769138	1.30899	1.64473	0.758978	0.37424	1.52525	0.779957	0.664862	1.88848	1.70019	1.52963	1.76586	1.98619	1.53918	1.98352	1.50791	1.90135	1.81877	1.83144	1.82987		0.610073	0.487967	1.37884	1.7002
8	0.158144	0.173295	0.19044		1.85964	1.94701	0.540562	0.899076	1.40307	1.74795	1.92784	2.06335	2.05874	2.12255	1.70127	1.52639	1.22987	1.46853	1.60138	1.36104	1.82212	1.37156	1.82067	0.281627	0.897574	1.43853	1.78651	0.871427	0.454336	1.62707	0.889841	0.800866	1.96413	1.79044	1.6542	1.88954	2.05718	1.64507	2.14286	1.5801	2.00997	1.96136	2.00781	1.97059		0.741831	0.586878	1.49587	1.78023
8.5	0.163605	0.191603	0.190746		1.97019	2.02476	0.68478	1.06109	1.50865	1.82675	1.99732	2.16451	2.14468	2.19902	1.80177	1.59371	1.31714	1.55588	1.6853	1.43977	1.91804	1.49815	1.91044	0.37689	1.00394	1.57687	1.89247	0.970414	0.521128	1.72441	1.00841	0.932468	2.04838	1.84934	1.69	1.96005	2.19692	1.69794	2.19616	1.63384	2.09994	2.06789	2.16593	2.07571		0.871213	0.681543	1.59068	1.85177
9	0.18701	0.218642	0.191257		2.06249	2.09802	0.822002	1.09386	1.61491	1.90175	2.05783	2.24888	2.22542	2.27553	1.9036	1.6509	1.38861	1.63884	1.75273	1.51726	2.00687	1.59301	2.00875	0.440376	1.13208	1.67942	1.94619	1.06473	0.592174	1.81705	1.11365	1.05513	2.1454	1.92573	1.77907	2.03103	2.2502	1.73383	2.33767	1.688	2.20826	2.15725	2.30707	2.23358		0.98795	0.77751	1.68365	1.93143
9.5	0.200726	0.228054	0.209622		2.16574	2.16916	0.948891	1.35297	1.71529	1.98043	2.11946	2.33632	2.31188	2.34669	1.9784	1.71557	1.46441	1.71091	1.82446	1.60294	2.09685	1.69726	2.08529	0.567439	1.25179	1.7824	2.05287	1.15487	0.663463	1.9101	1.21049	1.1563	2.22537	2.00701	1.81549	2.17219	2.35594	1.85711	2.39175	1.77786	2.28111	2.22924	2.48356	2.3395		1.10271	0.875282	1.76402	2.00969
10	0.21637	0.255012	0.191972		2.25138	2.24809	1.06811	1.41794	1.82403	2.05466	2.17919	2.42508	2.38919	2.42175	2.05963	1.7828	1.5263	1.7811	1.89177	1.67136	2.16677	1.79202	2.17458	0.504618	1.36225	1.89371	2.10581	1.23122	0.743304	1.98947	1.29819	1.25707	2.31347	2.07434	1.85096	2.13745	2.49538	1.85733	2.47975	1.81354	2.3171	2.28245	2.55384	2.4443		1.2086	0.966175	1.84566	2.08114
10.5	0.235048	0.264134	0.227792		2.3281	2.32142	1.16912	1.45067	1.93051	2.12916	2.23983	2.4901	2.48376	2.47827	2.13409	1.84591	1.59233	1.84843	1.95046	1.75163	2.24213	1.88681	2.255	0.725972	1.47273	1.99618	2.22949	1.3434	0.801044	2.09519	1.40777	1.3666	2.39722	2.13723	1.90446	2.22556	2.5135	1.92773	2.63849	1.84963	2.37144	2.3538	2.67718	2.47988		1.30154	1.05243	1.92384	2.1665
11	0.249793	0.282078	0.24597		2.40265	2.41072	1.2565	1.516	2.04706	2.21755	2.29385	2.56331	2.59579	2.54299	2.209	1.92091	1.65821	1.91622	2.00961	1.82852	2.31017	1.96344	2.3619	0.726557	1.56985	2.09403	2.38861	1.40174	0.876375	2.14806	1.49098	1.46289	2.4939	2.24455	1.95818	2.33142	2.63632	1.99838	2.69219	1.97466	2.46181	2.47842	2.80082	2.55059		1.38735	1.13603	1.99559	2.25913
11.5	0.267192	0.317973	0.281599		2.465	2.51189	1.33504	1.58006	2.17469	2.31961	2.35964	2.63547	2.70414	2.60858	2.27515	2.0031	1.71285	1.97279	2.07404	1.9229	2.37712	2.06726	2.46014	0.884112	1.66275	2.20541	2.44158	1.46023	0.951841	2.23187	1.58311	1.56809	2.58206	2.33425	2.04659	2.43661	2.7062	2.08582	2.78025	1.99262	2.49782	2.54935	2.95875	2.62058		1.45233	1.20972	2.06255	2.36564
12	0.28212	0.331461	0.29947		2.52301	2.62432	1.4073	1.613	2.32305	2.43727	2.43916	2.70009	2.83241	2.66536	2.34344	2.1071	1.76956	2.02702	2.1444	2.02453	2.45402	2.1619	2.58041	0.916206	1.78193	2.30329	2.47698	1.54993	1.00949	2.29793	1.67072	1.64693	2.68315	2.41036	2.08209	2.45434	2.7935	2.13839	2.90345	2.04607	2.60539	2.63795	3.0291	2.69057		1.52257	1.28484	2.1397	2.48607
12.5	0.30667	0.367153	0.264157		2.58889	2.75684	1.47123	1.67857	2.474	2.55752	2.52577	2.7589	2.96792	2.7338	2.42327	2.21875	1.8339	2.09457	2.21986	2.14349	2.53548	2.26084	2.70489	0.885377	1.90092	2.40094	2.58297	1.64394	1.09357	2.39452	1.77564	1.74307	2.74892	2.53535	2.18837	2.52481	2.88108	2.20864	3.00937	2.1175	2.71324	2.69147	3.11726	2.86546		1.58137	1.35556	2.20564	2.61461
13	0.329566	0.385216	0.28203		2.64532	2.87931	1.52812	1.84001	2.64393	2.69993	2.64111	2.82516	3.10631	2.81812	2.50289	2.34107	1.88867	2.15312	2.32187	2.27897	2.63029	2.3962	2.82987	1.01178	2.01151	2.49463	2.61838	1.74278	1.15138	2.47398	1.89843	1.84396	2.85468	2.64743	2.22388	2.66502	3.00323	2.24377	3.09747	2.15322	2.76717	2.83312	3.22268	2.9878		1.64526	1.42001	2.28636	2.74036
13.5	0.347069	0.425373	0.317892		2.71121	3.00539	1.58563	1.90477	2.82182	2.83752	2.75863	2.88917	3.24185	2.89499	2.60067	2.47182	1.96696	2.23589	2.42472	2.42552	2.73705	2.51314	3.02107	1.01191	2.12611	2.64557	2.75984	1.84576	1.24874	2.6057	1.98588	1.96196	2.97746	2.76797	2.31279	2.77078	3.07371	2.33174	3.274	2.24266	2.9111	2.88694	3.25859	3.00607		1.69264	1.48572	2.37166	2.86831
14	0.365024	0.469992	0.353206		2.78055	3.13354	1.63255	1.93762	2.98516	2.96182	2.87891	2.95916	3.37292	2.9908	2.71915	2.60345	2.04743	2.31511	2.54177	2.57038	2.86343	2.65707	3.14112	1.07553	2.24512	2.80095	2.9	1.94875	1.32841	2.68035	2.10831	2.06249	3.07833	2.92423	2.38291	2.78776	3.17765	2.4185	3.4315	2.31319	2.98214	3.0278	3.34563	3.24968		1.74478	1.55678	2.46965	2.98646
14.5	0.386826	0.487725	0.371312		2.84793	3.23451	1.68011	2.0347	3.13953	3.08356	3.00306	3.04147	3.48368	3.08791	2.84275	2.71981	2.14184	2.40764	2.65947	2.71396	2.99241	2.80526	3.27424	1.1705	2.39474	2.95606	3.0591	2.03811	1.40349	2.83378	2.24802	2.15843	3.18768	3.03559	2.4895	2.92855	3.33525	2.5065	3.53782	2.40266	3.12612	3.15238	3.52179	3.33776		1.79182	1.62343	2.57575	3.09776
15	0.40414	0.514728	0.371312		2.92905	3.33484	1.71996	2.1637	3.26636	3.19312	3.1182	3.13156	3.58853	3.18954	2.97788	2.83363	2.2483	2.5046	2.77844	2.84857	3.12851	2.98117	3.40819	1.23357	2.53626	3.1253	3.14704	2.19073	1.50117	2.98795	2.38836	2.30309	3.28911	3.17452	2.4895	2.98105	3.45717	2.57631	3.74865	2.47366	3.19771	3.15238	3.5919	3.44242		1.83951	1.68694	2.67811	3.18482
15.5	0.422736	0.536921	0.442628		3.01801	3.41251	1.75788	2.26079	3.38423	3.28795	3.20889	3.22683	3.67242	3.286	3.11814	2.92774	2.36108	2.61677	2.88214	2.97548	3.26786	3.18782	3.54574	1.29693	2.67706	3.36475	3.35869	2.32038	1.58952	3.15016	2.54555	2.42088	3.36337	3.30819	2.61353	3.10411	3.54486	2.68156	3.87229	2.58068	3.41306	3.34743	3.66263	3.58259		1.89482	1.74479	2.78297	3.2812
16	0.44059	0.571655	0.424623		3.11129	3.47823	1.79306	2.2935	3.48643	3.37417	3.29483	3.32377	3.75272	3.37182	3.24468	3.0057	2.46226	2.7002	2.97668	3.08483	3.38684	3.33404	3.65451	1.39208	2.82047	3.49113	3.44605	2.45748	1.71207	3.30606	2.70543	2.57636	3.44434	3.42647	2.64834	3.13855	3.6836	2.66357	3.9946	2.61568	3.43036	3.43523	3.74964	3.7564		1.94233	1.81566	2.88758	3.34808
16.5	0.454055	0.599266	0.442628		3.21006	3.54037	1.82198	2.51962	3.57098	3.45362	3.36686	3.41385	3.8248	3.45339	3.36763	3.07946	2.56427	2.78259	3.06511	3.18482	3.5022	3.49789	3.74997	1.39208	2.97211	3.67077	3.60496	2.60672	1.82834	3.43528	2.85137	2.72221	3.51656	3.54006	2.70179	3.22663	3.77132	2.73392	4.08313	2.6872	3.52045	3.48887	3.85545	3.80937		1.9881	1.87288	2.97433	3.42207
17	0.47265	0.630621	0.513474		3.30752	3.58502	1.85669	2.6163	3.63824	3.51833	3.43376	3.4994	3.87067	3.52524	3.48354	3.14241	2.65867	2.85229	3.13445	3.26622	3.60589	3.66459	3.8392	1.51837	3.11342	3.83089	3.70988	2.71888	1.94801	3.59362	2.99591	2.88416	3.58264	3.61625	2.73659	3.31355	3.92745	2.76828	4.20543	2.77544	3.60932	3.54129	3.95997	4.0006		2.03261	1.92821	3.05796	3.47617
17.5	0.485475	0.612406	0.512745		3.40433	3.61868	1.88882	2.64906	3.69716	3.57791	3.48586	3.57069	3.92375	3.58673	3.57128	3.19518	2.73154	2.92073	3.20633	3.3412	3.69208	3.76264	3.91385	1.55031	3.21836	3.95422	3.8838	2.8525	2.05365	3.70251	3.13504	3.01013	3.62557	3.71803	2.71743	3.34676	4.01257	2.76666	4.29113	2.75611	3.71481	3.62781	3.9755	4.10321		2.07965	1.97788	3.12724	3.5172
18	0.496375	0.625666	0.56666		3.4861	3.65427	1.9171	2.81058	3.74264	3.62084	3.53603	3.63614	3.96045	3.63205	3.65453	3.2346	2.79553	2.9727	3.26295	3.40978	3.7731	3.91972	4.00689	1.55031	3.35909	4.09149	3.97337	2.96865	2.19062	3.80318	3.27903	3.14533	3.66034	3.78468	2.78928	3.40075	4.11871	2.83782	4.39832	2.84618	3.78797	3.70008	4.1349	4.2619		2.1267	2.01938	3.18528	3.56259
18.5	0.507812	0.656641	0.566161		3.55383	3.6941	1.94263	2.94004	3.77373	3.65899	3.57305	3.69611	3.99224	3.67901	3.73556	3.28457	2.85296	3.02061	3.31039	3.46783	3.8389	4.01802	4.08181	1.64533	3.45985	4.20177	4.1303	3.12929	2.34949	3.92987	3.38775	3.27586	3.69918	3.86887	2.8059	3.41704	4.16961	2.83672	4.48468	2.84511	3.89403	3.75183	4.20362	4.33024		2.17355	2.05942	3.23619	3.60023
19	0.519889	0.65193	0.583674		3.62025	3.70738	1.96944	3.00441	3.8189	3.68624	3.60493	3.74182	4.02336	3.7169	3.79226	3.30783	2.90341	3.06029	3.35593	3.51882	3.90339	4.11629	4.14783	1.70839	3.55178	4.30758	4.18236	3.17801	2.44197	4.00386	3.48771	3.35831	3.72048	3.93072	2.84067	3.39894	4.25598	2.88851	4.50151	2.82683	3.85761	3.71585	4.23796	4.48646		2.20069	2.09443	3.27836	3.61859
19.5	0.525982	0.661227	0.583926		3.66906	3.71552	2.00037	3.19849	3.84297	3.7161	3.63239	3.78886	4.0368	3.73995	3.84066	3.33311	2.9483	3.09375	3.38946	3.55514	3.95365	4.20269	4.17548	1.80341	3.61877	4.39738	4.2358	3.26831	2.5665	4.07063	3.56725	3.46839	3.75648	3.99415	2.85883	3.45203	4.27408	2.92395	4.55493	2.89835	3.94771	3.75183	4.39636	4.50462		2.22552	2.12274	3.30875	3.64071
20	0.535169	0.674482	0.654466		3.71348	3.73619	2.03094	3.19771	3.86279	3.74232	3.65353	3.81474	4.06104	3.77356	3.89824	3.36161	2.98679	3.12593	3.42816	3.59288	4.00611	4.28329	4.22404	1.80287	3.68015	4.46804	4.35746	3.37547	2.67245	4.14493	3.65875	3.57733	3.7474	4.04293	2.85779	3.50329	4.34234	2.88795	4.58856	2.91501	3.98217	3.78588	4.41244	4.6252		2.25452	2.15395	3.3305	3.65933
20.5	0.548951	0.674229	0.672751		3.75573	3.73721	2.0548	3.32718	3.88236	3.76705	3.66747	3.83649	4.0712	3.78236	3.93382	3.38243	3.01014	3.15305	3.44515	3.62021	4.03497	4.3096	4.2856	1.89789	3.71038	4.5472	4.41163	3.45101	2.76047	4.1794	3.72808	3.62479	3.76431	4.07798	2.84119	3.52201	4.37856	2.92395	4.69544	2.98708	4.00138	3.78717	4.51901	4.71388		2.2749	2.1722	3.36587	3.67647
21	0.552904	0.683149	0.743404		3.78939	3.74528	2.07747	3.39151	3.89868	3.78015	3.68833	3.86207	4.08594	3.80531	3.96806	3.40112	3.03635	3.16724	3.46641	3.64933	4.06768	4.37254	4.29893	1.92931	3.77646	4.59157	4.48088	3.50919	2.85336	4.23645	3.78052	3.70343	3.76431	4.09137	2.89333	3.50359	4.37751	2.958	4.72942	2.98625	4.05405	3.82154	4.58799	4.71274		2.29162	2.1856	3.38861	3.68174
21.5	0.561129	0.687227	0.743404		3.82962	3.7508	2.10684	3.39178	3.9163	3.79587	3.70862	3.88638	4.09609	3.82442	4.0068	3.41865	3.06271	3.19422	3.48903	3.67019	4.10559	4.41198	4.3468	1.99273	3.79314	4.63928	4.53362	3.57995	2.94994	4.29252	3.83205	3.75057	3.76337	4.13056	2.91097	3.55607	4.37751	2.97545	4.67674	2.98625	4.01827	3.87455	4.64054	4.78248		2.3143	2.20488	3.40767	3.70133
22	0.570103	0.686846	0.743269		3.85316	3.74692	2.12996	3.45528	3.92078	3.80803	3.72019	3.90451	4.10395	3.82572	4.02024	3.42247	3.08234	3.2126	3.49984	3.69069	4.12761	4.4514	4.34578	1.96035	3.82302	4.68254	4.60357	3.6149	3.00669	4.31785	3.87919	3.79333	3.76681	4.15634	2.91071	3.57325	4.42938	2.97516	4.72903	2.98597	4.01794	3.89189	4.67521	4.8344		2.32383	2.21117	3.42265	3.70071
22.5	0.563477	0.682515	0.778515		3.87346	3.74889	2.15463	3.52071	3.93873	3.82216	3.73633	3.92592	4.12098	3.83417	4.0497	3.43973	3.10021	3.22412	3.52408	3.70613	4.15353	4.51467	4.3861	2.11898	3.84095	4.69622	4.65556	3.6286	3.07769	4.33573	3.92319	3.84167	3.78903	4.19682	2.87491	3.57263	4.44608	2.99204	4.78094	2.98542	4.07093	3.8559	4.72701	4.83363		2.33867	2.23024	3.44081	3.71814
23	0.569136	0.70022	0.689723		3.88361	3.74922	2.16472	3.55273	3.93714	3.81994	3.73862	3.93273	4.10951	3.82998	4.06411	3.44264	3.10947	3.23779	3.53016	3.71608	4.16487	4.50982	4.39465	2.15039	3.87587	4.74021	4.74345	3.68201	3.15261	4.37488	3.94472	3.87193	3.79748	4.19203	2.92782	3.48519	4.46348	3.0618	4.83361	2.96768	4.01727	3.87357	4.76204	4.90336		2.348	2.23003	3.45051	3.71163
23.5	0.574795	0.695379	0.742592		3.90226	3.73339	2.18058	3.61733	3.93299	3.8286	3.74283	3.9363	4.11245	3.83938	4.0798	3.45444	3.11492	3.2502	3.53941	3.73116	4.18527	4.55372	4.43359	2.05556	3.90573	4.79231	4.72474	3.7214	3.20489	4.40897	3.95689	3.91466	3.81406	4.16874	2.89176	3.5717	4.44501	2.99119	4.72712	3.0378	4.03416	3.90791	4.83095	4.93705		2.35923	2.23485	3.45459	3.71319
24	0.576077	0.708623	0.831791		3.91468	3.72951	2.18829	3.55245	3.94644	3.82924	3.74026	3.96091	4.12359	3.84779	4.08876	3.45762	3.12885	3.25717	3.54577	3.73052	4.20341	4.5938	4.41992	2.15019	3.8966	4.79637	4.81375	3.75242	3.22232	4.43495	3.99152	3.91871	3.81374	4.19517	2.94546	3.57263	4.48089	3.04436	4.81605	3.00316	4.1067	3.89124	4.86713	4.99052		2.36177	2.2493	3.46146	3.71816
24.5	0.581735	0.704294	0.83165		3.92744	3.71174	2.2003	3.5533	3.94869	3.84239	3.73933	3.95671	4.12195	3.84943	4.10316	3.45989	3.13493	3.26134	3.55821	3.74112	4.21603	4.58966	4.43803	2.11918	3.91013	4.80562	4.81337	3.76613	3.26679	4.47476	4.01804	3.93649	3.80968	4.1955	2.9452	3.5898	4.53275	3.02663	4.79811	3.02062	4.08847	3.9439	4.86674	5.04241		2.36792	2.25286	3.46617	3.73526
25	0.583438	0.699198	0.79572		3.94185	3.70919	2.20761	3.74564	3.94103	3.83986	3.72976	3.96968	4.12391	3.85205	4.11277	3.45172	3.14583	3.26208	3.55256	3.74181	4.2115	4.62384	4.40967	2.11818	3.93053	4.85251	4.81223	3.78255	3.33176	4.48183	4.04266	3.96547	3.79934	4.20277	2.90914	3.57139	4.47946	3.02578	4.84961	3.01979	4.06958	3.92524	4.8831	5.02379		2.36814	2.2581	3.47496	3.75952
CHD-F
	H2O control				Males																																									Female
Time (min)	1	2	3		1	2	3	4	5	6	7	8	9	10	11	12	13	14	15	16	17	18	19	20	21	22	23	24	25	26	27	28	29	30	31	32	33	34	35	36	37	38	39	40		1	2	3	4
0.5	0.00210794	0.000613322	0.00822135		-0.00404139	0.00296481	-0.000595071	-0.00171008	0.00585257	-0.00115266	0.000120378	0.000934019	0.000852488	-0.00234229	0.0026825	-0.00160782	0.00159455	0.00405427	0.00397067	0.00520855	-0.00284904	0.00209446	0.00219163	0.0360919	0.00468931	0.00125301	0.00451301	0.0105087	-0.00585437	-0.0030553	0.000566975	-0.0210446	0.00113227	0.00258304	0.0114106	0.00590648	-0.00572713	0.000619008	0.0277476	0.00611046	0.00738105	0.0233962	0.00621756	-0.00533876		0.00031074	0.0060172	-0.00328482	-0.000280097
1	-0.00108785	-0.000543343	0.00675855		-0.0015394	-0.000137908	-0.00174462	0.020706	-0.00482341	-0.000633483	0.00259302	0.00513217	-0.00447838	0.00210376	-0.00231968	-0.00265162	0.0023285	-0.00461182	0.00451638	0.000101666	-0.000514942	-0.00340742	-0.00331826	-0.011897	0.00333983	-0.00453119	0.00299391	0.0181836	0.00194208	-0.00414321	0.0126064	-0.0090919	-0.000195432	-0.0119034	-0.00935333	-0.0148832	0.0220318	-0.000896454	0.00679361	-0.005034	0.00621558	0.00250982	-0.0146918	-0.00679524		0.00111284	-0.000822328	0.00661248	0.00402429
1.5	-0.00417155	0.011602	-0.00448589		0.00104541	-0.00313608	0.00280377	-0.0273328	0.00144311	-1.67482e-05	-0.00419876	-0.00183672	0.00164053	-0.00652963	0.000269242	0.00011151	-0.000576	0.00172441	0.00143302	-0.00114493	0.00191413	-2.80264e-06	-0.00438785	-0.0128832	0.00199628	-0.0058881	0.00141558	-0.00522669	0.000883604	-0.000834182	-0.00169542	0.00280832	-0.0015173	0.00456128	-0.000825735	0.0225919	-0.00844401	0.0168616	0.0149233	0.00325452	0.00500466	0.0109378	0.0129935	0.0110566		-0.00174509	-0.0019644	-0.00380641	-0.000835831
2	0.00401794	-0.00274611	-0.00603977		0.00366626	0.00328	-8.60648e-05	0.0422068	0.000281499	-0.00121509	0.000278677	0.000636616	0.00214645	0.00366122	0.00475741	-0.000815935	0.000284361	0.00251162	-0.00344623	0.00139186	0.00438545	-0.00539014	0.00785748	0.00924708	0.000769875	0.0104454	-0.00988857	-0.00187848	0.00431885	0.00693492	0.00164687	0.0147633	0.00602266	0.00344385	0.0173408	0.00174133	0.00942788	0.0151846	-0.00604086	-0.00795481	-0.0158529	-0.000203488	0.00172839	-0.000217265		0.00103992	0.000651782	-0.00305089	-9.79665e-05
2.5	-0.00083148	-0.0125287	0.0121552		-0.00493571	0.000376932	0.00266253	-0.029088	0.0010313	-0.000500286	0.0029224	-0.00245079	0.000830326	-0.00110887	-0.00375328	0.000153625	0.00118249	0.00148873	-0.00454837	0.000247195	-0.000577804	0.0070255	-0.00184917	-0.0148908	-0.00471385	0.00490666	-0.00146009	-0.00728243	-0.00974447	-0.00273507	-0.00365877	-0.00374955	-0.00381665	-0.0019637	-0.00309396	-0.00901499	-0.0109664	-0.0149673	0.00240133	0.000603048	-0.00698554	-0.00124907	0.0199019	-0.00142185		-0.00358653	0.0051523	-0.000409971	0.000682785
3	0.00207295	0.00421615	-0.00838812		0.00176345	-0.000382948	-0.00363561	-0.00649202	0.0020675	0.00236561	-0.00159534	-0.00148128	-0.000138935	0.00187353	0.00104631	0.00320242	-0.00321935	-0.00111294	0.00204519	-0.000595794	-0.00520684	0.00177487	0.00169781	0.0304238	-0.00139214	-0.00493279	0.00693917	-0.00379598	0.00259993	0.000777546	-0.00889906	-0.00473019	-0.000493285	0.00586194	-0.00406781	-0.000434946	-0.0120493	-0.0161824	-0.0180774	0.00913125	0.0116182	-0.0119951	-0.019932	-0.00262227		0.00317885	-0.00301736	0.00065479	-0.00377328
3.5	0.00672985	0.00335087	0.000220472		0.00460532	0.00249307	0.00113416	0.0162004	0.00670828	-0.000434367	0.0457603	0.00310311	-0.00308969	0.00289305	0.00202878	-0.00123025	-0.00215288	-0.00379413	0.00297642	0.00217338	0.00125427	0.000994567	-0.0078756	0.00652838	-0.0111016	-0.0059425	-0.00379581	-0.0178886	-0.0069466	0.00432357	-0.00537598	-0.00565609	-0.00147708	-0.00381134	-0.0146165	-0.0110384	0.00619593	-0.036458	9.79766e-05	0.00810109	0.00100642	-0.0129093	-0.0113037	-0.013305		0.00242839	0.00534452	-0.00204965	0.000861936
4	0.00419144	0.00707473	-0.0105979		0.00207206	0.00372539	0.00239532	-0.00793747	0.00232882	-0.00297817	0.0413426	0.00236094	-0.00388056	0.0022702	0.00509054	8.01946e-05	-0.00641336	0.00480826	0.00414623	-0.00407658	-0.00134466	-0.00401425	-0.0128673	0.00566038	-0.0075075	-0.0110903	-0.0146249	0.0122347	-0.00317444	0.0123965	0.00266607	-0.0107152	0.00210507	-0.000131964	-0.00590378	-0.0313371	0.00508693	-0.00889356	-0.00111162	0.0165886	0.00980051	-0.00425543	-0.0124502	-0.0144811		0.00372842	0.00470276	-0.00268442	-0.0107684
4.5	0.00161125	0.00191503	0.00792227		-0.00236733	0.00490967	0.00361092	-0.00861459	0.00530203	-0.00186977	0.0498402	0.00528139	-0.00659175	-0.000254658	-0.0011517	-0.000494811	0.000339642	0.00230161	0.00342138	0.00258587	0.00158582	-0.00469758	-0.000442052	-0.0181254	0.00900746	0.00109873	0.0133891	0.0158231	0.000501032	-0.0100862	0.00625446	-0.0201969	0.0012292	-0.000931428	-0.00651311	-0.0031625	-0.0339257	-0.0192333	0.0268927	-0.00339382	-0.000527316	0.00475448	-0.0227877	-0.0248069		0.00128792	0.00401697	-0.00519511	-0.00412532
5	0.00658873	-0.00304085	-0.0217996		-0.00292855	0.0025169	0.00679897	0.0374779	0.00841299	0.00122934	0.0399845	0.00278967	-0.00167208	0.00664527	0.00384565	0.00641307	-0.00566978	0.00177186	-0.00452226	0.00199151	-0.000902012	-0.00520877	-0.0140772	0.0043637	-0.000346707	-0.00393206	-0.00669406	-0.0111068	0.00434117	-0.0106154	-0.0159781	-0.0121349	-0.00376013	-0.00152951	-0.00722233	-0.013549	-0.00599085	-0.0105612	-0.00276011	0.0053895	0.00849509	-0.00566621	-0.00440954	-0.0160838		0.00266459	0.00346967	-0.00207366	-0.00101596
5.5	-0.00139271	0.00515096	-0.0128542		-0.00162705	0.00753887	-0.00109789	-0.0327977	0.0023005	-0.00673884	0.0467694	0.000303329	-0.00421113	-0.00131185	0.00514025	0.00410751	0.00486233	-0.00242949	0.00410498	-0.00229219	0.000324253	-0.00133111	-0.00150501	0.0268081	0.00333069	-0.000254072	-0.00739894	-0.00730043	-0.0136134	0.0018745	-0.00353284	-0.0170665	-0.00873864	-0.0152045	-0.00777831	-0.0141596	-0.0161756	-0.0112644	0.00611184	-0.00487278	0.00794465	-0.00626108	0.00451576	-0.0167596		0.00219344	0.00842893	0.00104109	0.00391155
6	0.0072727	0.00890254	-0.00404954		-0.000328364	0.0069988	0.00208842	-0.010005	0.00724929	0.0018831	0.0461612	0.00337465	-0.00302471	0.00742761	0.00458811	0.00364465	-0.00113897	0.000715792	-0.00198494	0.00449321	-0.00215684	-0.0062702	-0.0107946	-0.0425841	-0.00605144	-0.000984393	-0.00823017	-0.0648346	-0.00545658	-0.00304572	0.00451452	-0.0133963	-0.000786565	-0.00712564	0.0108058	0.0138443	0.0117324	-0.0120936	0.0052809	0.00395233	0.0169867	0.0122949	0.00371629	-0.0175566		0.00356618	0.00787804	-0.00133032	-0.00393164
6.5	0.00494161	-0.000366154	0.00492116		-0.00451211	0.00470087	0.00535261	0.0125664	0.0067659	-0.00229149	0.0474983	-0.00270016	0.00384683	0.00142626	0.00228661	0.00325969	0.00028485	0.000277109	0.00121069	0.00583934	-0.000827401	-0.0111139	-0.00256337	0.0255139	0.00633389	0.007078	0.000682235	-0.0128315	0.00276816	-0.00353621	0.00399948	-0.00100157	-0.00138325	-0.00331597	0.000673958	-0.0154325	-0.00792726	-0.0127302	-0.00490417	-0.0158105	-0.00288521	-0.0171211	-0.00647121	-0.027712		0.00501471	0.0147458	4.29463e-05	0.00290094
7	0.00271076	-0.000744431	0.00398864		0.000686171	0.000648675	-0.000510541	0.0586788	0.00637981	-0.00819953	0.0507762	0.00242591	-0.000321314	0.00847473	0.0056031	0.00295222	0.0017884	-0.00190469	-0.00284062	0.00176164	-0.00494372	-0.00269859	-0.0116159	0.00231165	0.00156597	-0.00638508	-0.000285635	-0.00447342	-0.0062694	-0.00389232	0.00362555	-0.0143513	-0.00613335	-0.00805822	0.00950591	0.00284655	-0.00877779	-0.0231977	-0.0058459	0.00246188	-0.00361787	-0.00830701	-0.0169376	-0.019084		0.00469976	0.0125445	-0.000319035	0.00253444
7.5	0.0115436	-0.00112216	0.00374039		0.00216667	0.0132169	-0.000845124	-0.0112618	0.00783135	0.000597949	0.0540494	0.000158782	0.00293926	0.00811726	0.00707517	-0.00285507	-0.00220091	-0.000423146	0.000446037	0.00320676	0.000185923	0.00133273	-0.0032664	0.00188417	0.00112639	0.00183751	-0.0100774	0.0126061	-0.0066108	-0.00424791	0.00756522	-0.0104426	0.00637852	-0.00844994	-0.00989101	-0.01648	-0.00900421	-0.0234479	-0.0156274	0.0117906	0.00585298	-0.0181251	0.00193959	-0.00980031		0.00622385	0.0176617	-0.000680497	0.0148987
8	0.00935983	-0.00154646	-0.0063785		-0.00186988	0.00920942	0.000701438	-0.0117209	0.00932922	0.00208894	0.0463346	0.00163763	0.00254301	0.00226155	0.00675283	0.00604146	-0.000656909	0.00110008	0.00194405	0.0010236	0.0016672	-0.00342187	-0.00800469	0.0470891	0.00495056	0.00133184	-0.0106488	0.0121567	0.00168179	-0.00464734	0.00283273	-0.00228401	-0.00704524	-0.000209561	0.00883229	-0.00743295	-0.00951305	-0.0145064	-0.00666001	-0.00786924	0.00540682	0.0197837	-0.0177092	-0.0198755		0.00411046	0.0100246	0.00264579	0.0218407
8.5	-0.00207428	-0.00187599	-0.0164209		-0.00409487	0.00147514	0.000366436	-0.011846	0.00894209	-0.000140762	0.0496066	0.00674996	0.000237615	0.00375544	0.0118965	0.00390167	-0.000983567	0.00440513	-0.00209938	0.000630786	0.00124862	-0.0124503	-0.00830839	-0.0216365	-0.00838135	-0.0033879	0.0078833	0.00744721	-0.00729214	-0.000640142	-0.00610675	-0.00264206	-0.0117275	-0.00489421	-0.0203217	-0.00787908	-0.000458494	0.0039813	-0.00716006	-0.0178887	0.00501084	-0.00943166	-0.00864042	-0.0203617		0.00196074	0.0151368	0.00228268	0.0341745
9	0.00500045	0.00219646	0.00219288		-0.00437277	0.0085799	0.00378863	0.0108569	0.0123193	0.00139798	0.0493023	0.00458975	0.00175202	0.00718136	0.00794559	0.0055013	0.000598546	0.00414081	0.00310494	0.00951424	0.00277963	0.00911641	-0.00422976	-0.0220889	-7.92208e-05	0.00492757	-0.00214945	0.015867	-0.00754714	0.00772219	0.00653262	-0.0115511	-0.00774069	-0.000854011	-0.00156779	-0.00832456	-0.0199151	-0.0344974	-0.00765939	0.00074135	0.00461543	-0.000276983	0.00995134	-0.0208471		0.00539699	0.0185097	0.0020107	0.0556658
9.5	0.0120189	0.00186495	-0.00759788		-0.0028461	0.00826574	0.00349391	0.0106386	0.0119791	-0.000779372	0.0544546	0.00422122	-0.00234479	0.00318151	0.0131284	0.00523173	-0.00333902	0.00200727	0.00277005	0.0054968	-0.0012737	-0.00426995	-0.000199566	0.000511427	0.00384837	-0.00411088	-0.00240577	0.0111606	0.000816206	0.00740455	0.00190311	-0.0119029	0.00049059	0.00746431	-0.0113405	-0.00854706	-0.0106409	0.0032034	-0.0174148	0.000504739	0.0140587	-0.000493856	0.00970468	-0.011587		0.00145416	0.0181836	0.00532899	0.0843377
10	0.00988879	0.00597827	-0.0176214		0.00612318	0.0153586	0.00507602	-0.0358948	0.00619339	0.00442104	0.048644	0.00758735	0.0010193	0.00476041	0.0165177	0.00682878	0.00189184	0.00356908	0.00248334	0.00886713	0.00394171	-0.00884007	-0.00908759	0.000133999	-0.00504307	-0.0043885	-0.00291785	0.0152656	-0.00372802	0.0071779	-0.0112285	-0.0164506	-0.00408059	-0.00577799	-0.00217611	0.000526431	-0.0300692	0.00268574	-0.00840703	0.00956681	0.0136572	-0.0200705	-0.00983948	-0.0310697		0.0103856	0.021551	0.00868902	0.125721
10.5	0.00964628	0.0187838	-0.00832741		0.00034139	0.0151314	0.00669874	0.0101155	0.00778402	0.00783511	0.0557266	0.00916304	0.00628558	0.0100669	0.0144506	0.0121169	-0.00196074	0.00334955	0.0077245	0.0141164	0.00920434	-0.00469284	-0.00930359	0.0455487	0.00760507	-0.000347796	-0.00317362	0.00631245	-0.00394179	0.00695146	0.00143955	-0.0124047	0.00424836	0.011291	-0.00237859	-0.00921361	-0.00182993	-0.00704921	-0.00865589	-0.028798	0.0134567	-0.00114354	-0.000556513	-0.021816		0.0101872	0.0231394	0.00664401	0.174369
11	0.0150103	0.0228366	0.00102142		0.00204965	0.0168343	0.00473869	0.0328803	0.022281	0.009516	0.0537398	0.0108436	0.00796408	0.00809093	0.0198092	0.00834667	0.00338749	0.00686438	0.00392767	0.00480544	0.00352251	-0.000591913	-0.00956253	0.0679778	0.0115775	0.00363311	-0.00336532	0.0190645	0.00445002	0.0109862	-0.00313386	0.00875651	0.0125147	-0.00631667	0.00702651	0.000132019	0.00748222	0.0117072	-0.0183356	-0.00038104	0.0133064	0.036957	-0.0102581	-0.0030178		0.0100682	0.0284645	0.00832247	0.246657
11.5	0.0166014	0.0183449	0.000652314		0.00181586	0.0184449	0.00819276	-0.036564	0.0202046	0.00743708	0.0589825	0.010578	0.0132235	0.00970983	0.0140783	0.00997889	-0.000462974	0.00846594	0.00733912	0.011884	0.00326081	0.00363343	0.00329368	0.0221088	0.0114106	0.00777925	-0.0227313	-0.0115222	0.00431966	0.00654439	0.00961206	1.80836e-05	0.0080541	0.00651154	-0.0123854	-0.000205655	-0.0118207	-0.00762263	0.000272994	-0.0102583	0.00338343	-0.00162989	0.0274417	-0.0413291		0.00987006	0.0318699	0.0135373	0.32238
12	0.020174	0.0268357	-0.0185786		0.0109576	0.0220294	0.0136038	-0.0366426	0.0219351	0.00367945	0.0570475	0.0123102	0.0149564	0.0133023	0.0231433	0.00807582	-0.000544425	0.0138436	0.0035929	0.00629139	0.00499609	0.00346163	-0.0055373	0.0220107	0.0197909	0.00755325	-0.0229176	-0.0334444	0.00846725	0.0106672	0.00942408	0.004103	0.00354161	0.00631137	-0.0125343	-0.00987873	0.00696208	-0.0267459	-0.0188869	-0.0199535	-0.016004	-0.00179183	-0.00128361	-0.0130586		0.0171129	0.0317745	0.0188875	0.418196
12.5	0.0218112	0.0222966	-0.0186981		0.00707471	0.0273575	0.0134323	0.0784729	0.0235661	0.00348203	0.0623372	0.0212859	0.0165735	0.0168031	0.0229541	0.0115707	0.00475749	0.0118431	0.00887484	0.0170755	0.00846488	-0.00541003	-0.00138569	-0.000901137	0.0109662	0.0116389	-0.0135545	0.00982155	-0.000347406	0.014787	0.00923625	0.00389684	0.00332448	0.00178948	-0.00308612	-0.00998944	-0.0215749	-0.0268697	-0.0190093	-0.0200678	0.00313769	0.0076565	-0.010915	-0.0416223		0.0187818	0.042505	0.0168872	0.531895
13	0.0289494	0.03951	-0.00953981		0.0124231	0.0308451	0.00959955	-0.0139617	0.0288513	0.00694034	0.0657922	0.0137216	0.0255744	0.0184618	0.0227651	0.0132389	0.0100556	0.0134856	0.00868191	0.0132148	0.00641532	0.00316129	0.0114556	0.0215698	0.0150983	-0.00146254	0.00503237	0.0183605	0.00816085	0.0103486	0.00051492	-0.00911865	0.0160346	0.00164071	-0.00338881	-0.0103213	-0.012437	0.00113719	-0.00041869	-0.0108963	0.0124562	0.00732786	-0.0112727	-0.0135478		0.0277663	0.0423106	0.0185142	0.658178
13.5	0.028799	0.0568183	-0.00978177		0.0178159	0.0325411	0.0149626	-0.0140443	0.0268742	0.0122734	0.060145	0.0209079	0.0253993	0.0183258	0.0244531	0.0167689	0.00628984	0.016992	0.0103605	0.0203814	0.00993398	-0.00557846	-0.0102087	-0.00127654	0.0107442	-0.00151817	-0.00470436	0.013967	-0.000519313	0.00170221	0.00904854	0.00797744	0.0159793	0.0145522	0.00594847	0.00844584	-0.00319546	-0.00857628	0.00880555	0.0174046	0.0122565	0.0166567	0.0264962	-0.0137921		0.0313003	0.0512601	0.0219992	0.793531
14	0.0341985	0.0565578	-0.00990268		0.0177197	0.0397907	0.0130468	0.00885589	0.0359092	0.0176541	0.0691924	0.0189638	0.0252826	0.0200739	0.0316763	0.0148668	0.00620728	0.0260019	0.0139095	0.0184514	0.00799049	0.00290414	-0.00177979	0.0213252	0.0147632	0.0111279	-0.0237856	-0.00798869	-0.000734025	0.00577725	0.000238178	0.00771822	0.0157025	0.00566181	0.0439949	0.00833196	0.00615464	0.0102054	0.00867833	0.0267929	0.0217647	0.0260915	0.0358704	-0.00444398		0.0312173	0.0529801	0.0273417	0.943407
14.5	0.0377122	0.0607383	-0.010084		0.0212643	0.0433189	0.0202359	0.0315624	0.0394104	0.012023	0.0726948	0.0261455	0.0343323	0.0291286	0.0297033	0.0202175	0.013362	0.020406	0.0101188	0.0201284	0.0188563	0.0114663	0.00673049	0.0664393	0.018891	0.00665085	-0.00502244	-0.029833	0.00776748	0.00564212	0.0129603	0.0161299	0.0198241	0.0184638	0.00569239	0.0271409	0.015443	0.0289134	-0.0104548	-0.0114173	0.0120071	0.0354658	0.016684	-0.0140972		0.0365766	0.0619228	0.0380693	1.10032
15	0.0431591	0.0735874	0.00874732		0.0285927	0.0542822	0.0220216	0.0314718	0.0393595	0.0229309	0.0708128	0.0334334	0.0379627	0.0401107	0.035142	0.0220004	0.0151395	0.0258187	0.0191817	0.0255623	0.0132913	0.0113355	0.00227744	0.0208854	0.0316045	0.0107876	-0.024157	-0.00827557	0.0076365	0.0183956	0.0128187	0.0159722	0.0325162	0.00104646	0.015071	0.0174779	0.0152678	0.028713	0.00829694	0.0169213	0.00225486	0.0352942	0.00700303	-0.0142802		0.0456734	0.0709629	0.0488898	1.27373
15.5	0.0466692	0.0733732	-0.000881365		0.0266019	0.0578052	0.0200622	0.0313812	0.0483358	0.0246037	0.0761425	0.0369385	0.0451615	0.0418066	0.0331687	0.0255252	0.0113754	0.0275002	0.0190344	0.0217538	0.0204786	-0.00186639	0.0107372	0.0435078	0.0399603	0.0191694	0.0136002	-0.0128041	0.0160868	0.018211	0.01263	0.0157622	0.0408587	0.000848656	0.0340277	0.0363337	0.0246079	0.0285795	-0.00129705	0.0168006	0.0501622	0.044719	0.0258673	-0.0144021		0.0528542	0.0762624	0.0559859	1.4305
16	0.0557246	0.0862655	0.0180019		0.0338778	0.0632102	0.0309458	0.00829337	0.0537088	0.0281524	0.0815226	0.0460016	0.0487292	0.0453863	0.0367285	0.0272667	0.016748	0.0292269	0.0244005	0.0307891	0.0185348	0.0110743	0.0149649	-0.0247416	0.0398443	0.0147512	-0.00546727	-0.0345822	0.0116864	0.0138249	0.0125356	0.0156572	0.0535958	0.0223187	0.0625064	0.0456989	0.0339447	0.0378919	0.0175081	0.0261806	0.0500558	0.0541405	0.0447248	-0.00506223		0.0545944	0.0816111	0.0649393	1.60364
16.5	0.0611669	0.0992091	0.0273774		0.0430445	0.0760001	0.0345578	0.00812055	0.0591325	0.033577	0.0851261	0.0514492	0.0542001	0.0581981	0.0403357	0.034513	0.0203428	0.0309992	0.0279935	0.0289104	0.0239897	0.00668936	0.00628585	0.0204951	0.0440775	0.0276032	-0.0245279	0.0130715	0.00733114	0.0266597	0.00392255	0.0156047	0.0663882	0.030894	0.062394	0.0835074	0.0149176	0.0377568	-0.0015476	0.0165593	0.0499493	0.0635585	0.0445958	-0.0241059		0.0655113	0.0924617	0.0721306	1.76788
17	0.0628923	0.120815	0.0178133		0.0374152	0.0795664	0.0344685	0.0311095	0.0645022	0.0407732	0.0886751	0.0495017	0.0651391	0.0599372	0.0530309	0.0362525	0.022076	0.0327248	0.0333565	0.0324615	0.02021	0.0153283	0.0235075	0.0659107	0.0611828	0.0404529	-0.0245897	-0.0650242	0.0115984	0.0223197	0.0252891	0.0155523	0.0791784	0.026529	0.0528116	0.0739624	0.0432173	0.0565758	0.0173151	0.0449932	0.0786864	0.0825686	0.0445314	-0.00524749		0.0690753	0.0978061	0.0774585	1.91923
17.5	0.0665014	0.120642	0.0176876		0.0502646	0.0831829	0.0362516	0.00807737	0.0717483	0.0425455	0.0904491	0.0586158	0.0724503	0.0635614	0.0493263	0.043496	0.0311233	0.0417677	0.0351269	0.0397167	0.0311702	0.0195366	0.0147389	0.0658578	0.0695826	0.0316722	-0.00578466	-0.000131279	0.0157763	0.0264723	0.0251443	0.0282294	0.0961241	0.0393094	0.0622253	0.0833166	0.0336447	0.065879	0.0266476	0.0353712	0.0593848	0.091979	0.0349151	-0.00537094		0.0763355	0.101386	0.0936968	2.06533
18	0.0682789	0.137907	0.0271863		0.0538988	0.0978	0.0343792	0.00790471	0.0680453	0.0443175	0.0958784	0.0640604	0.0816034	0.0726943	0.0565855	0.0379913	0.029262	0.0471737	0.036897	0.0414909	0.0366221	0.0281712	0.0233237	0.0202514	0.0823901	0.0273126	0.0036796	-0.0305201	0.0157319	0.0393001	0.0250961	0.0281759	0.108907	0.0392565	0.0812742	0.102276	0.0525466	0.0753206	0.0361085	0.0353712	0.0785749	0.120579	0.0444024	0.00408663		0.0835945	0.106782	0.0954534	2.18793
18.5	0.0701099	0.142119	0.0365558		0.0557414	0.0996336	0.0398619	0.0539093	0.0771684	0.053441	0.0995339	0.0658943	0.0797604	0.0800399	0.0584128	0.0434542	0.0347156	0.045356	0.0405382	0.0433174	0.0366221	0.0237425	0.0189177	0.0203001	0.077978	0.0400974	0.0224762	0.0257247	0.00702617	0.0263318	0.0249996	0.0323458	0.113061	0.0348402	0.0811584	0.102145	0.0524233	0.0940587	0.045436	0.0542367	0.0976501	0.129981	0.0537591	0.00396153		0.0963772	0.114047	0.108122	2.31437
19	0.0735556	0.150658	0.0365558		0.0592196	0.103088	0.0433352	0.0538621	0.0787757	0.0514022	0.102969	0.0784958	0.0850353	0.0926873	0.060038	0.0523891	0.0327234	0.0488002	0.0457943	0.0522365	0.0419061	0.0279912	0.0317669	0.0429491	0.0907188	0.0485781	0.0130137	-0.0047063	0.0284781	0.0348182	0.0334622	0.0365142	0.117213	0.0390453	0.0906812	0.121102	0.0524233	0.0751788	0.0643545	0.0637314	0.0784634	0.139512	0.0822161	-0.0149501		0.0980139	0.119275	0.11695	2.43254
19.5	0.0790465	0.150598	0.0364269		0.0647454	0.101255	0.0451621	0.0537676	0.0787757	0.0532263	0.104796	0.0784958	0.0924051	0.094523	0.0618645	0.0560298	0.0363577	0.0524343	0.0403344	0.0485848	0.0400712	0.0236087	0.0274072	0.0428476	0.0863689	0.0528172	0.0128835	-0.00042194	0.0155104	0.0347707	0.0419716	0.0364599	0.108589	0.0519211	0.0715217	0.111491	0.0711952	0.103352	0.0831328	0.0636024	0.0975352	0.148909	0.110532	0.00383648		0.107141	0.119275	0.122378	2.52101
20	0.0863676	0.159133	0.0551526		0.073955	0.106754	0.0506429	0.0308382	0.0915435	0.0641705	0.112104	0.0876622	0.0942476	0.0963588	0.0673442	0.0542095	0.0399921	0.0597025	0.0457943	0.0595401	0.0455758	0.0365298	0.048876	0.0655939	0.107678	0.0526966	-0.0062919	0.0341343	0.0326484	0.0389645	0.0461505	0.0449016	0.129858	0.0604307	0.0998466	0.1207	0.0803863	0.0747538	0.0639439	0.0728343	0.0973056	0.167693	0.100771	0.0130373		0.110792	0.135618	0.127806	2.60768
20.5	0.0862573	0.159011	0.0743398		0.0775321	0.113978	0.0468976	0.0766436	0.089609	0.0604138	0.113819	0.0857097	0.0996452	0.103596	0.0708943	0.0577642	0.0435374	0.0559716	0.0438718	0.0576065	0.0509675	0.0364383	0.0401567	0.0427462	0.103264	0.0654688	0.00335826	0.00804618	0.0239451	0.0302924	0.0588831	0.0533402	0.12117	0.0732452	0.090505	0.139852	0.108919	0.0844037	0.101976	0.0730301	0.107069	0.206015	0.110462	0.0321339		0.11617	0.130058	0.131311	2.67573
21	0.0880319	0.163461	0.0552188		0.0811617	0.113923	0.0486783	0.0536259	0.0932007	0.0731244	0.11011	0.0893156	0.103264	0.107214	0.0744951	0.0595411	0.0471263	0.0577397	0.0474595	0.0630288	0.0490767	0.0408666	0.0531883	0.0880704	0.116251	0.0784869	0.0032298	0.0298027	0.0240351	0.0389645	0.0504288	0.0491767	0.134137	0.0776657	0.0903877	0.130241	0.0898954	0.0936961	0.0734674	0.08239	0.12613	0.186816	0.110321	0.00364898		0.112472	0.128186	0.138489	2.74224
21.5	0.0862022	0.171993	0.0930504		0.0830031	0.117588	0.0468518	0.0307027	0.0932007	0.0713009	0.117416	0.0911484	0.106948	0.107214	0.0763211	0.0631808	0.048943	0.0613729	0.0510985	0.0666796	0.0582485	0.0407743	0.0703371	0.0881252	0.124694	0.0783616	0.00310139	0.0340313	0.0411685	0.051733	0.0588831	0.0618889	0.138284	0.0775533	0.109304	0.14905	0.0803221	0.0935511	0.0922357	0.101235	0.0876609	0.215251	0.119661	0.0318739		0.119771	0.126371	0.140298	2.77834
22	0.0896954	0.176257	0.0740684		0.0883645	0.119257	0.0503666	0.0764958	0.102149	0.0766044	0.124552	0.0982974	0.108593	0.110724	0.0816421	0.0612311	0.0506242	0.0630423	0.0527618	0.0701655	0.0544097	0.0580706	0.0702871	0.110644	0.120343	0.0697045	0.00310139	0.0469712	0.0368165	0.0473962	0.0673863	0.0703803	0.125384	0.103343	0.118821	0.120633	0.0992088	0.0935511	0.0827823	0.072769	0.106836	0.234302	0.110181	0.0318739		0.119624	0.137092	0.149167	2.83521
22.5	0.08964	0.176132	0.0929809		0.0919917	0.119203	0.0521463	0.0534371	0.103915	0.07108	0.122668	0.0982367	0.108528	0.110671	0.0888914	0.063007	0.0487631	0.0611774	0.0563475	0.0701105	0.0580204	0.0579753	0.0788076	0.110531	0.120213	0.0910633	0.0314048	0.0208878	0.0410289	0.0515859	0.0630059	0.0702657	0.138085	0.0989188	0.0711798	0.120567	0.118028	0.0934786	0.11107	0.0821916	0.116364	0.196129	0.119589	0.0318089		0.125047	0.13885	0.152725	2.86739
23	0.0951834	0.184784	0.0739328		0.0883645	0.117425	0.0540184	0.0534843	0.103972	0.0820735	0.122725	0.0982974	0.114118	0.116228	0.0871188	0.070328	0.0542567	0.0648584	0.0582188	0.07929	0.0654129	0.0623102	0.0831179	0.0425434	0.133067	0.0781738	0.021883	0.0382066	0.0496383	0.0472989	0.0801118	0.0788122	0.133808	0.107532	0.0901531	0.12997	0.108519	0.0839739	0.0920938	0.0916126	0.116305	0.215105	0.128996	0.0411921		0.121448	0.140721	0.154592	2.88574
23.5	0.0878109	0.180521	0.0833534		0.0938325	0.119203	0.0539721	0.0533899	0.109384	0.0856632	0.129973	0.103733	0.115893	0.116174	0.0943675	0.0721031	0.0505791	0.070257	0.0599851	0.0774095	0.0653552	0.0666934	0.0874798	0.0877968	0.137418	0.0997207	0.0407255	0.0555787	0.0582958	0.064497	0.0673344	0.0788702	0.129596	0.107591	0.109123	0.167781	0.117893	0.0744707	0.110925	0.0725733	0.12583	0.234078	0.166833	0.0694685		0.126872	0.140664	0.156341	2.92333
24	0.0969005	0.180521	0.0929809		0.0956184	0.117317	0.057577	0.0764465	0.100214	0.0837839	0.126263	0.100008	0.117668	0.108783	0.0906636	0.0738779	0.0541658	0.0702074	0.0562952	0.0718802	0.0707982	0.0623582	0.0874798	0.0879062	0.137418	0.091127	0.0503165	0.0512487	0.0626009	0.064497	0.0758881	0.0745966	0.138151	0.111899	0.109244	0.139509	0.118028	0.102912	0.11107	0.101167	0.135537	0.224703	0.138547	0.050707		0.13047	0.133349	0.15809	2.94468
24.5	0.0969005	0.184784	0.0833534		0.097459	0.113653	0.0594026	0.0763973	0.11115	0.0801384	0.128089	0.109168	0.115827	0.114286	0.0979645	0.0738779	0.0559816	0.0756547	0.0617512	0.0828277	0.0799658	0.066645	0.0874282	0.0878515	0.141636	0.108249	0.0312714	0.0208878	0.053943	0.0644468	0.0758354	0.0745389	0.125254	0.120453	0.109123	0.129902	0.108452	0.0933338	0.129826	0.101032	0.12583	0.234078	0.157356	0.0411263		0.126822	0.133349	0.15809	2.95009
25	0.0950157	0.197698	0.10226		0.101085	0.119094	0.0593558	0.0534371	0.111092	0.0910179	0.133509	0.109106	0.119442	0.116067	0.0960857	0.0756524	0.063199	0.0701577	0.0707908	0.0809473	0.0799069	0.0665966	0.104616	0.110531	0.145854	0.108184	0.0595646	0.0511427	0.0711126	0.0515368	0.0757826	0.0830269	0.125189	0.124699	0.0805225	0.139304	0.127266	0.0932613	0.101402	0.100964	0.12577	0.234003	0.166758	0.0788468		0.132244	0.135107	0.158031	2.96422
[truncated: 41 more columns]

## Sheet: Figure 4 (AC18)
S12 Gene
	H2O control							Males																																									Female
Time (min)	1	2	3	4	5	6		1	2	3	4	5	6	7	8	9	10	11	12	13	14	15	16	17	18	19	20	21	22	23	24	25	26	27	28	29	30	31	32	33	34	35	36	37	38	39	40		1
0.5	-0.057577	-0.0359107	-0.136071	-0.0801797	-0.0498346	-0.0395938		-0.0817017	-0.0936691	-0.0497257	-0.0438932	-0.0692794	-0.053956	-0.0649872	-0.054901	-0.115983	-0.102578	-0.0288231	-0.0588179	-0.0285625	-0.0561132	-0.0273373	-0.0228677	-0.0325975	-0.151769	-0.109248	-0.0543916	-0.136126	-0.116675	-0.105417	-0.102655	-0.142193	-0.112628	-0.063652	-0.107844	-0.0799104	-0.0564587	-0.189192	-0.333311	-0.23714	-0.351096	-0.238785	-0.388415	-0.330216	-0.364826	-0.253335	-0.169032		-0.062225
1	-0.0338958	-0.0416812	-0.0115086	-0.0472015	0.0165127	-0.0552115		-0.0459994	-0.0642527	-0.0263704	-0.024237	-0.0402196	-0.0522636	-0.0358298	-0.0255352	-0.104066	-0.0610943	-0.0229197	-0.0297481	-0.0227246	-0.0271909	-0.0272882	-0.0169827	-0.0207482	-0.0486566	-0.0277755	-0.0304403	-0.015289	-0.0153426	-0.0645531	-0.0199445	-0.101398	-0.0519135	-0.0234129	-0.0676526	0.000797362	-0.0565825	-0.092358	-0.268923	-0.141611	-0.349719	-0.174219	-0.355144	-0.296503	-0.267209	-0.283908	-0.104426		-0.0326803
1.5	-0.00968667	-0.0119136	0.00858378	0.0177421	-0.014266	-0.00141302		-0.00975311	-0.0460678	-0.00253908	-0.0228725	0.00674509	-0.0332447	-0.0119023	-0.0307447	-0.0797125	-0.0606238	-0.0107295	-0.0234336	-0.0106215	-0.0036436	-0.00365757	-0.0165283	-0.0202602	0.0126413	0.032836	-0.0145981	-0.0158715	0.0043113	-0.00378547	0.00022084	0.0206937	-0.0119209	-0.00379976	0.032475	0.0204167	-0.0161428	-0.154605	-0.235794	-0.139982	-0.190791	-0.109275	-0.225714	-0.229924	-0.233527	-0.218675	-0.0711853		-0.00849588
2	0.00259379	0.000229277	0.00844627	0.0189897	-0.0130184	-2.89791e-05		-0.0271172	-0.0162389	-0.00212466	-0.00361658	0.00718221	-0.014248	0.000255813	0.0108135	-0.0436259	-0.0365582	0.00136325	-0.0114182	0.012939	-0.00329592	-0.00330387	0.00134707	-0.00807305	0.0125146	-0.0284089	0.00318053	0.00415418	0.00418436	0.0165528	0.000113741	0.000143355	0.0284818	-0.0039114	-0.00791797	0.00011148	0.00425515	-0.0576934	-0.108036	-0.0758067	-0.0949559	-0.107996	-0.0964441	-0.0330364	-0.0390565	-0.0898233	-0.0382727		0.0037747
2.5	0.0144144	0.0235913	-0.0336143	-0.0430947	-0.0116211	0.0364508		0.0323386	0.0190218	0.0153663	-0.00222435	0.00718221	0.00486063	0.011902	0.0108135	0.0334434	0.0108405	0.0130744	0.0118162	0.00137155	0.00826555	0.0140951	0.00134707	0.0155415	-0.00861085	-0.0288306	0.0159288	0.00367914	0.00367692	-0.00451268	-0.000314398	0.0201035	0.0280236	0.0157898	0.0117322	-0.020524	0.0242482	0.0395664	0.146897	0.0516945	0.158931	0.0520361	0.161366	0.164424	0.123729	0.135355	-0.0051497		0.0155786
3	0.0265743	0.0297741	0.0280928	0.0535644	0.0223928	0.0202028		0.050531	0.107538	0.0156678	0.0529504	0.0191101	0.0948956	0.0355743	0.0346529	0.193961	0.147436	0.0192116	0.0527837	0.0190356	0.0258649	0.0201545	0.0308168	0.0335399	0.0321115	0.052179	0.025929	0.0233272	0.00316997	0.0562984	0.0199243	0.0604572	0.00732903	0.0153343	0.0313634	-0.00080149	0.044222	0.26509	0.465855	0.305705	0.476535	0.339454	0.515937	0.395039	0.416063	0.457052	0.219034		0.0218229
3.5	0.0264385	0.0413203	0.0280229	0.0543217	0.0231506	0.0388614		0.0979619	0.307239	0.0388728	0.0540473	0.0247908	0.167165	0.0528948	0.0814262	0.478396	0.342861	0.0542387	0.081709	0.0478341	0.0546709	0.0258513	0.03071	0.068853	0.0114391	0.0317649	0.0376814	0.0433881	0.0436138	0.0562221	0.0405348	0.0603959	0.128686	0.0756872	0.0514158	0.0798131	0.0441541	0.522227	0.562179	0.622422	0.667261	0.594675	0.645473	0.657868	0.514064	0.554187	0.410987		0.00987997
4	0.0383985	0.0531432	0.027604	-0.00804483	0.024441	0.057247		0.21111	0.571944	0.0331641	0.0909014	0.0597642	0.363835	0.134597	0.157848	0.816632	0.597858	0.130501	0.267767	0.0826755	0.112602	0.0607643	0.0483437	0.18708	0.0522611	0.0721255	0.0518544	0.043018	0.0432194	0.0557646	0.0401994	0.0600278	0.067622	0.0753241	0.0510386	0.119763	0.0847436	0.684326	0.691242	0.845649	0.827581	0.755707	0.840349	0.725379	0.710047	0.716377	0.667692		0.0454378
4.5	0.0505693	0.0651809	0.0274644	0.0248205	0.123585	0.0760459		0.419735	0.831182	0.0451387	0.200359	0.0949494	0.685998	0.257366	0.299102	1.1198	0.758385	0.265575	0.488998	0.146667	0.228569	0.130674	0.0661482	0.370537	0.0109338	0.153395	0.0681873	0.10323	0.043088	0.0965181	0.0400877	0.0599051	0.0877286	0.09533	0.0509129	0.139793	0.125594	0.814291	0.851974	0.910736	0.98778	0.94849	0.970885	0.825438	0.873647	0.750174	0.860717		0.051693
5	0.0507774	0.0653929	0.0476306	-0.00631114	-0.00644554	0.0417361		0.693725	1.02562	0.0978392	0.345689	0.17069	0.954645	0.484912	0.551755	1.36349	0.877279	0.459173	0.681095	0.297372	0.379177	0.24113	0.136456	0.583467	0.0516052	0.254571	0.0929514	0.0625038	0.0223285	0.095889	0.0602863	0.0594149	0.0468105	0.0948367	0.0906001	0.320606	0.309386	0.879734	0.980585	1.13364	1.05261	1.07729	1.06885	0.859518	0.842588	0.879823	0.989667		0.0755303
5.5	0.0683812	0.0769403	0.0680662	0.121903	0.0596836	0.0952759		0.955284	1.16062	0.167719	0.545304	0.286741	1.16998	0.828497	0.839099	1.52335	0.971921	0.64065	0.837833	0.459264	0.546784	0.415104	0.20647	0.825495	0.133676	0.498277	0.123018	0.0823499	0.143446	0.218204	0.0806986	0.0795569	0.107211	0.114703	0.0702494	0.461307	0.493379	1.00938	1.1092	1.26164	1.21241	1.23796	1.16678	1.09046	0.973416	1.0416	1.11863		0.104916
6	0.080352	0.0887731	0.0473468	0.186692	0.093377	0.0960672		1.15189	1.31381	0.272886	0.799383	0.467026	1.33203	1.1784	1.1152	1.68981	1.05516	0.799061	0.965939	0.679395	0.703151	0.612597	0.34688	1.00886	0.216008	0.701597	0.173562	0.0622527	0.204134	0.422587	0.0806986	0.0795569	0.147633	0.17504	0.0903394	0.582169	0.718669	1.13959	1.20656	1.48534	1.27778	1.33551	1.23311	1.19072	1.20213	1.13973	1.18424		0.122783
6.5	0.0862669	0.0887731	0.0882717	0.0595719	0.0611718	0.0967801		1.2947	1.41967	0.418759	1.07172	0.606479	1.47625	1.42899	1.32649	1.80254	1.1441	0.922124	1.07058	0.876194	0.807285	0.798331	0.516389	1.15066	0.338928	0.883834	0.227618	0.162258	0.304711	0.605767	0.183449	0.119877	0.2684	0.214783	0.0898835	0.722472	0.840745	1.20491	1.30327	1.58163	1.31067	1.46427	1.29869	1.19176	1.10586	1.23723	1.24921		0.181848
7	0.0804231	0.0946906	0.0674169	0.0919688	0.0944218	0.150364		1.42576	1.51981	0.558889	1.29007	0.780904	1.56702	1.61565	1.491	1.94513	1.25097	0.998421	1.1579	1.05575	0.894168	0.955152	0.680145	1.26305	0.503339	1.00555	0.29813	0.16212	0.506732	0.809821	0.224579	0.099371	0.288457	0.254848	0.129911	0.802803	0.922393	1.33448	1.33611	1.67783	1.40688	1.52912	1.49304	1.32416	1.23658	1.27032	1.47404		0.240995
7.5	0.109854	0.106235	0.0878317	0.0926745	0.062349	0.0978906		1.5504	1.643	0.768747	1.4718	0.949181	1.65721	1.79013	1.655	2.07526	1.3515	1.09781	1.25065	1.19441	0.986519	1.07682	0.843613	1.38685	0.749773	1.22856	0.370872	0.22209	0.647853	0.952291	0.368681	0.16023	0.429534	0.435435	0.209939	0.903022	1.0447	1.46463	1.40138	1.80638	1.5672	1.69036	1.55915	1.45714	1.23798	1.43265	1.69956		0.341237
8	0.121535	0.111933	0.0671286	0.15708	0.0300118	0.133718		1.67501	1.73675	0.931884	1.61778	1.08837	1.76569	1.94125	1.78962	2.16383	1.46979	1.19717	1.36081	1.34461	1.08463	1.17524	1.0012	1.48699	0.873176	1.35046	0.456225	0.342579	0.890415	1.11567	0.533676	0.180601	0.510316	0.535918	0.209939	1.02379	1.16749	1.72323	1.56194	1.96623	1.66358	1.88314	1.75377	1.52394	1.40136	1.59462	1.86072		0.441455
8.5	0.139501	0.129689	0.108088	0.0934596	0.0959517	0.133963		1.80642	1.85489	1.08394	1.8175	1.22239	1.87353	2.09335	1.88407	2.29498	1.59474	1.30303	1.50656	1.4608	1.17176	1.28588	1.1009	1.61741	1.03697	1.49181	0.542644	0.482623	1.03116	1.21691	0.677481	0.200554	0.570364	0.635837	0.30984	1.10356	1.30988	1.88499	1.62649	2.22104	1.82319	2.04369	1.91586	1.59044	1.46701	1.65972	2.18175		0.577587
9	0.133289	0.146921	0.107939	0.0299584	0.0636071	0.15185		2.01392	1.91886	1.22344	1.90861	1.32061	1.98141	2.19159	1.97721	2.37123	1.69491	1.39038	1.65707	1.58173	1.28695	1.37821	1.23483	1.82354	1.20117	1.61336	0.639538	0.562735	1.19254	1.33909	0.80098	0.261498	0.671114	0.756172	0.410007	1.18379	1.39142	2.015	1.72337	2.31761	1.91972	2.17278	2.04618	1.7561	1.53304	1.75744	2.40725		0.695282
9.5	0.157018	0.164529	0.169784	0.12624	0.0967584	0.152595		2.26397	2.04253	1.35775	2.00089	1.41951	2.12629	2.30833	2.0889	2.50788	1.78993	1.56043	1.81416	1.73814	1.43168	1.4654	1.35769	2.00683	1.26243	1.75503	0.737588	0.723003	1.27294	1.46108	0.965561	0.363066	0.751555	0.876369	0.530121	1.28398	1.49323	2.20916	1.94769	2.57265	2.01591	2.30152	2.24071	1.85562	1.72883	1.85485	2.63246		0.831217
10	0.156867	0.170219	0.190394	0.158316	0.162515	0.170415		2.4896	2.1421	1.4858	2.21879	1.52377	2.25199	2.45355	2.18238	2.60826	1.89037	1.71831	1.98235	1.8709	1.60492	1.54635	1.48597	2.2132	1.48837	2.01879	0.839567	0.883438	1.41419	1.60378	1.08911	0.444412	0.85236	0.996755	0.630329	1.40453	1.67713	2.37052	2.01178	2.6682	2.33401	2.52557	2.43462	2.05341	1.85909	2.11284	2.85705		0.966792
10.5	0.186355	0.170142	0.148633	0.158563	0.0642371	0.223464		2.72136	2.25362	1.59648	2.34588	1.62817	2.37751	2.56984	2.31125	2.75036	2.0206	1.85874	2.11583	2.07324	1.7667	1.69126	1.64944	2.41382	1.5698	2.20057	0.943843	1.00325	1.53461	1.74574	1.17093	0.525392	0.952702	1.13671	0.750164	1.48425	1.83985	2.40341	2.23602	2.85959	2.39829	2.71815	2.59676	2.25165	1.95724	2.37129	3.01806		1.09066
11	0.203936	0.187515	0.16908	0.126965	0.228901	0.276971		2.92906	2.31788	1.71864	2.60102	1.74401	2.57578	2.68588	2.43402	2.89813	2.16248	1.98727	2.24909	2.27536	1.96299	1.78378	1.84777	2.62011	1.71312	2.36235	1.04889	1.16335	1.65528	1.92879	1.29415	0.565818	1.03305	1.19656	0.830052	1.52402	1.94153	2.63023	2.36494	3.05158	2.59029	2.84734	2.82407	2.35156	2.08837	2.46912	3.17966		1.20847
11.5	0.221672	0.205042	0.148325	0.191072	0.097566	0.277151		3.14316	2.48248	1.82945	2.7647	1.86597	2.68369	2.83733	2.63347	3.06418	2.3225	2.11613	2.41178	2.48942	2.11333	1.95782	2.08147	2.77365	1.89783	2.58535	1.16265	1.30361	1.77625	2.17336	1.37642	0.708144	1.15395	1.29679	0.930187	1.64449	2.10486	2.85621	2.46104	3.27437	2.87679	3.03955	3.01812	2.64834	2.28378	2.69504	3.37233		1.35016
12	0.25107	0.222408	0.189124	0.159141	0.0647888	0.294998		3.30321	2.64075	1.96906	2.98283	1.98176	2.91702	2.97662	2.81485	3.26525	2.49396	2.25047	2.57986	2.65097	2.26331	2.1083	2.28557	2.94444	2.08139	2.66501	1.28146	1.50313	1.95668	2.33505	1.45782	0.788791	1.25389	1.45636	1.00954	1.76397	2.2261	2.92096	2.55716	3.56077	2.90886	3.26377	3.14759	2.71448	2.34908	2.75977	3.46881		1.46202
12.5	0.286455	0.239852	0.209873	0.25554	0.0979702	0.365756		3.46944	2.81097	2.09134	3.27331	2.13836	3.07849	3.12196	2.97297	3.44285	2.6893	2.4084	2.71907	2.84742	2.38453	2.29953	2.46646	3.10362	2.30745	2.86806	1.4066	1.60353	2.17885	2.53915	1.62269	0.910924	1.375	1.63708	1.17	1.96508	2.38976	3.01873	2.78188	3.65735	3.069	3.42489	3.27794	2.84729	2.51269	2.98651	3.59824		1.58582
13	0.29794	0.274566	0.188966	0.255717	0.262481	0.312941		3.58128	2.97456	2.23634	3.43712	2.28853	3.25816	3.30723	3.19479	3.60768	2.83653	2.5247	2.89823	2.99685	2.5456	2.47275	2.65253	3.27384	2.45056	2.96878	1.53568	1.72334	2.29933	2.70156	1.72518	0.991925	1.47538	1.71686	1.2698	2.02483	2.5117	3.27734	2.81436	3.84876	3.19683	3.5855	3.44008	2.97964	2.57826	3.01929	3.72715		1.70319
13.5	0.321321	0.291833	0.230135	0.223604	0.26239	0.383519		3.74686	3.1677	2.36982	3.61824	2.45626	3.41913	3.48106	3.35229	3.74311	2.98393	2.64115	3.02528	3.19849	2.68369	2.65188	2.82123	3.45604	2.63489	3.11026	1.6539	1.84327	2.44015	2.84378	1.78662	1.07302	1.57587	1.83689	1.36971	2.10483	2.6134	3.30933	3.00593	4.03926	3.32382	3.74522	3.5044	3.01235	2.70821	3.18029	3.88725		1.83839
14	0.350776	0.309264	0.292125	0.351891	0.295443	0.436523		3.90109	3.30843	2.5328	3.79965	2.59534	3.54453	3.69615	3.5572	3.86726	3.14361	2.81069	3.15859	3.34856	2.78749	2.8372	2.96113	3.60922	2.77858	3.29275	1.78299	1.98357	2.58137	2.94569	1.97188	1.13401	1.71697	1.9773	1.46989	2.26555	2.7768	3.40667	3.19831	4.16713	3.41986	3.90587	3.60194	3.2766	2.8389	3.34212	3.98411		1.96211
14.5	0.362857	0.332878	0.312528	0.287834	0.2297	0.472369		4.01495	3.45612	2.67917	4.01889	2.75273	3.70723	3.88917	3.69879	4.0223	3.26874	2.92259	3.31033	3.52861	2.95575	3.00022	3.12532	3.74579	2.98314	3.37309	1.90337	2.14335	2.70175	3.04684	2.11543	1.27594	1.85757	2.05699	1.58964	2.40557	2.8578	3.50347	3.19831	4.23074	3.41986	3.90587	3.76351	3.34253	2.904	3.34212	4.01619		2.08658
15	0.409949	0.367737	0.291698	0.288105	0.164211	0.507611		4.10349	3.60245	2.83027	4.18188	2.88577	3.88613	4.11558	3.85649	4.13427	3.37485	3.08019	3.40853	3.62636	3.11133	3.12731	3.2533	3.88097	3.06474	3.49421	2.01702	2.20309	2.86265	3.14822	2.25912	1.31632	1.87739	2.13684	1.66945	2.4855	2.93901	3.53659	3.29507	4.35898	3.64354	4.06689	3.86142	3.3104	2.90477	3.43975	4.01713		2.2219
15.5	0.433214	0.396569	0.332573	0.320139	0.328599	0.454393		4.20919	3.70704	2.96921	4.34452	3.0183	3.93928	4.23652	3.99008	4.21591	3.47448	3.17872	3.50617	3.82178	3.2086	3.27707	3.42159	3.97423	3.24815	3.65501	2.1268	2.38242	2.96229	3.28951	2.34047	1.45788	1.97727	2.2963	1.76877	2.56479	3.01946	3.73021	3.39102	4.4226	3.61171	4.13091	3.89374	3.37634	3.13267	3.53654	4.17758		2.33907
16	0.468656	0.414081	0.312009	0.320139	0.295721	0.525283		4.33398	3.81864	3.11489	4.38147	3.15756	4.06532	4.42858	4.14248	4.32849	3.59292	3.27235	3.59906	3.95473	3.32993	3.41618	3.56753	4.10994	3.35099	3.69582	2.21788	2.44272	3.02302	3.37127	2.46411	1.62059	2.11847	2.37668	1.94916	2.62523	3.10136	3.66567	3.39102	4.51804	3.77085	4.25897	3.99069	3.50823	3.10011	3.5688	4.24175		2.47474
16.5	0.480375	0.4315	0.394618	0.320232	0.328694	0.507924		4.39307	3.92407	3.2137	4.50951	3.25596	4.15588	4.52717	4.2418	4.36963	3.68738	3.37744	3.69747	4.04114	3.42212	3.51446	3.69568	4.18044	3.49461	3.77688	2.30293	2.60297	3.18433	3.45276	2.58755	1.70187	2.15876	2.47692	2.02926	2.70555	3.18302	3.79506	3.42328	4.5502	3.77117	4.22729	4.02335	3.54149	3.10038	3.69815	4.24208		2.5689
17	0.491997	0.472169	0.414807	0.320324	0.36167	0.525388		4.43994	3.98806	3.3472	4.6177	3.35987	4.13732	4.61958	4.32905	4.42819	3.74011	3.45299	3.75495	4.15612	3.55447	3.65303	3.82937	4.24472	3.57529	3.87678	2.38316	2.68201	3.30401	3.55319	2.70991	1.78234	2.31895	2.59614	2.06839	2.82489	3.20215	3.85991	3.48754	4.61418	3.89881	4.32368	4.056	3.60774	3.32857	3.63392	4.3066		2.67461
17.5	0.509909	0.478196	0.476745	0.352268	0.295814	0.543061		4.52974	4.08852	3.46425	4.67214	3.46484	4.209	4.73668	4.40005	4.49405	3.84134	3.50618	3.80196	4.24344	3.62432	3.72312	3.97002	4.33384	3.61632	3.93756	2.43784	2.82219	3.36449	3.63466	2.79218	1.90423	2.35923	2.59614	2.20853	2.80482	3.30419	3.82733	3.61518	4.64564	3.803	4.32334	4.15263	3.67339	3.16549	3.73042	4.33835		2.79894
18	0.545152	0.524696	0.456004	0.41634	0.493092	0.525283		4.58253	4.16424	3.57442	4.72622	3.54553	4.28036	4.83488	4.46384	4.51705	3.91181	3.59342	3.85943	4.34106	3.69311	3.84428	4.06282	4.3863	3.7596	3.93727	2.48971	2.94211	3.44485	3.614	2.85366	1.965	2.45973	2.69613	2.2884	2.94509	3.32434	3.95642	3.55122	4.64564	3.83482	4.35535	4.12031	3.77232	3.32829	3.73042	4.43463		2.88103
18.5	0.562569	0.518566	0.51784	0.447977	0.42693	0.596081		4.60526	4.25136	3.66097	4.8173	3.62012	4.31652	4.86288	4.53898	4.54562	3.95829	3.62771	3.89919	4.41522	3.77315	3.91876	4.14363	4.42073	3.80033	3.9775	2.52629	3.02197	3.54536	3.6748	2.97683	2.0867	2.60049	2.71596	2.38829	2.985	3.36489	3.85838	3.55003	4.6124	3.86536	4.38598	4.18358	3.80406	3.32716	3.79371	4.49744		2.94518
19	0.562569	0.530236	0.497099	0.416242	0.46011	0.560627		4.65872	4.26898	3.71922	4.78066	3.69552	4.3162	4.92687	4.60344	4.53969	4.01157	3.69206	3.96302	4.46145	3.81935	3.97671	4.24866	4.50921	3.88207	4.09875	2.56971	3.10183	3.60555	3.75596	3.01772	2.18807	2.58014	2.83596	2.48817	3.00483	3.44624	3.92384	3.55092	4.77252	3.80268	4.51507	4.24925	3.87093	3.36056	3.8269	4.43429		3.02183
19.5	0.580183	0.541808	0.538083	0.416144	0.460007	0.560627		4.67619	4.33911	3.80631	4.87138	3.75324	4.28036	4.95559	4.63238	4.49788	4.05863	3.74444	4.00335	4.50734	3.88838	4.04595	4.30087	4.50888	3.88118	4.09785	2.59746	3.18117	3.60471	3.77543	3.0787	2.22812	2.59965	2.91543	2.50755	3.04425	3.38422	3.89126	3.45469	4.67673	3.83418	4.48271	4.15195	3.83765	3.36028	3.89111	4.46604		3.12182
20	0.579981	0.559112	0.599999	0.448177	0.525759	0.595862		4.69331	4.37955	3.8465	4.9073	3.78747	4.28003	4.98393	4.62582	4.5268	4.12905	3.76727	4.04337	4.56445	3.93978	4.10329	4.37026	4.5672	4.0042	4.15861	2.62498	3.22121	3.66516	3.71435	3.14038	2.37027	2.74058	2.99556	2.60761	3.10445	3.46583	3.95579	3.55062	4.74035	3.92966	4.4507	4.28122	3.93656	3.39283	3.82659	4.5623		3.16258
20.5	0.579678	0.564645	0.578848	0.480311	0.558743	0.542849		4.71008	4.3903	3.90386	4.92545	3.81559	4.33378	5.00026	4.67748	4.61456	4.15181	3.81906	4.08888	4.61543	3.96779	4.14874	4.41599	4.59569	3.9822	4.21784	2.64022	3.27999	3.72419	3.83499	3.18029	2.43018	2.79986	3.01442	2.66655	3.12329	3.44407	3.95611	3.55092	4.7089	3.92999	4.54709	4.21693	3.93687	3.42568	3.8269	4.65891		3.20896
21	0.609192	0.558811	0.599066	0.479801	0.525332	0.542742		4.72195	4.40791	3.92715	4.83437	3.85618	4.29762	5.02934	4.70091	4.67969	4.17547	3.8717	4.11788	4.64431	4.01398	4.17191	4.45682	4.63107	4.06297	4.15588	2.66555	3.359	3.76332	3.81344	3.22041	2.46996	2.77885	3.0335	2.74568	3.12232	3.54494	4.01907	3.61338	4.64349	3.92835	4.54531	4.34444	4.00122	3.39169	3.8576	4.72131		3.23844
21.5	0.608884	0.576007	0.599481	0.512138	0.525652	0.56009		4.70903	4.39518	3.99031	4.92398	3.91328	4.29664	5.02821	4.68813	4.73781	4.18639	3.90592	4.14597	4.6664	4.0766	4.23471	4.47919	4.65365	4.04369	4.19759	2.66939	3.38005	3.76447	3.93676	3.18029	2.55199	2.86024	3.03444	2.76658	3.16341	3.54605	3.95548	3.61428	4.67637	4.12027	4.6104	4.47476	3.87031	3.36	3.82628	4.65821		3.25533
22	0.602982	0.576007	0.557912	0.51193	0.525439	0.56052		4.72684	4.41278	3.99613	4.9073	3.90168	4.26211	5.06892	4.72326	4.76741	4.24555	3.92931	4.16917	4.67795	4.11123	4.24629	4.52585	4.65365	4.04278	4.19667	2.68161	3.45931	3.80389	3.89514	3.22066	2.65285	2.85956	3.07378	2.84592	3.12256	3.54522	4.05165	3.61368	4.70745	4.02414	4.64168	4.47404	3.93561	3.35943	3.95468	4.72166		3.29069
22.5	0.626693	0.576109	0.599377	0.6079	0.591068	0.542423		4.68563	4.3779	4.04883	4.86956	3.93097	4.2429	5.08093	4.72362	4.80922	4.24586	3.93544	4.15208	4.68984	4.14039	4.26397	4.5495	4.68346	4.10487	4.23777	2.68395	3.53989	3.82462	3.9568	3.28281	2.71418	2.94052	3.13434	2.9464	3.18323	3.52538	3.98681	3.64536	4.64349	4.15107	4.73733	4.50598	3.96826	3.42424	3.98662	4.68923		3.32632
23	0.61458	0.610793	0.557912	0.608229	0.591399	0.577648		4.66677	4.40038	4.03628	4.85106	3.94747	4.29631	5.07398	4.69913	4.83771	4.21535	3.95211	4.13955	4.68881	4.1799	4.33254	4.61267	4.68245	4.10426	4.27765	2.68878	3.51934	3.86432	3.95618	3.28231	2.77464	2.9803	3.13386	2.94593	3.08245	3.60639	4.14908	3.71021	4.77179	4.08845	4.83446	4.60402	4.00218	3.52276	4.05209	4.65821		3.33731
23.5	0.632179	0.604859	0.59917	0.576091	0.624161	0.595424		4.65455	4.40592	4.07673	4.8877	3.99354	4.29664	5.10267	4.67535	4.86694	4.25053	3.95766	4.13345	4.64805	4.19114	4.29749	4.60068	4.67033	4.10426	4.29789	2.68817	3.51934	3.88446	3.89514	3.34396	2.83553	3.02055	3.17391	2.94593	3.14262	3.54522	4.11649	3.67793	4.77142	4.15175	4.8661	4.63596	4.06779	3.52247	4.08403	4.68994		3.31936
24	0.626174	0.610587	0.619589	0.67161	0.623599	0.559875		4.6542	4.43492	4.05314	4.90511	3.99324	4.34972	5.07903	4.68085	4.90208	4.26205	3.93983	4.18533	4.63616	4.20238	4.31455	4.60035	4.64053	4.10364	4.23654	2.68976	3.55881	3.92414	3.89453	3.34345	2.85537	3.06031	3.21346	2.98546	3.14213	3.4835	4.24391	3.70838	4.80139	4.15006	4.92822	4.69872	4.09914	3.61863	4.0824	4.65609		3.32499
24.5	0.64946	0.621936	0.702095	0.607572	0.623599	0.577432		4.6591	4.47499	4.05223	4.92288	3.98075	4.40312	5.08952	4.73832	4.95422	4.27886	3.9448	4.24818	4.65823	4.21879	4.35414	4.62269	4.63952	4.1856	4.25679	2.67507	3.57882	3.88387	3.91487	3.34345	2.91626	3.06031	3.2535	3.06546	3.20229	3.54466	4.1794	3.74035	4.76959	4.24549	4.86422	4.73102	4.16505	3.48846	4.11465	4.68817		3.3183
25	0.655254	0.592686	0.660413	0.671723	0.623711	0.559661		4.66468	4.46879	4.03447	5.01319	3.99203	4.36696	5.06008	4.76138	4.99526	4.32585	3.96789	4.31744	4.66367	4.21849	4.33647	4.57573	4.65098	4.16387	4.27579	2.67101	3.51772	3.90282	3.8933	3.40407	2.9762	3.07948	3.2525	3.10447	3.22135	3.56394	4.24424	3.80459	4.86535	4.21402	5.0246	4.69909	4.09946	3.55384	4.14722	4.7206		3.3357
AC18
	H2O control							Males																																									Female
Time (min)	1	2	3	4	5	6		1	2	3	4	5	6	7	8	9	10	11	12	13	14	15	16	17	18	19	20	21	22	23	24	25	26	27	28	29	30	31	32	33	34	35	36	37	38	39	40		1
0.5	-0.0267691	-0.0343681	-0.0431286	-0.0216711	0.0118881	-0.000810421		-0.0286655	-0.0324096	-0.0226055	0.0125976	-0.0206155	-0.0248988	-0.0128037	-0.0225078	-0.00893688	-0.0111884	-0.022785	-0.0284534	-0.0360629	-0.0283736	0.00062558	-0.00709996	-0.0246529	-0.0519505	-0.00690877	-0.0152116	-0.0217593	-0.05138	-0.0634725	-0.0338931	-0.0248843	-0.0336283	-0.0276601	-0.0483407	-0.0247085	-0.0485337	0.0115102	-0.0433239	0.032474	-0.0352087	-0.0355171	-0.0700248	-0.0373197	0.0875136	-0.0231718	-0.0498972		-0.0345723
1	-0.0171636	-0.00537057	0.00249423	-0.0236282	-0.059236	0.00713284		0.0201179	-0.00338665	-0.0228003	-0.018678	-0.0208098	-0.0166496	-0.00334152	-0.00332348	-0.0189185	0.00823043	-0.00348318	-0.018938	-0.026585	-0.00922755	-0.0092242	-0.0169797	-0.00537567	-0.00649517	-0.0213346	-0.00595331	0.00830851	0.0083188	0.0113005	0.0115778	-0.0542241	-0.01831	0.00244129	-0.00350054	-0.00940329	-0.0183393	0.00984064	-0.0106641	-0.0376363	-0.0371586	0.0307444	-0.00342012	-0.004055	-0.0178907	0.00967391	-0.0173299		-0.0151873
1.5	0.0118767	0.0137549	-0.0122062	-0.0595744	-0.0261578	-0.00420391		0.00995244	0.00599943	0.0156659	-0.000447672	0.0175621	0.00147731	0.00596721	-0.0134092	0.000179897	-0.0116213	-0.00376514	-0.00954865	0.00208375	-0.00952025	-0.00952575	-0.0172906	-0.00569226	-0.00616064	-0.00611804	0.00147801	-0.0208583	-0.00609635	0.0117027	-0.0331958	0.00580125	-0.00313293	-0.0120105	-0.00313173	0.00574167	0.0117256	-0.0261116	-0.0122486	-0.00524306	-0.0390193	-0.0391857	-0.00521664	-0.00559192	-0.019344	-0.0261318	-0.0189856		0.0138376
2	0.0117495	-0.00581963	-0.0270903	0.00673588	0.075935	0.00371349		-0.0489492	-0.00387892	-0.00386239	0.01757	-0.00191834	0.0193946	-0.0038548	0.00583674	2.18771e-05	-0.00194497	-0.00387785	0.0193874	-0.00770962	1.50514e-05	0.0289942	0.0213226	-0.00581882	0.00901538	0.00895226	-0.00198098	-0.0354533	-0.00590765	0.0119039	-0.00299702	0.0358379	-0.00296722	-0.0118374	-0.00294719	-0.00886165	0.0119032	0.0410201	0.0203462	0.0270918	0.0947595	0.0269669	-0.006928	0.0275998	0.0480897	0.04093	0.04761		0.0137051
2.5	0.00178111	-0.00601191	0.0483777	0.0390113	-0.0290709	0.00223574		0.00958594	-0.0138231	0.0153246	-0.00344127	-0.0021174	0.00828568	0.00559654	0.00560342	-0.0196914	-0.0118916	0.0056774	-0.000167714	0.0210687	0.00948669	-0.0194846	0.00176226	-0.00600857	0.00918685	0.00911471	0.00022603	0.0238411	0.00908914	-0.0324799	0.0272178	0.0210853	-0.00280141	0.0179623	-0.00276254	0.0209027	-0.00278971	-0.0288721	0.0189172	-0.00836894	0.0252551	0.0252979	-0.00847783	-0.00838185	-0.0563286	0.00540156	-0.021991		-0.0158238
3	-0.00824372	0.00344722	-0.0115754	0.0374553	0.0385297	-0.00887817		0.00929298	0.0150893	-0.00432784	0.00499698	0.0072834	-0.012508	-0.00436743	0.00529253	0.0384081	0.0172275	0.00544876	0.009267	0.0111421	0.00924605	0.00924035	0.0111854	0.0228953	-0.00554642	0.00938564	0.00623025	0.0241619	-0.00540394	-0.00242726	-0.00260284	-0.00850024	0.0272115	0.00344431	0.012342	-0.00837946	-0.00249983	0.00412292	-0.0163508	0.0241565	-0.0438367	-0.0438234	0.0240426	-0.00957101	0.0454736	-0.0298737	0.0106965		0.00346849
3.5	0.00140499	0.0130311	0.0491936	-0.0316906	0.0716226	0.00921682		0.00914658	-0.00451094	0.0149155	0.00390405	0.00714912	0.00587055	0.0244841	0.00513716	0.00904449	-0.00243899	0.0247727	0.00914288	-0.00829805	0.00912579	0.0187689	0.0207327	0.00332944	-0.00509895	0.0247526	0.00141828	0.0098794	0.0395757	0.0129789	-0.00220809	0.00690774	0.0276756	0.0187477	0.0424599	0.0217211	-0.00203549	-0.0311564	-0.0514388	0.0228499	0.0222451	0.0561518	-0.0111765	-0.148621	-0.0241653	0.0371703	-0.0583942		0.00333794
4	0.00121708	0.0225449	-0.0259685	0.03453	0.0359833	0.0177206		-0.010637	0.0147298	-0.00465995	0.0126459	-0.00271395	0.00486888	0.0145935	0.00490422	-0.000925059	0.0169446	0.0148797	0.00895679	0.0204574	0.0185875	0.0185807	0.0108623	0.00313739	-0.0199102	-0.0049015	0.013025	-0.00467033	-0.00464705	-0.0165201	-0.0170667	-0.022774	-0.0018602	0.00415415	-0.0165267	0.00715922	-0.0166962	0.0358719	-0.0864188	-0.0122061	0.02079	-0.0127211	-0.0124811	-0.0118066	0.0089638	-0.031976	-0.0256803		-0.0163956
4.5	0.0107963	0.0223453	0.00449137	0.0334163	0.0350138	0.0166745		-0.0597483	0.0339603	0.0145068	0.0116824	0.026065	-0.00574896	0.014369	0.0240436	0.0182941	0.0265464	0.0244198	0.0281162	0.0299017	0.0280441	0.0280399	0.000997089	0.0126574	-0.0497205	0.0252535	0.0138352	-0.00436166	0.0105057	0.0135849	-0.0318891	-0.0224952	-0.0313642	0.0192926	-0.00140546	-0.00735255	-0.00151233	0.000923296	0.0819921	0.0879813	-0.0139467	0.12092	-0.013476	0.0561202	0.0422629	0.0690912	0.00722678		0.0029466
5	0.010606	0.00273407	0.0346702	0.0323052	0.0340465	-0.00347652		-0.0501725	0.0142989	0.0336632	0.0302696	0.0162021	0.0320948	0.0334611	0.0238058	0.00832744	0.00683662	0.0242435	0.018255	0.0200504	0.018222	0.0374941	0.010475	0.012463	0.0104471	0.0252535	0.0128858	0.0104466	0.0253426	0.0135849	0.0132996	-0.007531	-0.00158284	0.00445036	0.0282323	-0.0221733	0.0133874	0.0680155	-0.0204085	-0.0141111	-0.0486017	0.0188466	-0.0144686	0.0208416	0.0413797	0.0681729	0.00627227		-0.0167763
5.5	0.010606	0.0221457	0.0347934	-0.0359837	0.0332299	0.0243187		-0.0697262	0.0240193	0.0239829	0.019628	0.0162021	0.0215364	0.0141447	0.00443871	0.00832744	0.0263743	0.00482083	-0.00108527	0.0104051	0.018222	0.00856003	0.000806052	0.0318818	-0.00448266	-0.00453027	0.0138973	0.0105728	0.0106347	-0.0309603	-0.00166441	-0.00741678	0.0283147	0.0342586	0.0135397	-0.0220549	-0.0162983	0.0332524	0.0126206	0.0860073	0.0847465	0.0515394	0.0183863	0.0200906	0.108774	0.0335153	0.039217		0.00275108
6	0.0300046	0.0317169	0.035225	-0.10421	-0.00182244	0.0232681		-0.0405332	0.023874	0.0141665	0.0186592	0.0160664	0.0205863	0.0236517	0.0236472	-0.00155523	0.0360266	0.024126	0.0277978	0.0199148	0.0277354	0.00843648	0.0103459	0.0511641	0.0109641	0.0107984	0.0167277	-0.00380536	0.0259356	0.0141919	0.0137571	-0.0219929	-0.0159855	0.0346923	-0.000848769	-0.0216402	-0.0159	0.0663222	0.0117794	0.0514193	-0.0168969	0.151197	-0.0835319	-0.0150044	0.0398221	-0.00113755	0.004589		-0.00714113
6.5	0.0104158	0.0316495	0.00508106	-0.00411222	-0.0366635	-0.00601366		-0.0210534	0.043237	0.0237763	0.0181067	0.0159986	0.0200445	0.0332317	0.0138871	0.0275338	0.016436	0.00464979	0.0374018	0.0294898	0.0276737	0.037301	0.0199477	0.0122686	-0.0341442	0.025811	0.0161169	-0.00374349	0.0111514	-0.00064449	-0.00126833	0.00801797	-0.0159312	0.019899	0.0140452	0.00808683	-0.030756	-0.00218199	0.0784825	0.0170577	0.0157745	0.116731	-0.0169778	-0.0156535	0.0391469	0.0320365	0.00385933		0.00255567
7	0.0299395	0.0219463	0.0204858	-0.0719351	0.0310109	0.0126644		0.0375918	0.0238014	0.0237763	0.0273967	0.0256526	0.0389154	0.0428873	0.0429299	0.046979	0.0457347	0.0240673	0.0374018	0.0198471	0.0373079	0.037301	0.0199477	0.0608028	0.0263712	0.0260902	0.0208938	-0.003434	0.0263314	0.0145972	-0.0010205	0.00831076	0.0141612	0.0202026	0.0143615	0.023237	-0.000638519	0.0311413	-0.023156	-0.0170971	-0.0183648	0.0154919	-0.0175838	0.0522713	0.0386076	-0.00229044	0.00327653		0.00255567
7.5	0.0201134	0.0218798	0.0508311	0.061613	0.0303475	0.0309448		0.0375162	0.0334458	0.0237074	0.0654068	0.0159307	0.0477822	0.0331553	0.0331689	0.00800912	0.0359102	0.0240086	0.0276706	0.0197793	0.027612	0.0468779	0.0295478	0.0316158	0.0114243	0.0112344	0.0183961	0.0263512	-0.00325522	0.0445588	0.0141644	0.0234147	0.0142752	0.0203241	0.0441706	0.00852056	0.0144004	-0.0371563	0.043543	0.0492953	0.0477754	0.0482362	-0.0182646	-0.0167543	0.00405128	-0.00286548	0.00262189		0.0220109
8	0.0297441	0.0411482	0.00561268	-0.00607194	-0.00422644	0.0304168		0.0275934	0.0527293	0.0332449	0.0455186	0.0254465	0.0472921	0.0330025	0.0426871	0.0175701	0.0455575	0.0530095	0.0468733	0.029284	0.046752	0.0274685	0.0197517	0.0314829	-0.00352783	0.0412838	0.0269291	0.0116471	0.0414575	0.0297834	-0.0309987	0.0235346	-0.000526595	0.0650475	0.0294586	0.00864459	-0.00040511	0.0638318	0.0766629	0.115749	0.0805798	0.0476457	0.11542	0.0511381	0.00360219	0.131656	0.0357244		0.0316357
8.5	0.0298092	0.0412164	0.0357189	-0.0402352	0.0292443	0.0392715		0.00812321	0.0430884	0.0333146	0.0351967	0.0351676	0.0370477	0.0716946	0.042768	0.0662547	0.035852	0.0530708	0.0469386	0.0293526	0.0275503	0.0371724	0.019817	0.0606646	0.0114243	0.0112344	0.0320292	-0.00331013	0.0413228	0.0743852	-0.016007	0.0234147	0.0441014	0.0203241	0.0144881	0.0233637	0.0442449	0.0294606	0.0424538	0.0481197	-0.0537058	0.113836	0.0811912	0.0847206	0.0369944	0.0973313	0.00153318		0.0219441
9	0.0103524	0.0218798	0.0360897	-0.00712992	-0.0731797	0.0483425		0.0277429	0.0431627	0.0430612	0.0638005	0.0352371	0.0558536	0.0621197	0.0622091	0.046896	0.0359102	0.0337164	0.0470039	0.039063	0.0565121	0.0565192	0.0488787	0.0316158	0.0117699	0.0265373	0.0296642	0.0119003	0.0268598	0.0300593	0.0144702	0.0237745	-0.000303774	0.050434	1.89723e-05	0.0237438	-0.000171535	-0.0384334	0.00850204	0.0142664	-0.054096	0.0465512	0.0807693	-0.0180452	0.00276967	-0.00414003	-0.0324007		0.0317711
9.5	0.0395694	0.0315149	0.0513996	-0.0413307	0.0282173	0.0574814		0.0472131	0.0528045	0.0526667	0.0731071	0.0351676	0.045895	0.0813485	0.0524472	0.0176505	0.035852	0.0530708	0.0566045	0.0389936	0.0564479	0.0564531	0.0488108	0.0412545	0.0270196	0.0566641	0.0275082	0.0269329	0.0270582	0.089967	-0.000474492	0.00895581	0.0147885	0.0357479	0.0299115	-0.00577596	0.0448063	0.0622286	0.00787761	-0.0198449	0.0452501	0.0457949	0.0800108	0.0495852	0.0699186	0.0289632	-0.0330248		0.0609814
10	0.0395034	0.0508489	0.0361516	-0.00818544	0.0619036	0.0471142		-0.00172145	0.0624446	0.0525953	0.0819589	0.054401	0.0451287	0.0909208	0.0426871	0.03701	0.0650848	0.0724218	0.0758682	0.0582044	0.075647	0.0563871	0.0487429	0.0411872	0.0118276	0.0565469	0.0414475	0.0119637	0.0269259	0.0450508	0.0296163	0.00883844	0.0594416	0.0504975	8.10365e-05	0.00895484	0.0446815	0.0619377	0.0747006	0.0467131	0.0449028	0.145594	0.0796741	0.0152109	0.035789	0.129687	0.0337631		0.0511526
10.5	0.0395694	0.0315149	0.00614515	0.024936	-0.00633544	0.0754179		0.0178957	0.0528045	0.0816948	0.0624183	0.0351676	0.064107	0.0716946	0.0814849	0.0370921	0.035852	0.0433638	0.0662703	0.0582756	0.075713	0.027532	0.0391462	0.0509595	0.0271377	0.0567813	0.0485504	0.0122171	0.0420644	0.0453323	-0.0305759	0.00907323	-2.50239e-05	0.0507516	0.0151852	-0.00565438	0.0299944	0.0953679	0.107937	0.0798123	0.077881	0.178588	0.0458746	0.117183	0.0355217	0.129385	0.0334622		0.0707408
11	0.0298743	0.0509869	0.082044	0.0580336	0.061294	0.0844492		-0.00157717	0.0528797	0.0527381	0.0909435	0.0545435	0.0636796	0.091084	0.0718892	0.0177309	0.0261449	0.06284	0.0470039	0.0679887	0.0661455	0.0854429	0.0585441	0.0704397	0.0424586	0.0720035	0.046459	0.0570222	0.0423344	0.0754801	0.0149296	0.0393218	0.0599303	0.0658903	0.000577948	0.0391776	0.030239	0.0950654	0.0740986	0.112888	0.0775222	0.0447884	0.0790014	0.116877	0.0690802	0.0618047	0.0331614		0.0805721
11.5	0.0394374	0.0410801	0.0367707	0.0241802	0.094853	0.0841296		0.0372894	0.0623685	0.0815468	0.100293	0.0543298	0.0729798	0.0908393	0.0619612	0.0174897	0.0552612	0.0529483	0.0854645	0.0581333	0.0659502	0.0563211	0.048675	0.0508232	0.0425794	0.0421432	0.0513945	0.0125977	0.0275877	0.0457548	-7.67236e-05	0.00942574	0.0301812	0.0362458	0.015566	0.00957616	0.060251	0.0273004	0.0402119	0.145853	0.0104775	0.077709	0.0451454	0.116495	0.102542	-0.0057901	0.0327859		0.0901136
12	0.0590218	0.0799508	0.0671056	0.0238447	0.0266817	0.102972		-0.011493	0.081875	0.0719456	0.100141	0.054401	0.0824191	0.110227	0.110436	0.04673	0.084612	0.0821279	0.0758682	0.0678446	0.075647	0.0660267	0.0680703	0.0702998	0.0275511	0.0422006	0.0639127	0.0275156	0.0276539	0.0458252	-2.69627e-05	0.0395062	0.0153026	0.0809735	0.0602247	0.0245052	0.0453687	-0.0066591	0.00642454	0.0787611	0.0767159	0.0773623	0.145094	0.0481087	0.0346542	0.0611806	0.065967		0.0999449
12.5	0.0590895	0.0703209	0.0218783	-0.00988531	0.0603051	0.112061		0.086303	0.0722366	0.0816948	0.109406	0.0737769	0.0724761	0.11031	0.110523	0.0565338	0.0651455	0.0724848	0.0759361	0.0968396	0.094978	0.0853743	0.0584754	0.0703697	0.0126356	0.0573683	0.0655057	0.0425684	0.0129655	0.0759189	0.0152362	0.0246758	0.0304152	0.0662799	0.0455581	0.0395667	0.0605065	0.0604143	0.0731223	0.111798	0.142907	0.110331	0.0779104	0.0818566	0.135746	0.0273036	0.0991244		0.129297
13	0.0689182	0.0606893	0.0672996	0.0567307	0.0601532	0.121308		-0.0308972	0.0820305	0.0914457	0.1381	0.0641966	0.0818368	0.139358	0.100929	0.046896	0.0554409	0.06284	0.105004	0.0969142	0.0950457	0.104725	0.0875404	0.0898516	0.0579141	0.0573683	0.081631	0.0574268	0.057627	0.0759189	0.0152362	0.0396906	0.0304152	0.0960647	0.0455581	0.0395667	0.0904067	0.0266061	0.0729723	0.111631	0.0761792	0.0435334	0.0777427	0.0476878	0.0680347	0.060765	0.0654991		0.158654
13.5	0.0784709	0.0992787	0.0823741	-0.0105312	0.0258067	0.121059		0.0568309	0.0720828	0.100895	0.128224	0.073631	0.119914	0.129448	0.129704	0.0758044	0.065024	0.0820641	0.0854645	0.0966905	0.104473	0.104514	0.0873264	0.0702299	0.0276693	0.0423154	0.102947	0.0425022	0.057558	0.0907856	0.0302976	0.0246156	0.000477351	0.0959971	0.0752274	0.0395018	0.0903402	0.0598355	0.105985	0.0444566	0.108894	0.0763238	0.0772402	0.0132633	0.0676173	0.0939257	0.0315862		0.168174
14	0.0884402	0.080094	0.112446	0.0560372	-0.00822385	0.149106		0.0668362	0.0820305	0.110799	0.147101	0.0641966	0.138673	0.168322	0.12997	0.0760611	0.0652063	0.0919636	0.105004	0.116198	0.123946	0.104725	0.0972058	0.0995575	0.0425794	0.0721236	0.110099	0.0274508	0.0722332	0.120434	0.0150318	0.0394447	0.0301812	0.110681	0.0452934	0.0541728	0.134975	0.0933302	0.0389158	0.0776318	0.108709	0.0095799	0.0770728	0.0811254	0.0674783	0.0937815	0.0648759		0.197695
14.5	0.117723	0.0897964	0.112996	-0.0442903	0.12707	0.158421		0.0766096	0.0917475	0.110799	0.156574	0.0738499	0.148085	0.158667	0.12029	0.0857829	0.0847371	0.0725478	0.0953374	0.12584	0.133579	0.104725	0.0682095	0.0995575	0.0581614	0.0576034	0.12974	0.0279694	0.0579028	0.150944	0.0154409	0.0399367	0.0455958	0.111233	0.10532	0.0398263	0.135539	0.160365	0.172492	0.144033	0.108432	0.0758918	0.143568	0.0809063	0.236004	0.127126	0.0980729		0.236735
15	0.156767	0.109201	0.128282	0.122304	0.126907	0.186611		0.0863829	0.0917475	0.120476	0.175592	0.0738499	0.147849	0.168322	0.15901	0.0760611	0.0945024	0.0531321	0.124338	0.135482	0.114312	0.14329	0.116537	0.0704397	0.0884869	0.0727245	0.142226	0.0726982	0.0580407	0.151104	0.0457871	0.0550827	0.0606646	0.126271	0.12034	0.0399562	0.165597	0.126578	0.138882	0.110545	0.108248	0.208802	0.143389	0.114743	0.134613	0.093421	0.0310625		0.266016
15.5	0.166451	0.109127	0.128352	0.0553447	0.126661	0.205306		0.066758	0.101385	0.130075	0.184973	0.0641245	0.138051	0.15858	0.158919	0.0954173	0.123732	0.0724848	0.0952678	0.145045	0.133508	0.123936	0.0971336	0.0800749	0.058347	0.0877895	0.156513	0.102502	0.0730062	0.166134	0.045841	0.0551456	0.0756762	0.156145	0.105535	0.0846615	0.135751	0.0927283	0.205506	0.143601	0.174413	0.108722	0.176479	0.0465677	0.168118	0.0932048	-0.00257727		0.285446
16	0.13732	0.148088	0.143431	0.0220037	0.126661	0.195646		0.0962371	0.111262	0.168943	0.194432	0.0835769	0.157018	0.187722	0.168782	0.12476	0.0652671	0.0726109	0.105075	0.13556	0.143285	0.12408	0.116611	0.0899233	0.073386	0.057721	0.160044	0.0726982	0.0729359	0.181002	0.0457871	0.0701055	0.0756136	0.141172	0.135217	0.0697138	0.180555	0.0254978	0.205506	0.110294	0.174413	0.141984	0.143121	0.0465677	0.100654	0.160296	-0.00257727		0.305149
16.5	0.176524	0.157949	0.143646	0.121565	0.0924069	0.18599		0.076847	0.121142	0.159427	0.213512	0.0837246	0.175978	0.178245	0.188332	0.144388	0.0849247	0.0921579	0.124554	0.135716	0.162701	0.133868	0.116759	0.119192	0.0735758	0.072905	0.172601	0.102645	0.0433487	0.18125	0.0308228	0.0702983	0.0907545	0.141387	0.0907972	0.0699167	0.180779	0.125953	0.205073	0.143169	0.207129	0.174769	0.20936	0.0801769	0.167726	0.126376	0.0304647		0.36391
17	0.166683	0.177278	0.189103	0.0882385	0.0924069	0.223899		0.115868	0.140498	0.169025	0.232761	0.112615	0.166418	0.226438	0.188238	0.18319	0.0946292	0.101803	0.124482	0.164569	0.172262	0.143438	0.0973503	0.119118	0.0886807	0.0578975	0.177771	0.117516	0.0731469	0.18125	0.0459488	0.0552714	0.0907545	0.141387	0.165202	0.0847994	0.195741	0.0251521	0.138236	0.17646	0.173923	0.174769	0.176017	0.148094	0.134009	0.159906	0.0972658		0.393098
17.5	0.186287	0.148244	0.188952	0.0215863	0.0924069	0.214056		0.106175	0.121142	0.149747	0.251652	0.103036	0.18521	0.216874	0.198014	0.202734	0.0946927	0.072737	0.134224	0.174294	0.181972	0.133868	0.136095	0.0900666	0.0885515	0.0877895	0.183103	0.0876347	0.0730062	0.210985	0.045841	0.0851939	0.0457755	0.171047	0.135292	0.0995417	0.270387	0.125953	0.205073	0.243044	0.240335	0.208016	0.20936	0.114135	0.134009	0.159906	0.130666		0.422486
18	0.195971	0.177278	0.219487	0.0547396	0.126089	0.22353		0.096318	0.159936	0.188382	0.242032	0.102961	0.194766	0.236095	0.207602	0.212361	0.114163	0.0920931	0.13415	0.193499	0.172262	0.153081	0.107017	0.119118	0.073639	0.0579563	0.192043	0.0729737	0.028516	0.196287	0.0611301	0.0703626	0.0459554	0.17127	0.165279	0.0551002	0.225744	0.226579	0.204899	0.176282	0.273327	0.174579	0.209169	0.147936	0.234991	0.2268	0.130499		0.432146
18.5	0.205814	0.206473	0.20441	0.0880597	0.126089	0.223254		0.115951	0.16974	0.198145	0.261003	0.112692	0.213624	0.245847	0.21738	0.241631	0.104461	0.0824474	0.143893	0.183938	0.191608	0.143512	0.126427	0.0900666	0.0737023	0.0580152	0.197289	0.0879156	0.0732877	0.226282	0.0611854	0.0704268	0.0460154	0.171344	0.135589	0.0849374	0.270717	0.125797	0.305136	0.276139	0.273327	0.174579	0.242507	0.147936	0.20128	0.193275	0.130499		0.481063
19	0.195971	0.177278	0.249957	0.0879703	0.126007	0.204311		0.106093	0.189092	0.207739	0.299476	0.151235	0.204071	0.245751	0.207602	0.260978	0.0946292	0.0920931	0.143819	0.203143	0.220437	0.172367	0.126352	0.10941	0.103984	0.0730856	0.200814	0.0879859	0.0882611	0.241326	0.0915007	0.085522	0.0759894	0.171419	0.195203	0.0850064	0.255834	0.125719	0.171404	0.209475	0.206826	0.141246	0.175739	0.147857	0.167491	0.159673	0.0636324		0.510241
19.5	0.196051	0.187063	0.234721	0.121011	0.15959	0.213601		0.16483	0.208618	0.207824	0.280056	0.141659	0.223007	0.284476	0.227062	0.280529	0.123997	0.0824474	0.143893	0.23216	0.201244	0.172443	0.126427	0.128901	0.0737023	0.0880356	0.209833	0.0879156	0.0732877	0.226282	0.030928	0.0704268	0.0609711	0.171344	0.195123	0.0849374	0.255752	0.226231	0.304753	0.275746	0.239712	0.240657	0.242113	0.14762	0.200955	0.226464	0.130165		0.520115
20	0.205895	0.19685	0.295427	0.0543941	0.15959	0.251479		0.155141	0.218428	0.20791	0.308906	0.151395	0.232559	0.284575	0.246527	0.270907	0.133831	0.121357	0.163307	0.203311	0.220595	0.201453	0.116833	0.128976	0.119092	0.0430625	0.211637	0.0879859	0.0733581	0.256283	0.0915007	0.085522	0.0909464	0.186327	0.224973	0.129667	0.300732	0.192649	0.304753	0.275746	0.239712	0.240657	0.242113	0.14762	0.200955	0.259977	0.163547		0.549517
20.5	0.225341	0.187063	0.280354	0.0877023	0.193417	0.232447		0.0963988	0.228057	0.217504	0.299196	0.160971	0.222922	0.294133	0.265793	0.280529	0.123997	0.111579	0.153562	0.251449	0.230152	0.201375	0.145763	0.128901	0.0889392	0.0881587	0.222289	0.102932	0.0883329	0.271331	0.0461646	0.115652	0.0610937	0.216222	0.195282	0.12974	0.315785	0.226231	0.271353	0.275746	0.239712	0.207428	0.242113	0.215501	0.234653	0.259977	0.19693		0.549403
21	0.215741	0.196933	0.295597	0.121011	0.193417	0.222794		0.155227	0.247681	0.217676	0.289395	0.13216	0.232301	0.275015	0.246626	0.280736	0.143668	0.102	0.163383	0.24198	0.220674	0.191887	0.145916	0.119341	0.0890039	0.103234	0.225811	0.103003	0.0884046	0.286381	0.0916167	0.115721	0.120994	0.20139	0.225137	0.114923	0.330841	0.226231	0.237953	0.209199	0.239712	0.273886	0.175462	0.14762	0.234653	0.192952	0.163547		0.608218
21.5	0.205895	0.216262	0.310756	0.187529	0.0918564	0.213236		0.145364	0.257309	0.22727	0.308529	0.170708	0.232215	0.284575	0.265894	0.300083	0.1436	0.121357	0.163307	0.222602	0.239869	0.191809	0.155508	0.138685	0.104116	0.0882202	0.227528	0.147634	0.10331	0.286381	0.0764839	0.100687	0.0761147	0.20139	0.2698	0.159591	0.330841	0.158986	0.237864	0.242377	0.305978	0.273782	0.341983	0.181479	0.200873	0.25989	0.163461		0.617862
22	0.225341	0.216178	0.310756	0.153938	0.159251	0.251101		0.16483	0.257216	0.256222	0.337368	0.170627	0.251312	0.303791	0.275476	0.299977	0.1533	0.121289	0.18257	0.261094	0.25906	0.220662	0.155431	0.128901	0.104116	0.133263	0.227442	0.147634	0.10331	0.286381	0.0310858	0.130754	0.0910744	0.231212	0.284687	0.174481	0.375747	0.158743	0.304371	0.341877	0.239297	0.207036	0.24172	0.147305	0.234316	0.25963	0.129831		0.647031
22.5	0.244869	0.206473	0.325916	0.153938	0.193067	0.241541		0.145279	0.276655	0.236863	0.346884	0.180282	0.251224	0.284476	0.294841	0.290253	0.172836	0.111579	0.192239	0.261094	0.25906	0.230306	0.145763	0.158026	0.119227	0.103234	0.229159	0.132757	0.133122	0.286381	0.0764839	0.130754	0.120994	0.216301	0.284687	0.174481	0.390716	0.192313	0.270983	0.341877	0.272473	0.306687	0.24172	0.215161	0.234316	0.25963	0.129831		0.666557
23	0.225589	0.235845	0.341075	0.153843	0.159167	0.232169		0.155313	0.306107	0.246808	0.337368	0.190188	0.270408	0.313752	0.25641	0.300294	0.182818	0.150631	0.182802	0.290303	0.268946	0.220904	0.165333	0.148549	0.134339	0.118249	0.230961	0.147634	0.133122	0.33126	0.0916167	0.130754	0.0910744	0.231212	0.299575	0.159591	0.375747	0.192229	0.270891	0.275256	0.272366	0.30658	0.241622	0.215077	0.234232	0.226045	0.129747		0.657164
23.5	0.215823	0.21643	0.341254	0.120457	0.125273	0.260282		0.213984	0.286662	0.25649	0.298636	0.209505	0.241503	0.275113	0.275781	0.310021	0.192589	0.131204	0.202146	0.290303	0.268946	0.230551	0.165333	0.15826	0.104248	0.118377	0.232678	0.132906	0.148182	0.346415	0.0917327	0.130893	0.0912024	0.246285	0.269972	0.159743	0.420846	0.225709	0.270798	0.275158	0.30543	0.306474	0.274832	0.282836	0.200467	0.292951	0.163029		0.657164
24	0.235439	0.216513	0.325916	0.153462	0.226429	0.241448		0.223855	0.306204	0.25658	0.337175	0.199931	0.260683	0.313854	0.266196	0.290672	0.212204	0.140987	0.202225	0.280747	0.288308	0.240279	0.184755	0.148625	0.104116	0.133263	0.229072	0.132757	0.10331	0.316301	0.0916167	0.130754	0.0910744	0.246123	0.299575	0.174481	0.405685	0.259004	0.203774	0.274864	0.305101	0.306153	0.274528	0.24865	0.301238	0.259196	0.196125		0.696352
24.5	0.245037	0.226053	0.341254	0.153272	0.226248	0.250818		0.204115	0.31573	0.275763	0.346689	0.219077	0.260595	0.303992	0.275679	0.300188	0.202286	0.131136	0.192396	0.299857	0.297775	0.240114	0.174925	0.187313	0.164705	0.118377	0.230789	0.177545	0.118365	0.346415	0.0765973	0.130893	0.121127	0.276112	0.329533	0.189527	0.405874	0.191725	0.236969	0.274668	0.238571	0.30594	0.241033	0.248475	0.267392	0.225543	0.162597		0.715628
25	0.244953	0.216262	0.37167	0.153462	0.158829	0.231705		0.223578	0.315632	0.275672	0.346494	0.218991	0.260418	0.313549	0.294945	0.280632	0.241289	0.150491	0.211658	0.30941	0.278416	0.230387	0.184515	0.167814	0.119429	0.13346	0.241604	0.147861	0.178078	0.346512	0.106928	0.130963	0.10623	0.246366	0.299842	0.174712	0.435915	0.259004	0.270521	0.308111	0.305101	0.339356	0.241229	0.24865	0.267567	0.259196	0.196125		0.715499
[truncated: 45 more columns]

## Sheet: Figure S11
S12 Gene
	H2O control			Males							Females									AC18
Time (min)	1	2		2	4	18	19	25	33		1	2	3	11	12	17	23	31		1
0.7	2785	2793		2792	2809	2878	2832	2852	2762		2783	2836	2832	2866	2845	2802	2795	2756		2852
1.4	2793	2796		2800	2819	2885	2840	2858	2765		2791	2847	2832	2874	2854	2812	2805	2760		2857
2.1	2794	2800		2799	2824	2890	2843	2860	2773		2797	2856	2836	2878	2858	2815	2811	2768		2861
2.8	2802	2806		2809	2827	2899	2850	2867	2778		2798	2863	2843	2883	2862	2818	2812	2775		2868
3.5	2805	2813		2812	2829	2901	2858	2874	2776		2802	2866	2845	2889	2866	2821	2818	2779		2870
4.2	2804	2812		2814	2835	2904	2857	2880	2779		2809	2875	2848	2889	2870	2826	2822	2781		2875
4.9	2811	2816		2817	2838	2909	2862	2882	2785		2813	2877	2854	2895	2875	2830	2823	2783		2880
5.6	2814	2820		2817	2842	2913	2866	2886	2787		2816	2880	2860	2900	2877	2829	2828	2785		2884
6.3	2817	2822		2825	2847	2916	2868	2887	2793		2820	2880	2862	2901	2883	2834	2835	2787		2888
7	2822	2827		2826	2853	2917	2872	2893	2794		2820	2892	2865	2905	2887	2838	2833	2792		2894
7.7	2820	2829		2829	2853	2924	2876	2898	2796		2827	2894	2866	2909	2889	2840	2837	2797		2897
8.4	2825	2835		2833	2857	2925	2878	2897	2799		2829	2896	2872	2915	2895	2846	2840	2798		2903
9.1	2825	2836		2837	2860	2932	2882	2906	2804		2830	2901	2875	2915	2895	2845	2845	2798		2904
9.8	2830	2836		2837	2862	2931	2885	2904	2805		2832	2905	2876	2921	2900	2850	2846	2802		2907
10.5	2828	2841		2841	2867	2937	2885	2910	2809		2836	2904	2881	2921	2901	2853	2850	2808		2907
11.2	2837	2842		2844	2866	2938	2891	2913	2810		2837	2909	2887	2928	2907	2860	2849	2830		2913
11.9	2838	2845		2850	2872	2946	2896	2917	2812		2844	2916	2885	2933	2909	2869	2858	2834		2915
12.6	2844	2850		2854	2876	2944	2901	2918	2816		2844	2913	2888	2936	2913	2873	2862	2841		2919
13.3	2843	2856		2865	2882	2951	2909	2921	2818		2845	2916	2891	2940	2917	2884	2857	2851		2921
14	2849	2857		2870	2881	2955	2918	2928	2822		2851	2921	2893	2950	2920	2896	2860	2858		2926
14.7	2850	2857		2885	2885	2955	2927	2929	2827		2850	2924	2897	2952	2921	2915	2869	2870		2928
15.4	2854	2863		2896	2888	2958	2939	2936	2832		2856	2930	2900	2960	2927	2932	2870	2885		2933
16.1	2853	2864		2912	2890	2963	2960	2938	2838		2863	2932	2905	2973	2936	2948	2876	2904		2936
16.8	2858	2866		2931	2895	2968	2978	2944	2848		2858	2936	2908	2984	2947	2971	2880	2923		2941
17.5	2855	2870		2951	2898	2973	2994	2957	2853		2861	2941	2909	2995	2956	2992	2894	2945		2945
18.2	2862	2875		2972	2901	2977	3019	2963	2865		2864	2939	2912	3011	2967	3017	2903	2966		2954
18.9	2868	2878		2992	2906	2982	3043	2979	2878		2869	2943	2920	3018	2981	3037	2912	2990		2957
19.6	2868	2881		3012	2904	2989	3067	2990	2885		2872	2948	2921	3034	2996	3057	2927	3016		2966
20.3	2870	2886		3031	2910	3000	3089	3008	2903		2871	2953	2928	3043	3012	3077	2944	3038		2970
21	2872	2891		3051	2919	3010	3112	3025	2917		2877	2958	2932	3054	3035	3095	2965	3063		2975
21.7	2878	2891		3068	2925	3023	3134	3040	2935		2879	2961	2936	3067	3051	3104	2984	3084		2983
22.4	2880	2895		3085	2928	3038	3148	3062	2950		2887	2964	2946	3076	3073	3122	3004	3105		2992
23.1	2881	2898		3103	2933	3054	3170	3083	2969		2890	2971	2951	3091	3098	3140	3029	3124		3002
23.8	2881	2904		3121	2944	3068	3190	3104	2990		2894	2981	2958	3103	3121	3152	3055	3142		3011
24.5	2883	2909		3132	2951	3085	3208	3123	3006		2899	2991	2966	3110	3144	3162	3073	3156		3017
25.2	2888	2917		3150	2960	3107	3227	3145	3024		2905	3000	2977	3118	3162	3180	3093	3179		3025
25.9	2892	2917		3161	2973	3123	3243	3169	3037		2911	3014	2988	3134	3188	3193	3115	3191		3035
26.6	2893	2926		3173	2981	3144	3259	3186	3055		2920	3027	2999	3147	3205	3204	3132	3203		3043
27.3	2901	2934		3187	2994	3155	3272	3206	3066		2928	3043	3014	3158	3225	3217	3154	3220		3050
28	2898	2943		3197	3006	3176	3285	3227	3082		2942	3059	3027	3165	3242	3230	3169	3231		3056
28.7	2903	2945		3209	3019	3195	3303	3243	3093		2951	3078	3038	3183	3260	3245	3183	3245		3065
29.4	2912	2951		3223	3030	3214	3318	3259	3101		2960	3084	3052	3190	3276	3256	3201	3259		3075
30.1	2912	2962		3231	3045	3230	3331	3276	3107		2973	3102	3063	3205	3294	3266	3212	3270		3082
30.8	2913	2967		3244	3057	3239	3342	3291	3117		2989	3121	3076	3215	3308	3277	3230	3279		3088
31.5	2920	2975		3252	3069	3259	3350	3308	3122		2996	3134	3085	3224	3320	3284	3245	3294		3097
32.2	2925	2980		3260	3080	3267	3359	3313	3129		3009	3143	3101	3234	3333	3295	3251	3301		3105
32.9	2931	2983		3274	3093	3279	3370	3328	3128		3022	3155	3109	3242	3343	3300	3268	3306		3114
33.6	2937	2993		3276	3098	3285	3379	3339	3137		3035	3164	3112	3254	3354	3306	3277	3319		3119
34.3	2941	2994		3281	3106	3292	3382	3346	3139		3042	3170	3128	3260	3363	3315	3289	3328		3128
35	2947	3001		3287	3113	3300	3393	3355	3147		3055	3179	3128	3268	3367	3315	3298	3335		3137
35.7	2948	3002		3295	3118	3304	3398	3361	3145		3062	3191	3136	3269	3380	3318	3308	3343		3144
36.4	2951	3001		3298	3127	3311	3399	3366	3143		3069	3191	3144	3276	3382	3325	3316	3349		3153
37.1	2962	3004		3302	3127	3312	3402	3373	3146		3075	3198	3146	3283	3388	3329	3323	3355		3158
37.8	2960	3010		3306	3133	3315	3411	3374	3150		3081	3203	3153	3288	3392	3327	3331	3356		3163
38.5	2968	3008		3312	3136	3324	3410	3385	3153		3089	3208	3153	3291	3396	3329	3340	3366		3173
39.2	2968	3012		3308	3137	3323	3418	3386	3146		3093	3209	3160	3295	3403	3330	3347	3365		3175
39.9	2975	3011		3312	3142	3323	3419	3389	3149		3096	3217	3166	3296	3405	3332	3351	3372		3182
40.6	2981	3014		3315	3141	3329	3417	3394	3149		3102	3217	3168	3302	3405	3330	3355	3377		3189
41.3	2988	3013		3314	3143	3328	3422	3394	3151		3104	3219	3176	3303	3411	3327	3361	3379		3192
42	2985	3012		3315	3148	3329	3423	3391	3156		3108	3221	3177	3303	3410	3329	3365	3380		3197
42.7	2987	3014		3317	3144	3331	3422	3401	3152		3108	3227	3178	3306	3415	3326	3367	3380		3202
43.4	2990	3012		3314	3149	3329	3427	3401	3150		3107	3225	3181	3310	3417	3325	3368	3381		3204
44.1	2996	3011		3313	3150	3331	3424	3400	3151		3113	3227	3186	3309	3420	3323	3368	3383		3208
44.8	2998	3012		3318	3149	3329	3421	3402	3156		3110	3222	3188	3307	3420	3322	3377	3386		3213
45.5	3000	3016		3316	3149	3322	3422	3404	3147		3115	3229	3185	3310	3425	3320	3374	3387		3213
46.2	3003	3011		3317	3147	3323	3422	3399	3147		3112	3227	3191	3306	3419	3314	3378	3389		3214
46.9	3005	3013		3313	3154	3324	3419	3403	3150		3115	3223	3192	3307	3423	3314	3378	3388		3218
47.6	3005	3012		3312	3148	3322	3415	3400	3151		3115	3222	3197	3309	3425	3313	3380	3387		3219
48.3	3012	3010		3312	3150	3322	3415	3401	3149		3115	3223	3194	3307	3429	3310	3381	3390		3223
49	3015	3011		3308	3153	3316	3416	3399	3148		3113	3218	3193	3310	3427	3307	3382	3386		3223
49.7	3016	3005		3307	3149	3317	3409	3398	3146		3108	3223	3196	3310	3423	3309	3383	3393		3221
AC18
	H2O control			Males							Females									AC18
Time (min)	1	2		2	4	18	19	25	33		1	2	3	11	12	17	23	31		1
0.7	2912	2919		2980	2943	2975	2954	3009	2871		2945	2954	2955	2976	3025	2900	2925	2956		2982
1.4	2916	2923		2987	2943	2976	2958	3017	2876		2951	2953	2960	2983	3033	2904	2932	2959		2989
2.1	2920	2925		2986	2947	2980	2952	3018	2878		2953	2958	2962	2992	3034	2902	2930	2959		2994
2.8	2923	2928		2988	2947	2983	2957	3015	2879		2952	2959	2967	2987	3037	2904	2931	2963		2992
3.5	2924	2929		2989	2950	2981	2963	3019	2882		2954	2958	2968	2987	3035	2908	2934	2963		2999
4.2	2926	2927		2990	2953	2983	2963	3021	2882		2949	2959	2968	2991	3036	2910	2936	2962		2994
4.9	2927	2929		2993	2958	2985	2965	3022	2886		2954	2957	2966	2991	3037	2908	2934	2965		2997
5.6	2925	2933		2989	2953	2984	2962	3020	2888		2956	2959	2967	2992	3036	2913	2936	2967		2995
6.3	2927	2932		2987	2953	2987	2964	3022	2883		2954	2964	2969	2996	3040	2910	2936	2969		2997
7	2931	2933		2988	2954	2985	2961	3021	2884		2959	2957	2967	2992	3038	2913	2933	2970		2996
7.7	2927	2931		2989	2952	2986	2969	3026	2885		2958	2959	2972	2997	3042	2911	2937	2968		2998
8.4	2929	2933		2990	2954	2982	2963	3023	2886		2958	2959	2970	2994	3042	2912	2938	2967		2999
9.1	2932	2933		2990	2954	2987	2967	3027	2884		2957	2962	2972	2995	3043	2912	2939	2971		3000
9.8	2932	2937		2991	2954	2986	2963	3023	2889		2958	2962	2970	2998	3044	2913	2939	2970		3001
10.5	2935	2932		2999	2954	2991	2969	3027	2886		2959	2964	2971	2997	3041	2910	2939	2968		3004
11.2	2930	2932		2995	2960	2987	2969	3030	2885		2958	2960	2973	2995	3045	2914	2941	2999		3004
11.9	2937	2937		2994	2954	2990	2968	3031	2889		2959	2964	2978	2997	3044	2912	2939	3002		3011
12.6	2932	2937		2994	2955	2991	2967	3031	2889		2960	2963	2973	2997	3043	2914	2936	3002		3009
13.3	2937	2938		2997	2956	2991	2969	3031	2888		2961	2962	2975	2993	3044	2914	2940	3003		3017
14	2935	2933		2995	2955	2992	2971	3031	2889		2960	2965	2975	2999	3044	2914	2943	3005		3022
14.7	2936	2935		2991	2955	2994	2972	3031	2892		2961	2963	2976	3000	3045	2916	2943	3002		3033
15.4	2936	2937		2995	2958	2992	2974	3033	2888		2962	2960	2981	3001	3045	2916	2947	3005		3049
16.1	2939	2939		2997	2955	2994	2972	3034	2891		2962	2963	2976	3004	3047	2913	2942	3008		3065
16.8	2934	2937		2996	2958	2991	2970	3035	2892		2961	2963	2976	3002	3047	2919	2940	3005		3087
17.5	2936	2937		2998	2959	2991	2973	3035	2893		2963	2971	2977	3006	3046	2915	2947	3003		3113
18.2	2944	2939		2999	2958	2992	2970	3033	2892		2964	2968	2979	3006	3049	2916	2946	3007		3146
18.9	2935	2945		3000	2961	2996	2975	3035	2895		2964	2966	2982	2998	3049	2919	2943	3009		3187
19.6	2941	2942		3000	2965	2995	2979	3037	2899		2962	2968	2980	3003	3048	2923	2945	3009		3229
20.3	2939	2942		3006	2960	3000	2979	3039	2897		2967	2968	2981	3003	3048	2918	2948	3011		3274
21	2939	2943		3004	2962	3005	2979	3040	2899		2966	2969	2982	3008	3053	2927	2947	3010		3323
21.7	2941	2944		2997	2964	2999	2981	3041	2906		2967	2971	2982	3012	3058	2927	2946	3013		3377
22.4	2944	2949		3007	2967	3002	2983	3041	2910		2967	2973	2984	3009	3053	2930	2948	3014		3430
23.1	2949	2949		3005	2971	3005	2982	3044	2908		2966	2972	2986	3009	3062	2931	2951	3023		3481
23.8	2943	2952		3008	2968	3007	2986	3046	2912		2970	2974	2985	3016	3061	2938	2948	3023		3535
24.5	2950	2954		3007	2971	3007	2984	3051	2918		2970	2975	2991	3013	3064	2945	2952	3025		3586
25.2	2947	2955		3010	2973	3016	2991	3051	2919		2973	2977	2988	3022	3067	2951	2956	3031		3635
25.9	2947	2955		3020	2976	3019	2995	3056	2923		2976	2978	2993	3023	3073	2963	2957	3039		3681
26.6	2949	2966		3017	2978	3024	2996	3059	2923		2974	2980	2997	3027	3074	2972	2958	3047		3730
27.3	2949	2967		3029	2980	3026	3002	3061	2930		2981	2983	3005	3031	3085	2981	2965	3053		3767
28	2951	2970		3030	2984	3031	3006	3068	2932		2983	2986	3007	3042	3088	2995	2970	3062		3811
28.7	2954	2970		3039	2989	3033	3009	3073	2935		2985	2989	3012	3043	3096	3005	2966	3069		3847
29.4	2955	2977		3037	2993	3041	3011	3072	2938		2987	2991	3010	3048	3101	3015	2973	3084		3879
30.1	2955	2982		3041	2995	3050	3017	3076	2942		2992	2999	3013	3059	3110	3032	2982	3102		3912
30.8	2956	2981		3047	3006	3049	3022	3085	2942		2992	2996	3019	3067	3124	3037	2986	3117		3945
31.5	2963	2988		3048	3007	3053	3023	3084	2947		2997	3004	3021	3075	3123	3052	2995	3132		3972
32.2	2964	2993		3050	3009	3058	3026	3087	2947		3001	3009	3022	3077	3136	3064	3003	3151		3995
32.9	2965	2995		3057	3017	3061	3032	3094	2946		3007	3015	3020	3087	3146	3070	3011	3165		4017
33.6	2969	2993		3059	3014	3061	3037	3096	2954		3014	3016	3030	3093	3154	3082	3026	3189		4040
34.3	2967	2999		3060	3018	3063	3036	3100	2950		3013	3014	3027	3103	3168	3091	3034	3207		4056
35	2967	3003		3060	3021	3066	3040	3103	2951		3013	3025	3034	3108	3177	3102	3042	3224		4078
35.7	2977	3002		3065	3024	3066	3040	3103	2957		3017	3023	3034	3112	3185	3107	3057	3245		4094
36.4	2973	3003		3063	3025	3074	3043	3107	2957		3021	3031	3039	3118	3193	3114	3065	3265		4111
37.1	2978	3011		3070	3024	3072	3043	3108	2960		3023	3030	3042	3125	3207	3123	3075	3278		4126
37.8	2976	3012		3070	3029	3077	3047	3114	2956		3026	3030	3041	3128	3219	3123	3088	3294		4145
38.5	2983	3013		3071	3032	3080	3043	3114	2962		3028	3029	3045	3139	3229	3130	3106	3311		4156
39.2	2986	3011		3071	3033	3081	3052	3117	2960		3034	3034	3045	3139	3244	3133	3112	3324		4169
39.9	2990	3016		3074	3032	3082	3053	3121	2962		3032	3037	3045	3143	3254	3134	3128	3336		4184
40.6	2986	3018		3077	3038	3083	3062	3122	2961		3038	3036	3049	3150	3266	3136	3142	3351		4196
41.3	2985	3016		3079	3041	3082	3058	3120	2962		3037	3040	3050	3155	3273	3139	3154	3359		4210
42	2993	3023		3079	3039	3087	3061	3126	2961		3041	3041	3051	3157	3285	3141	3163	3371		4223
42.7	2988	3021		3080	3039	3085	3062	3129	2965		3043	3039	3051	3161	3293	3145	3177	3384		4226
43.4	2989	3022		3081	3039	3089	3066	3127	2966		3043	3042	3054	3159	3304	3146	3186	3391		4238
44.1	2995	3022		3084	3043	3089	3062	3131	2971		3042	3041	3056	3163	3314	3144	3192	3394		4249
44.8	2991	3025		3084	3042	3087	3067	3130	2967		3043	3045	3057	3166	3321	3147	3200	3408		4255
45.5	2991	3026		3084	3042	3092	3064	3133	2971		3047	3046	3059	3168	3333	3149	3208	3412		4262
46.2	2993	3026		3086	3041	3093	3067	3134	2966		3052	3048	3054	3172	3336	3147	3216	3419		4267
46.9	2994	3024		3086	3039	3092	3068	3134	2969		3046	3046	3061	3169	3341	3147	3221	3421		4276
47.6	2995	3027		3088	3042	3088	3068	3136	2964		3049	3048	3060	3171	3349	3152	3230	3426		4285
48.3	3003	3028		3091	3046	3093	3069	3135	2969		3049	3052	3062	3177	3352	3145	3233	3430		4286
49	2997	3026		3095	3042	3093	3069	3135	2967		3048	3051	3062	3175	3359	3151	3241	3431		4291
49.7	3001	3030		3095	3041	3090	3067	3135	2971		3054	3050	3061	3178	3366	3150	3242	3435		4300
